# Supplementary material for: Differential transcriptome analysis and identification of genes related to resistance to blight in three varieties of Bambusa pervariabilis × Dendrocalamopsis grandis
Source: PeerJ. 2021 Oct 18;9:e12301. doi: 10.7717/peerj.12301 (PMC8530093; doi:10.7717/peerj.12301)
Supplement: Supplemental Information 1 [file peerj-09-12301-s001.xlsx]

## Sheet: Online Resource 1
article title：Differential transcriptome analysis and identification of genes related to resistance to blight in three species of Bambusa pervariabilis × Dendrocalamopisis grandis author names：Fengying Luo1†, Xinmei Fang1†, Han Liu2, Tianhui Zhu1, Shan Han1, Qi Peng1, Shujiang Li1,3* e-mail address of the corresponding author: 14087@sicau.edu.cn
Table S1 Primers of qRT-PCR
gene ID	Forward primer(5'to3')	Reverse prime(5'to3')
PH01000030G0570	TGAGACATTGTAGCCAGATAAGGG	TGGAACCGACAGGGAAGAAC
PH01000322G0910	GATTCCAGAGTCCTTGAGCAG	AGCCATTGAACCCACAGAGC
PH01000356G0220	CCGCTGCTGACCATTGTAGGAA	TCGAAGAGCCATTTGGGGAC
PH01000743G0130	GGGTAAAGCCCTCACTAACG	GGTGTCAATCCGAGCAAAG
PH01000967G0060	TCCGCACCCCTTTTATCT	GTCTTCGTCTCGTAGGTCTCAC
PH01001075G0100	AACAATCAACATCGTCGGC	CGCAGCGTCAGTTGTTAGA
PH01001222G0140	TACGGAGGGATGAGGAGTGA	TGGAATGAGATGATACAGGACG
PH01001261G0170	TGCGGATGAGGAGGTTTT	GACTGGGCAGCAGATTGTT
PH01001610G0170	TCTGATAAATGAGGCTAGGGC	GAAGAGGATCAGGTTGAGGG
PH01002098G0130	CTTCCACCACTACTCCATCCT	TTCTTCCCCGAAATAGGC
PH01002765G0010	ATGAACAGTACACTTGGGAGGT	CAATAAGAGGGTATGAGTGGGT
PH01002901G0100	AGGGAGAAGCATGAATTGCC	TCCAGCGAGGTTAGGGGTTA
PH01003226G0090	CGGAAGGCAAGACAAAACT	TCTCGGACAGCAGATGGTAC .
PH01151705G0010	CCATCGCCATCTACAACAAG	CACCGTGAATCCGTACCTT
PH01000966G0470	TTCTACAACGTGACGTGCCC	CCATTTTGCGACCGATTTAC
Phyllostachys_edulis_newGene_56747	CTGCAACTTCTCCTTCTCCG	CAGCTTGACAGGGTACGTCTT
Phyllostachys_edulis_newGene_63038	GGTGGTGGTAACAATGGCA	CCTCGAAGAACAGGATGGAC .
Phyllostachys_edulis_newGene_84366	TCTGTCCCTAACTTCGCTCTT	TTCGCCGCCAAGTCAAT
Phyllostachys_edulis_newGene_67872	TGAATCCTTGGAAAGTTGGC	TTTAGATGGCTGAAAGACCG
PH01000008G1560	AACAAAACCACCACAAGGG	AGAGCAGGAGGAGGACAAGA
PH01004943G0040	GCGTCGTCATCAAGGTCAA	CGATGCCAAAACAGGTAAGA
PH01087490G0010	TCGCCAAGCAGAAGAGAGTCC	TCACCATTTCCAGAAGACGTTTG
PH01000445G0570	CTTCCCAAACACAACGACCG	AGCAATGCCTGGTCTGATGTG
PH01000974G0460	GGCGAAGAAGAGCGTGGAGA	CGAAGATGTCGTTGATGAAGGAGT
PH01000040G1380	GTGGCTACGTGAAATTGCTTGG	TCTCGCATGGCACCTCCTT
PH01000445G0440	CGTGACGCCGTTCAAGATG	CTCCCTGGCGTAGAGGTTGA
GAPDH	ATGGAGAAGGCTGGGGCTCATTTGC	GATGACCCTTTTGGCTCCCCCCTGC
