# Supplementary material for: Differential transcriptome analysis and identification of genes related to resistance to blight in three varieties of Bambusa pervariabilis × Dendrocalamopsis grandis
Source: PeerJ. 2021 Oct 18;9:e12301. doi: 10.7717/peerj.12301 (PMC8530093; doi:10.7717/peerj.12301)
Supplement: Supplemental Information 2 [file peerj-09-12301-s002.xlsx]

## Sheet: S2
article title：Differential transcriptome analysis and identification of genes related to resistance to blight in three species of Bambusa pervariabilis × Dendrocalamopisis grandis author names：Fengying Luo1†, Xinmei Fang1†, Han Liu2, Tianhui Zhu1, Shan Han1, Qi Peng1, Shujiang Li1,3* e-mail address of the corresponding author: 14087@sicau.edu.cn
Table S2 The common DEGs among the same varity inoculated with A. phaeospermum or sterile water (Yellow) and different varieties inoculated with A. phaeospermum(Green) .
50 up-regulated DEGs in the J3 VS S3,J6 VS S6 and J8 VS S8 groups	J3-FPKM	S3-FPKM	J6-FPKM	S6-FPKM	J8-FPKM	S8-FPKM	24 down-regulated DEGs in the J3 VS S3,J6 VS S6 and J8 VS S8 groups	J3-FPKM	S3-FPKM	J6-FPKM	S6-FPKM	J8-FPKM	S8-FPKM	279 up-regulated DEGs in the J6 VS J3,J6 VS J8 and J3 VS S8 groups	J3-FPKM	J6-FPKM	J8-FPKM	528 down-regulated DEGs in the J6 VS J3,J6 VS J8 and J3 VS S8 groups	J3-FPKM	J6-FPKM	J8-FPKM
PH01000048G2090	7.80072	3.13771	17.1173	6.3615	5.33974	2.04249	PH01000005G1950	2.43963	6.12851	2.07922	5.91996	0.341458	4.44619	PH01000000G2440	0.737126	9.61863	0.056409	PH01000001G0190	1.32923	0	8.5847
PH01000091G1730	10.259	2.50772	200.45	7.28586	9.04478	4.15452	PH01000019G1710	4.4588	9.17077	29.9766	60.3089	15.4173	41.8992	PH01000000G7460	2.60464	27.1129	0	PH01000007G0830	12.4758	0.955575	43.4051
PH01000117G0090	3.06188	1.18013	7.61739	0.139322	4.19067	1.91246	PH01000045G0230	14.4259	31.6886	0.267242	44.8302	25.2999	53.1543	PH01000001G3420	0.945635	4.40591	0.054201	PH01000012G2650	7.14683	0	16.8186
PH01000193G0290	32.3623	1.9362	40.9724	0	23.5863	3.39349	PH01000053G1340	0.324187	2.02518	2.94048	11.908	0.325552	2.92795	PH01000002G1570	1.99095	12.2787	0	PH01000019G0920	0.795388	0	2.82012
PH01000193G1120	30.2177	12.0325	18.2869	0	51.8477	18.672	PH01000058G0190	3.62615	30.8157	4.13035	53.1113	1.89307	44.2429	PH01000003G0910	2.532	11.2385	0.796717	PH01000050G1090	1.70321	0	17.4459
PH01000223G0070	2.79855	0.41027	19.5593	0.849964	3.41397	0.157531	PH01000069G1880	7.92111	20.0966	19.7	125.929	2.0388	5.5654	PH01000003G3960	2.50531	55.6435	0.19617	PH01000059G0380	77.4796	1.45772	27.4308
PH01000315G0250	22.1576	1.99698	2.12529	0	25.3295	4.50754	PH01000164G0530	1.24499	3.75979	7.17167	12.185	1.23643	3.82953	PH01000006G1570	3.65388	29.2108	0.928518	PH01000063G0820	7.51297	1.6982	17.5254
PH01000321G0930	3.21071	1.44368	3.07196	0	1.75717	0.484465	PH01000178G0170	1.63662	3.88362	31.7135	46.7094	0.448906	2.32348	PH01000007G1750	9.27558	26.8768	4.28296	PH01000065G0670	14.0853	6.05072	33.8417
PH01000415G0090	5.03566	2.33346	24.2129	1.05026	5.3527	1.50062	PH01000276G0310	6.98752	14.4881	2.6423	7.46478	6.05351	32.9097	PH01000007G3390	29.2161	63.7599	10.4519	PH01000066G0460	6.11665	0	13.6412
PH01000570G0460	13.5187	4.12865	33.7485	6.7109	10.6002	2.47201	PH01000349G0450	2.74728	6.20662	2.55303	7.3613	2.39337	32.6931	PH01000008G1560	1.88331	19.2903	0.52635	PH01000066G1320	2.37639	0.773448	6.26351
PH01000591G0820	8.09766	0.96274	12.2055	3.96374	13.3596	4.09605	PH01000528G0010	0.450594	2.34176	9.54136	13.3149	1.88563	2.33207	PH01000009G0420	22.5703	97.1042	0.112892	PH01000068G1210	2.29778	0	11.5778
PH01000596G0230	1.91584	1.08138	25.8105	10.6206	2.24025	0.767863	PH01000588G0300	0.44535	1.02101	3.70523	18.8384	0	1.14002	PH01000011G0550	0.962717	10.8713	0.100324	PH01000070G1470	2.08672	0	5.76337
PH01000614G0780	24.2687	2.48246	24.5864	1.70805	10.5829	2.02844	PH01000631G0240	38.989	119.011	13.2808	79.6031	40.4567	81.1336	PH01000012G1010	3.66127	31.6711	2.25651	PH01000077G1100	3.36244	0	4.37313
PH01000672G0410	1.16293	0.372618	2.72606	0.497629	1.40992	0.17236	PH01000773G0530	1.52271	6.2886	5.84841	23.0011	3.00319	8.03434	PH01000012G1310	0.611701	59.2281	0	PH01000087G0330	2.25386	0	11.5412
PH01000743G0130	12.1309	5.27656	24.1662	0	1.14425	0.032206	PH01000818G0620	23.4828	66.7939	16.7584	303.749	29.1024	84.293	PH01000014G2300	4.06212	29.3151	1.65853	PH01000087G0360	1.52097	0.051947	5.6693
PH01001049G0510	5.82015	3.16275	12.7097	1.03264	15.279	4.26346	PH01001117G0220	1.12645	3.909	1.51622	4.93701	1.19937	5.52932	PH01000015G0010	2.81676	19.264	0.41117	PH01000087G0750	45.5669	3.40053	101.991
PH01001113G0130	39.0094	14.4227	88.1438	24.882	16.5916	6.38014	PH01001944G0020	3.22984	12.0714	0.064967	5.52314	8.32925	52.8714	PH01000018G1930	9.17674	28.7777	2.23044	PH01000098G0880	7.88467	0	19.6162
PH01001113G0650	20.5809	8.6329	25.566	2.32941	44.6356	13.5521	PH01002269G0120	1.06211	12.5998	1.84758	45.7182	2.59178	96.0728	PH01000024G1360	4.66246	34.2075	1.20618	PH01000107G1420	8.53589	0.814503	19.9453
PH01001114G0480	1.51338	0.246499	2.25866	0	0.971526	0.024777	PH01002839G0140	0.488394	5.0462	0	3.45338	1.19506	11.3152	PH01000027G0400	0.765944	3.28848	0.147467	PH01000108G1510	1.76755	0	5.21998
PH01001140G0500	10.6402	1.58733	1.63064	0	3.22837	1.4588	PH01003825G0020	3.38753	7.91228	0	2.92208	3.61845	17.0697	PH01000029G2300	2.75732	11.9654	0.04268	PH01000114G1490	3.03798	0	7.58944
PH01001170G0370	8.05961	2.58365	38.744	1.67366	60.4342	0.723663	PH01004825G0030	0.578476	1.5714	2.47166	12.9226	1.52547	2.12439	PH01000037G0830	0.841735	2.49144	0.094315	PH01000117G0540	9.25499	0	22.981
PH01001188G0490	8.80677	2.12866	1.1	0	3.6288	0.037266	PH01005634G0100	1.5992	3.71493	1.91491	10.2313	1.05423	20.7807	PH01000041G0270	1.86697	9.42096	0.462695	PH01000122G1000	6.78405	0	27.2263
PH01001410G0300	22.4758	0.765635	22.2015	0	23.1214	5.60024	PH01032478G0010	0.56917	2.83711	0.348062	13.0018	0.547288	40.1078	PH01000042G1330	3.29957	4.83609	1.03281	PH01000130G0820	4.51919	0	16.1223
PH01001579G0450	2.12237	0.877609	7.5925	0.223523	1.88548	0.548145	Phyllostachys_edulis_newGene_84741	0.392644	1.74038	0.763035	2.80893	0.313317	3.38593	PH01000044G0620	0.500384	6.95088	0.056905	PH01000131G0110	1.28901	0	2.8578
PH01001602G0160	30.0127	3.82411	28.9901	8.58004	14.5393	4.87676	Phyllostachys_edulis_newGene_85170	1.22477	6.68344	0.507083	27.7481	3.5641	25.5225	PH01000044G1720	3.01206	29.1909	0.924743	PH01000152G0730	5.16692	0.705093	11.64
PH01001652G0410	25.6215	3.39601	18.7341	3.84946	34.7376	2.41975								PH01000049G0480	132.108	555.556	35.7432	PH01000170G0120	1.76391	0	4.27272
PH01001830G0370	35.5055	3.10265	3.02807	0.636106	3.65512	1.22187								PH01000052G0690	2.36457	17.8065	0.907136	PH01000171G1110	111.417	27.9174	239.275
PH01001916G0130	4.06865	0.125039	55.832	11.2606	3.84779	0.54294								PH01000054G2280	5.03327	214.837	1.46372	PH01000173G0010	1.09678	0	3.13334
PH01002165G0280	31.8881	10.5348	9.3829	2.33749	50.093	14.4849								PH01000055G1560	19.5776	360.036	1.36419	PH01000179G0600	4.32212	1.64963	9.44091
PH01002489G0290	6.81313	3.69839	15.2511	3.63399	3.79369	1.6559								PH01000063G0370	3.5313	17.6856	2.13647	PH01000186G0280	7.6114	4.8807	18.0065
PH01002967G0190	2.45421	0.149127	6.07443	0.072623	2.25934	0								PH01000066G0590	6.32821	20.3657	2.56356	PH01000191G0240	1.79035	0	3.78066
PH01003019G0170	21.075	9.1278	2.24231	0	46.3845	9.44557								PH01000070G1010	1.64612	5.21764	0	PH01000252G0640	27.6337	0.467197	179.222
PH01003128G0100	13.2589	2.37001	3.92474	0.142005	3.5674	0.614481								PH01000077G0230	0.225692	5.10955	0	PH01000252G0950	0.5661	0	4.44409
Phyllostachys_edulis_newGene_20167	5.35882	0.405946	16.3579	0	4.35775	1.25047								PH01000077G0260	1.2659	3.45862	0	PH01000271G0050	1.09793	0	2.80805
Phyllostachys_edulis_newGene_26884	1.11202	0.060508	2.11718	0	0.766663	0.023549								PH01000078G0500	1205.47	443.579	103.221	PH01000271G0470	0.817774	0.160707	3.79453
Phyllostachys_edulis_newGene_29553	0.840141	0	2.42192	0	1.16055	0.078592								PH01000086G1530	2.17881	25.7325	0.405956	PH01000337G0750	43.4151	4.70163	114.924
Phyllostachys_edulis_newGene_34785	8.48431	0.471053	4.4314	0.06673	4.49133	0.755072								PH01000092G0430	10.4133	59.0592	5.0499	PH01000355G0640	9.21841	0	21.4093
Phyllostachys_edulis_newGene_35083	9.52517	0.49522	11.1766	0	6.70657	1.18645								PH01000094G0690	2.71335	4.06216	0	PH01000369G0850	16.0273	0	47.7869
Phyllostachys_edulis_newGene_44006	2.0356	0.92742	7.39166	2.1892	3.61767	1.18356								PH01000105G1070	3.37203	5.81502	1.6719	PH01000377G0950	2.67636	0	13.3571
Phyllostachys_edulis_newGene_49869	5.03422	1.96135	21.16	1.38831	0.944483	0.237121								PH01000106G1290	3.92047	15.7226	0.118996	PH01000382G0190	6.13841	0.255104	10.7948
Phyllostachys_edulis_newGene_53750	1.44703	0.391235	0.878597	0	2.34375	0.22444								PH01000111G0760	6.28244	42.1828	3.4858	PH01000404G0960	0.387575	0	1.30937
Phyllostachys_edulis_newGene_58619	7.02739	0.847097	4.3237	0.392902	2.33032	0.182891								PH01000113G0550	7.5941	9.63144	0.119194	PH01000450G1000	6.58887	2.1458	15.8587
Phyllostachys_edulis_newGene_61290	2.93897	0.729641	0.48728	0	6.45201	0.492068								PH01000129G0820	2.59946	6.85802	0.713537	PH01000457G0960	0.954726	0.190225	2.80109
Phyllostachys_edulis_newGene_62391	0.696709	0.235978	2.37847	0	0.790903	0.110415								PH01000140G0150	1.80847	5.3001	0	PH01000460G0550	2.06028	0.270026	4.39105
Phyllostachys_edulis_newGene_67224	6.05401	1.11527	0.955533	0.07629	10.5438	0.95758								PH01000143G0730	5.676	508.513	2.3748	PH01000466G0250	2.12577	0	89.2408
Phyllostachys_edulis_newGene_70756	49.0857	15.1137	44.5935	16.35	143.249	60.3628								PH01000152G1240	265.642	1859.77	106.649	PH01000476G0020	0.486183	0	2.00521
Phyllostachys_edulis_newGene_70834	0.528555	0	2.35859	0	1.37379	0.177482								PH01000159G0130	159.691	2520.68	59.1009	PH01000487G0060	3.46088	0.795196	6.57369
Phyllostachys_edulis_newGene_73643	6.15039	1.72072	4.27587	0	7.52727	1.85851								PH01000162G0450	1.13953	7.17668	0.297177	PH01000490G0370	4.21233	0	10.911
Phyllostachys_edulis_newGene_73645	2.77859	0.347147	6.56919	0	6.99293	0.399543								PH01000162G1260	97.7929	350.527	47.7252	PH01000512G0130	32.423	11.3791	66.2072
Phyllostachys_edulis_newGene_83316	2.95841	0.422543	2.20304	0	3.62834	0.571014								PH01000171G0040	1.85316	51.517	0.915568	PH01000515G0540	12.4534	1.38147	30.7327
														PH01000173G0220	1.28653	8.84528	0.34628	PH01000543G0780	477.196	0.392098	8.61259
														PH01000178G0330	2.39938	17.4491	0.037861	PH01000562G0230	6.75965	0	15.2981
														PH01000192G0370	0.811071	2.6997	0.029088	PH01000586G0860	0.751365	0	2.5944
														PH01000214G1150	5.27998	16.3331	1.92145	PH01000598G0150	5.95757	0.306653	14.45
														PH01000218G0100	1.7256	22.1559	0.549216	PH01000653G0470	6.27957	0	18.594
														PH01000235G0600	0.426222	2.65191	0.031781	PH01000665G0740	42.0663	0	80.0623
														PH01000237G1020	12.482	26.1338	0.999361	PH01000710G0750	2.68583	0	29.0583
														PH01000244G0650	4.23769	6.23587	0.704878	PH01000731G0060	14.1345	5.29231	31.2193
														PH01000260G1270	4.83929	43.2869	0.336145	PH01000829G0430	3.60765	0.145285	15.6869
														PH01000272G0990	0.465875	3.55203	0	PH01000837G0330	2.23879	0	0.483308
														PH01000279G0220	229.772	607.447	111.186	PH01000843G0230	1.2268	0	12.2593
														PH01000290G0250	2.82814	103.647	0.471214	PH01000925G0400	7.59182	1.07309	25.849
														PH01000302G0100	0.720139	9.1184	0.030235	PH01000945G0300	7.62163	1.39581	19.8387
														PH01000312G0670	0.848487	102.746	0	PH01000970G0380	16.4621	1.11339	35.327
														PH01000322G1030	0.514022	4.26966	0	PH01000985G0220	7.64658	0	16.5633
														PH01000343G0220	1.70294	6.74234	0.077625	PH01001057G0020	6.37881	0.484405	15.5915
														PH01000346G0240	8.52608	54.104	3.14346	PH01001064G0600	5.65594	0	6.72952
														PH01000356G0720	2.15148	3.86558	1.01511	PH01001075G0390	1.28464	0	3.16078
														PH01000357G0760	2.58804	46.3572	0.29174	PH01001112G0050	6.89039	0	14.3683
														PH01000370G0800	0.992942	5.48759	0.117597	PH01001118G0110	0.931517	0	2.06137
														PH01000373G0290	0.769789	4.32716	0	PH01001125G0050	3.73594	0.124718	17.874
														PH01000374G0610	1.21327	12.0463	0.441003	PH01001135G0640	4.40881	0	14.0657
														PH01000386G1060	1.21422	52.6096	0.514686	PH01001153G0140	15.6753	0	66.3586
														PH01000390G0370	1.73084	9.57066	0.030747	PH01001156G0500	0.817174	0	12.4083
														PH01000390G0410	8.74936	37.0254	0.310835	PH01001165G0020	5.79752	0.459714	14.2795
														PH01000407G0040	3.01571	20.5554	1.22788	PH01001178G0310	0.822832	0	3.81013
														PH01000407G0270	4.4924	18.7156	0	PH01001191G0550	2.03449	0	9.1514
														PH01000408G0520	1.29965	9.71141	0.474126	PH01001237G0100	1.5529	0	3.83004
														PH01000411G0050	1.61061	18.7849	0.509263	PH01001305G0260	2.48138	0	8.0405
														PH01000412G0010	1.81154	4.64865	0.741602	PH01001378G0110	1.40492	0	5.6797
														PH01000420G0920	0.51998	3.18648	0.158406	PH01001385G0300	1.19338	0	5.68621
														PH01000428G0210	1.81666	28.7123	0.427573	PH01001429G0170	5.1878	0	13.9153
														PH01000430G0310	1.945	21.9426	0.833709	PH01001440G0160	1.89876	0	3.1326
														PH01000448G0060	3.43255	22.2715	1.47655	PH01001461G0130	7.47295	0.874017	21.9023
														PH01000448G0740	2.60433	5.40815	0.279939	PH01001484G0250	1.43491	0	3.49397
														PH01000460G0750	0.603584	15.3703	0.096412	PH01001506G0290	12.3187	0	80.1017
														PH01000461G0470	3.6157	7.99481	1.2975	PH01001516G0400	7.10121	1.10282	16.9701
														PH01000475G0470	15.05	75.6673	6.91097	PH01001609G0130	3.12052	0.326858	6.0931
														PH01000480G0740	3.01916	15.9947	0	PH01001615G0240	36.1709	0	75.5493
														PH01000481G0070	31.3714	72.4725	8.94365	PH01001688G0440	1.4879	0	4.98568
														PH01000503G0270	134.434	318.227	62.8876	PH01001775G0210	150.11	1.71821	325.245
														PH01000514G0870	7.57259	42.3653	0.342008	PH01001777G0350	15.2366	0.402085	35.7656
														PH01000519G0700	1.79783	10.6465	0.590192	PH01001841G0070	2.97529	0	74.2173
														PH01000519G0920	1.44403	12.1198	0.008272	PH01001848G0380	2.26105	0.113552	7.65586
														PH01000562G0860	3.54251	6.16481	0.422413	PH01001971G0300	0.573532	0	6.49367
														PH01000585G0750	2.74106	6.68169	0.634647	PH01001979G0300	5.51213	0.20785	11.4117
														PH01000606G0670	0.363417	7.99344	0.047856	PH01002000G0400	10.8382	0	21.2627
														PH01000614G0160	8.87733	73.0835	2.73327	PH01002075G0180	22.1735	5.22759	52.1643
														PH01000617G0620	1.38439	3.45265	0.339005	PH01002135G0160	9.67487	2.14067	23.0363
														PH01000625G0050	2.92695	3.93314	0.036896	PH01002310G0030	37.6621	0.941642	159.125
														PH01000637G0080	2.41839	4.8372	0	PH01002328G0120	1.99888	0	36.4249
														PH01000640G0730	5.28146	11.3849	0.681182	PH01002422G0220	0.650614	0	2.56529
														PH01000696G0700	1.75712	14.1446	0.072854	PH01002500G0060	19.3579	0.736525	49.6429
														PH01000708G0250	0.330976	11.0026	0.020669	PH01002595G0160	7.52953	0.954271	16.7481
														PH01000712G0540	2.89654	5.02474	1.09193	PH01002712G0090	3.23582	0.379657	6.84297
														PH01000723G0340	0.96015	9.25475	0	PH01002971G0160	1.10005	0.144516	2.61617
														PH01000734G0610	0.775506	33.9809	0.079107	PH01003001G0230	3.08018	0	17.3259
														PH01000758G0280	16.0073	42.7714	5.65187	PH01003030G0230	21.9555	0.072459	60.6372
														PH01000770G0670	2.41021	10.5753	0.949221	PH01003092G0070	0.482782	0	2.78429
														PH01000777G0570	0.899775	20.8977	0.131964	PH01003138G0210	16.6951	0	49.7999
														PH01000798G0710	1.62567	43.1497	0.04454	PH01003243G0100	0.758645	0	3.23155
														PH01000845G0230	24.7238	58.4243	9.21388	PH01003366G0130	1.56878	0	4.30117
														PH01000944G0560	1.37857	41.1871	0	PH01003448G0180	1.81281	0	8.02181
														PH01000949G0710	7.74824	23.3079	0.607553	PH01003477G0120	9.98972	1.63215	20.3698
														PH01000957G0560	4.9021	54.0718	0.120618	PH01003717G0190	13.2258	0.3734	30.8211
														PH01000966G0470	4.52751	9.74184	0	PH01003720G0120	0.410457	0	3.44275
														PH01000967G0060	9.15788	63.6583	0	PH01004514G0010	4.08988	0.065424	14.4234
														PH01000994G0120	0.82873	22.4905	0	PH01004642G0100	4.03808	0	16.0743
														PH01001010G0270	4.99524	12.0484	1.7322	PH01004797G0010	3.87357	0.251119	12.2424
														PH01001011G0400	1.67419	6.89369	0.439637	PH01004839G0050	17.0801	0.677201	37.1302
														PH01001020G0160	0.330492	27.012	0	PH01006224G0020	1.34613	0	3.81173
														PH01001021G0480	0.272455	1.10361	0.016983	PH01011138G0010	7.76996	0	24.236
														PH01001045G0370	0.44557	6.30586	0	PH01027760G0010	4.35081	0	8.95977
														PH01001056G0480	7.33963	72.0432	2.15784	PH01062417G0010	31.0961	0	9.91951
														PH01001075G0100	0.396221	156.262	0.107746	PH01125096G0010	6.07646	0	30.8072
														PH01001108G0520	2.42393	4.16922	0.706605	PH01167417G0010	2.72088	0.088337	7.05715
														PH01001126G0390	0.796281	2.22919	0.061893	Phyllostachys_edulis_newGene_11500	1.69331	0	5.6664
														PH01001154G0590	16.738	39.3415	2.50781	Phyllostachys_edulis_newGene_12307	1.28357	0	8.48164
														PH01001175G0230	0.838933	1.37532	0	Phyllostachys_edulis_newGene_21801	33.6996	0	85.7848
														PH01001184G0580	2.11018	15.1872	0.810638	Phyllostachys_edulis_newGene_25761	6.71959	0.284736	15.7389
														PH01001208G0410	3.79796	26.6813	1.44798	Phyllostachys_edulis_newGene_25793	3.82572	0.22874	8.6166
														PH01001208G0480	2.26591	21.5779	1.00135	Phyllostachys_edulis_newGene_26348	5.65924	0.119087	11.2444
														PH01001222G0140	1.63947	8.3513	0	Phyllostachys_edulis_newGene_26903	4.06889	0.065926	1.17744
														PH01001222G0200	1.90446	30.928	1.05814	Phyllostachys_edulis_newGene_27491	7.00622	0	13.3912
														PH01001222G0340	1.7272	39.8427	0.067991	Phyllostachys_edulis_newGene_27598	1.53194	0	3.56976
														PH01001230G0380	1.22413	59.084	0.044992	Phyllostachys_edulis_newGene_28767	7.92231	0	15.005
														PH01001260G0140	1.48378	5.94251	0.596306	Phyllostachys_edulis_newGene_30296	6.63179	0	11.358
														PH01001281G0290	4.59161	84.6495	1.82136	Phyllostachys_edulis_newGene_31716	1.66487	0	6.48212
														PH01001291G0360	5.32403	12.482	0.228144	Phyllostachys_edulis_newGene_32025	14.8932	0	3.39789
														PH01001292G0190	0.590487	1.85582	0.075023	Phyllostachys_edulis_newGene_33100	2.26569	0	5.32073
														PH01001294G0150	0.553233	4.76756	0	Phyllostachys_edulis_newGene_34959	4.69336	52.9812	8.78368
														PH01001309G0230	0.484264	1.0087	0	Phyllostachys_edulis_newGene_36084	6.69956	1.47707	14.5905
														PH01001343G0080	7.79887	44.1416	2.6085	Phyllostachys_edulis_newGene_36192	5.87055	0.728397	13.6443
														PH01001343G0230	15.9237	24.3834	4.99262	Phyllostachys_edulis_newGene_36202	4.54092	0	6.97121
														PH01001343G0320	2.66235	33.101	1.18652	Phyllostachys_edulis_newGene_36389	4.6359	0	9.61106
														PH01001343G0370	0.713575	11.4298	0.140177	Phyllostachys_edulis_newGene_36920	24.5726	0	121.686
														PH01001348G0370	2.87619	5.99914	0.246345	Phyllostachys_edulis_newGene_37555	15.0042	0.030728	25.4108
														PH01001376G0370	2.27077	5.54826	0.624757	Phyllostachys_edulis_newGene_37636	2.07582	0	6.83662
														PH01001390G0020	2.5239	8.64002	0.669755	Phyllostachys_edulis_newGene_38102	6.20887	2.76592	15.5503
														PH01001391G0220	1.11217	3.46795	0.34238	Phyllostachys_edulis_newGene_38475	5.18926	0	13.7413
														PH01001411G0090	1.77167	20.4412	0.395583	Phyllostachys_edulis_newGene_39113	0.998659	0	2.22527
														PH01001440G0330	0.607959	2.73938	0.095016	Phyllostachys_edulis_newGene_39130	2.94801	0.137943	6.19018
														PH01001446G0280	1.57404	13.674	0.698005	Phyllostachys_edulis_newGene_39799	2.20869	0.462085	5.74265
														PH01001450G0470	1.30088	10.5878	0.164452	Phyllostachys_edulis_newGene_40827	33.3383	1.48401	61.5158
														PH01001577G0190	9.66457	110.384	3.51419	Phyllostachys_edulis_newGene_41387	3.25214	0	6.23179
														PH01001588G0160	0.927228	12.0933	0	Phyllostachys_edulis_newGene_41556	7.67072	0	15.6006
														PH01001634G0200	0.916748	5.81912	0.143295	Phyllostachys_edulis_newGene_41838	6.18433	0.160681	13.8537
														PH01001638G0160	0.766161	2.48523	0.100192	Phyllostachys_edulis_newGene_42123	11.6656	2.61135	24.723
														PH01001643G0420	72.3863	801.746	28.5686	Phyllostachys_edulis_newGene_42163	1.82272	0.160781	4.54067
														PH01001690G0200	11.354	77.3675	3.10256	Phyllostachys_edulis_newGene_43099	1.47663	0.095348	3.45292
														PH01001692G0140	2.91505	28.674	0.437198	Phyllostachys_edulis_newGene_43123	16.4744	0	82.5728
														PH01001698G0250	0.670764	1.7124	0.165508	Phyllostachys_edulis_newGene_45273	1.62408	0	4.70357
														PH01001736G0240	7.1892	34.0597	1.53335	Phyllostachys_edulis_newGene_45464	4.45518	2.50171	12.0578
														PH01001770G0010	0.636511	7.01477	0.014772	Phyllostachys_edulis_newGene_4606	1.65634	0	3.04776
														PH01001870G0020	0.73392	19.7419	0	Phyllostachys_edulis_newGene_48057	11.626	0	47.4547
														PH01001950G0080	1.43471	5.47762	0.667919	Phyllostachys_edulis_newGene_4859	0.60801	0	1.58919
														PH01001953G0280	3.42961	23.8183	0.984222	Phyllostachys_edulis_newGene_51049	1.60525	0	4.27018
														PH01001963G0300	5.75162	30.8928	0	Phyllostachys_edulis_newGene_51233	4.55964	1.00656	20.8184
														PH01001988G0060	3.0582	34.3971	0.84623	Phyllostachys_edulis_newGene_51581	5.68384	0.522735	14.5577
														PH01002152G0300	1.16303	9.02543	0.224879	Phyllostachys_edulis_newGene_52116	1.15554	0	9.63219
														PH01002172G0070	0.32274	11.7723	0	Phyllostachys_edulis_newGene_52516	0.862944	0	2.71354
														PH01002187G0400	2.33742	17.3615	0.494782	Phyllostachys_edulis_newGene_54908	3.37069	0	8.31528
														PH01002211G0270	4.43572	39.9198	0.273521	Phyllostachys_edulis_newGene_55917	2.57034	0.316448	5.67328
														PH01002231G0280	6.58071	10.9354	0.170612	Phyllostachys_edulis_newGene_55991	11.9194	1.94866	36.3927
														PH01002314G0300	4.70571	19.0207	1.5487	Phyllostachys_edulis_newGene_5625	1.96509	0.107139	5.53475
														PH01002332G0210	0.815302	1.83177	0	Phyllostachys_edulis_newGene_56774	6.54878	1.05668	24.6704
														PH01002335G0210	5.10148	26.4674	1.65762	Phyllostachys_edulis_newGene_57679	1.25869	0	12.1153
														PH01002370G0230	1.53417	4.68707	0	Phyllostachys_edulis_newGene_58123	1.44291	0	3.85941
														PH01002400G0180	8.57317	51.3808	3.47418	Phyllostachys_edulis_newGene_58873	6.0293	0.610402	14.0641
														PH01002441G0010	3.55459	51.9744	1.60562	Phyllostachys_edulis_newGene_60170	18.3216	0.044094	41.0506
														PH01002498G0210	2.09002	13.4363	0.16093	Phyllostachys_edulis_newGene_61100	1.62588	0.370354	6.65639
														PH01002513G0060	1.56158	5.43788	0.078822	Phyllostachys_edulis_newGene_61290	7.69348	0.532247	17.4489
														PH01002584G0110	12.0403	131.161	0.334337	Phyllostachys_edulis_newGene_61320	5.18582	1.57851	11.6806
														PH01002624G0190	1.18381	20.3981	0.033724	Phyllostachys_edulis_newGene_62550	4.77393	0	14.7576
														PH01002645G0080	0.773962	16.598	0.070897	Phyllostachys_edulis_newGene_63110	3.34531	0.508695	10.4919
														PH01002654G0090	6.77606	9.65788	2.94999	Phyllostachys_edulis_newGene_63311	0.687112	0	3.05797
														PH01002677G0090	30.2795	202.838	5.05908	Phyllostachys_edulis_newGene_64005	1.76712	0	8.12238
														PH01002719G0190	8.67213	52.6227	4.45784	Phyllostachys_edulis_newGene_64990	1.59643	0.182934	4.95545
														PH01002810G0020	426.27	1540.87	156.289	Phyllostachys_edulis_newGene_65131	3.07417	0.875269	7.0906
														PH01002829G0130	2.12847	5.17258	0.285259	Phyllostachys_edulis_newGene_65563	27.1273	9.7549	52.3103
														PH01002973G0070	0.569826	27.5728	0.011242	Phyllostachys_edulis_newGene_65571	1.92196	0	4.82077
														PH01002992G0190	3.17808	37.2067	0.291037	Phyllostachys_edulis_newGene_66178	8.96684	0.716015	15.5399
														PH01003023G0300	15.7704	76.5299	4.14562	Phyllostachys_edulis_newGene_67375	0.49381	0	1.93769
														PH01003082G0030	0.665026	28.5282	0.245034	Phyllostachys_edulis_newGene_67508	2.47032	0	7.7664
														PH01003109G0070	0.441942	3.11253	0	Phyllostachys_edulis_newGene_68529	1.6576	0.514388	9.19139
														PH01003149G0030	4.2245	98.4393	1.16736	Phyllostachys_edulis_newGene_71008	21.1888	85.2868	45.5605
														PH01003162G0260	0.734883	10.4156	0.119531	Phyllostachys_edulis_newGene_73310	0.868491	0	2.62282
														PH01003169G0040	4.15844	28.9643	0.457913	Phyllostachys_edulis_newGene_73678	0.687812	0.064643	3.01955
														PH01003206G0110	238.147	1743.25	88.9139	Phyllostachys_edulis_newGene_743	17.6256	0	46.8592
														PH01003226G0090	0.725803	9.87857	0	Phyllostachys_edulis_newGene_74984	2.19292	0	5.00844
														PH01003235G0160	3.78367	10.7258	1.28494	Phyllostachys_edulis_newGene_74988	2.78013	0	6.07405
														PH01003425G0070	35.6984	60.1672	12.786	Phyllostachys_edulis_newGene_78462	58.7869	0.217828	5.19733
														PH01003491G0050	33.1993	283.214	4.29775	Phyllostachys_edulis_newGene_78551	4.59463	0	14.2307
														PH01003493G0040	1.76272	36.5871	0	Phyllostachys_edulis_newGene_78812	236.185	0.516885	460.642
														PH01003525G0010	0.585017	4.44232	0.028452	Phyllostachys_edulis_newGene_79701	0.877297	0	2.51358
														PH01003558G0070	192.376	76.6061	26.5717	Phyllostachys_edulis_newGene_82323	7.03711	0	16.3251
														PH01003644G0100	1.57368	9.08106	0.539188	Phyllostachys_edulis_newGene_83113	4.87934	0	16.3251
														PH01003660G0120	30.8729	143.507	10.8377	Phyllostachys_edulis_newGene_83220	5.77965	0.197082	13.4569
														PH01003663G0210	4.00175	39.626	1.37533	Phyllostachys_edulis_newGene_86760	2.67413	0.29683	5.62507
														PH01003789G0080	0.184347	10.8082	0	Phyllostachys_edulis_newGene_88268	0.289288	0	1.53235
														PH01003820G0150	1.50208	41.9897	0.021489	Phyllostachys_edulis_newGene_9370	2.25429	0	6.11934
														PH01003875G0020	1.4976	10.4072	0.160466	Phyllostachys_edulis_newGene_9381	1.54045	0	3.08154
														PH01004007G0070	1.96134	5.46154	0.438703	Phyllostachys_edulis_newGene_9402	2.89811	0	9.00717
														PH01004026G0140	1.94065	3.35139	0.078971	PH01003126G0080	1.38604	0	7.85009
														PH01004171G0020	2.61397	5.36639	0.108757	PH01000701G0250	7.43727	2.49344	25.7531
														PH01004196G0020	0.981624	2.1604	0.015626	Phyllostachys_edulis_newGene_46759	5.82568	0	35.4046
														PH01004430G0040	0.327374	1.57324	0	PH01002561G0120	0.860322	0	15.8249
														PH01004604G0090	2.5912	12.4069	0.065924	PH01001213G0550	3.93771	0	27.2875
														PH01004620G0010	0.88676	3.76903	0.124779	PH01000009G2590	17.2221	0.100064	40.718
														PH01004834G0110	3.42245	9.77634	0.833687	PH01001498G0080	0.645546	0	1.26126
														PH01005193G0070	1.68276	5.82869	0.288767	Phyllostachys_edulis_newGene_75168	2.48125	0	16.5492
														PH01005277G0030	0.600145	3.15606	0.062238	PH01002462G0030	2.05618	0.680765	3.77701
														PH01005325G0010	2.51073	12.4265	1.01853	Phyllostachys_edulis_newGene_78438	7.99217	2.73536	16.1874
														PH01005397G0010	5.42662	15.488	0.963012	PH01002777G0140	3.24615	0	6.39961
														PH01005403G0070	2.96317	9.86238	0.031772	PH01000189G0260	4.1373	0	14.3652
														PH01005410G0120	0.32872	22.4413	0	PH01000097G1350	1.12807	0	4.12906
														PH01005467G0050	34.7712	125.795	11.7397	PH01003357G0120	11.5438	0.038801	25.3402
														PH01005545G0080	5.07798	12.6316	0	Phyllostachys_edulis_newGene_47436	1.56914	1.2268	4.29597
														PH01005704G0040	8.24004	35.8284	1.87256	Phyllostachys_edulis_newGene_29166	20.1918	0.000256	43.8823
														PH01005712G0040	3.76235	28.1543	0.226706	Phyllostachys_edulis_newGene_55753	3.91962	0	6.92787
														PH01005790G0010	5.12171	17.4676	0.933619	PH01000642G0890	3.63467	0.967782	15.3663
														PH01005903G0040	19.7075	93.7568	7.65787	PH01001648G0180	32.5288	0	11.5549
														PH01007587G0040	7.38302	27.8835	3.09337	Phyllostachys_edulis_newGene_55830	1.24097	0.112935	2.85845
														PH01008511G0020	21.6304	9.7166	0.079481	PH01005562G0100	5.30366	0.253143	10.8868
														PH01168019G0010	6.14597	44.487	0.379383	PH01004034G0090	6.32574	0	12.2816
														PH01185870G0010	4.48983	9.06134	0.816648	PH01006055G0040	41.0266	1.91658	124.044
														PH01218759G0010	11.9178	32.9919	5.89236	PH01000004G0870	2.4566	0	5.01555
														Phyllostachys_edulis_newGene_12480	3.60469	163.42	0	PH01000029G0270	5.64597	0	15.3173
														Phyllostachys_edulis_newGene_2479	1.84583	7.68541	0.525009	PH01000051G0520	89.6024	0.589264	193.901
														Phyllostachys_edulis_newGene_25465	2.49903	4.21243	0.265422	PH01000114G0030	4.74819	0.808549	10.2207
														Phyllostachys_edulis_newGene_27307	3.13268	45.2891	1.37234	PH01004637G0120	12.8207	0.290292	26.9642
														Phyllostachys_edulis_newGene_27308	5.47028	12.7561	1.12094	PH01000028G1110	0.932514	0.170578	2.05758
														Phyllostachys_edulis_newGene_29325	1.45218	13.9332	0.227542	PH01002067G0020	0.511853	0.05723	1.7727
														Phyllostachys_edulis_newGene_32209	2.37032	56.2873	0.257339	Phyllostachys_edulis_newGene_51724	3.49055	0.406515	8.4626
														Phyllostachys_edulis_newGene_32885	6.40441	263.87	1.73908	Phyllostachys_edulis_newGene_23292	1.94075	0	30.5322
														Phyllostachys_edulis_newGene_34233	6.33538	87.8108	3.53334	Phyllostachys_edulis_newGene_2484	2.51073	0.270566	31.3196
														Phyllostachys_edulis_newGene_35813	2.13987	6.78487	0.731247	Phyllostachys_edulis_newGene_72142	1.19821	0	4.84951
														Phyllostachys_edulis_newGene_36695	2.72987	62.7368	0.054341	PH01001038G0420	3.10398	0	20.4797
														Phyllostachys_edulis_newGene_40864	1.93348	9.1115	0.166387	PH01000837G0060	23.855	0	51.4965
														Phyllostachys_edulis_newGene_40885	2.7264	8.19195	1.28613	PH01000357G0810	2.19946	0	13.1446
														Phyllostachys_edulis_newGene_40924	13.7369	365.24	3.08003	PH01000000G0980	9.10972	4.27694	19.0392
														Phyllostachys_edulis_newGene_43440	0.83507	15.4379	0	PH01000838G0370	1.1577	0.315503	7.77067
														Phyllostachys_edulis_newGene_43997	5.779	14.3932	0.750638	PH01001958G0300	1.40026	0.263562	3.15659
														Phyllostachys_edulis_newGene_45733	1.56095	5.79428	0	Phyllostachys_edulis_newGene_66843	0.569724	0	2.58763
														Phyllostachys_edulis_newGene_50951	0.927494	1.76984	0.036118	PH01003385G0010	1.12555	30.9977	3.57203
														Phyllostachys_edulis_newGene_52562	4.74202	60.8445	1.95658	PH01000960G0480	0.580835	0	1.77279
														Phyllostachys_edulis_newGene_54217	2.31691	39.4864	0.80454	Phyllostachys_edulis_newGene_72141	84.2128	0	25.3552
														Phyllostachys_edulis_newGene_55025	0.955192	24.947	0	PH01004304G0100	14.0625	0	28.3431
														Phyllostachys_edulis_newGene_57350	7.40572	68.0586	3.37275	Phyllostachys_edulis_newGene_22099	2.34081	0.131189	9.17462
														Phyllostachys_edulis_newGene_58441	2.30395	6.53789	0	PH01003711G0200	6.17633	0.705013	19.3454
														Phyllostachys_edulis_newGene_59043	3.98221	37.6955	0.65734	Phyllostachys_edulis_newGene_61858	5.62885	0.035312	15.8488
														Phyllostachys_edulis_newGene_61725	2.01417	7.37284	0.439663	PH01251073G0010	7.07282	0	24.0597
														Phyllostachys_edulis_newGene_63003	5.76953	107.714	2.17866	PH01001353G0020	10.9424	1.55727	23.1041
														Phyllostachys_edulis_newGene_64221	5.62015	14.6483	2.10606	PH01000479G0320	12.3015	0	34.0773
														Phyllostachys_edulis_newGene_64957	3.16873	21.4256	0.463748	PH01001608G0440	4.90589	0	21.1493
														Phyllostachys_edulis_newGene_69390	2.70506	14.9372	0.525974	PH01000427G0500	1.11951	0	4.92617
														Phyllostachys_edulis_newGene_70407	5.08958	231.793	0.112804	Phyllostachys_edulis_newGene_52602	2.04877	0	9.08391
														Phyllostachys_edulis_newGene_72458	4.9242	13.3217	1.74102	Phyllostachys_edulis_newGene_48954	1.17028	0	2.96838
														Phyllostachys_edulis_newGene_73654	1.53498	14.8234	0.605503	PH01000052G1030	16.2384	0	38.7678
														Phyllostachys_edulis_newGene_74811	0.986635	4.7795	0.217513	PH01003910G0060	2.5507	0.084111	7.43751
														Phyllostachys_edulis_newGene_76190	4.20665	21.4514	0.581684	PH01000445G0310	1.50685	0	2.73367
														Phyllostachys_edulis_newGene_79236	56.8842	326.717	23.8289	Phyllostachys_edulis_newGene_35901	0.812954	0	3.82903
														Phyllostachys_edulis_newGene_79939	1.19824	11.8338	0.069943	Phyllostachys_edulis_newGene_34490	4.95346	0	13.2406
														Phyllostachys_edulis_newGene_80580	18.0611	197.628	5.97687	Phyllostachys_edulis_newGene_30366	6.70908	0	16.8462
														Phyllostachys_edulis_newGene_81214	2.84998	14.8133	0.288501	PH01000304G0760	11.8322	0.082891	26.6929
														Phyllostachys_edulis_newGene_83475	8.91884	78.0171	3.78168	PH01003868G0020	5.05145	0.436759	11.8163
														Phyllostachys_edulis_newGene_83677	0.794274	81.306	0	PH01002336G0240	12.5724	0	46.8014
														Phyllostachys_edulis_newGene_84491	13.7607	98.0179	3.18558	Phyllostachys_edulis_newGene_60248	8.80741	0	27.4236
														Phyllostachys_edulis_newGene_88405	2.55463	35.9206	0.954541	Phyllostachys_edulis_newGene_86840	5.79064	0	17.5607
																		PH01000173G1130	2.5038	0.823279	8.485
																		Phyllostachys_edulis_newGene_45224	1.63499	0	7.95512
																		Phyllostachys_edulis_newGene_25649	71.6564	0	220.03
																		Phyllostachys_edulis_newGene_18008	0.596011	0	2.18653
																		Phyllostachys_edulis_newGene_54622	20.7485	0.338541	52.4469
																		PH01164434G0010	0.915711	0	26.491
																		Phyllostachys_edulis_newGene_48849	0.902788	0	2.66808
																		Phyllostachys_edulis_newGene_76028	2.88546	0	109.689
																		Phyllostachys_edulis_newGene_62523	4.12785	0.113368	26.3254
																		PH01000055G1320	1.28374	0	8.22175
																		Phyllostachys_edulis_newGene_66712	2.77312	0.20794	27.6227
																		Phyllostachys_edulis_newGene_69661	9.26032	0	25.0018
																		Phyllostachys_edulis_newGene_87232	23.2773	5.2859	35.5434
																		PH01000642G0850	2.01047	0	6.00131
																		Phyllostachys_edulis_newGene_75169	1.0875	0	3.48554
																		Phyllostachys_edulis_newGene_47161	4.19468	1.44144	9.47762
																		Phyllostachys_edulis_newGene_86609	3.5846	0	13.5857
																		Phyllostachys_edulis_newGene_33598	0.835129	0.06638	63.0788
																		Phyllostachys_edulis_newGene_40788	21.4601	1.29674	47.2852
																		Phyllostachys_edulis_newGene_38155	1.63004	0.07822	4.17849
																		PH01001967G0220	13.4558	0	30.7932
																		PH01000371G0150	26.346	0.241602	53.7083
																		PH01000489G0730	17.4564	0	6.19586
																		Phyllostachys_edulis_newGene_27595	6.49348	0	13.9195
																		PH01000103G1450	9.79147	0	23.6391
																		Phyllostachys_edulis_newGene_17730	1.41973	0	2.8405
																		PH01000781G0220	7.16026	0	18.7025
																		Phyllostachys_edulis_newGene_57907	3.06215	0	7.24005
																		Phyllostachys_edulis_newGene_8787	1.43555	0	4.29507
																		Phyllostachys_edulis_newGene_78109	14.4728	0.47809	28.3044
																		PH01000540G0860	6.79555	0	14.5632
																		PH01000041G0830	23.6769	0	76.1726
																		Phyllostachys_edulis_newGene_47249	7.86433	0	21.4654
																		PH01001800G0280	8.84048	0	18.5525
																		PH01003210G0230	2.67709	0	9.85224
																		PH01000015G2850	2.75592	0	7.1049
																		PH01000226G0670	12.4443	0	25.6249
																		Phyllostachys_edulis_newGene_41657	4.93515	0	17.6598
																		Phyllostachys_edulis_newGene_24451	10.4685	0	28.5319
																		Phyllostachys_edulis_newGene_29470	2.37201	0	4.3397
																		PH01000536G0430	4.36461	0	10.7334
																		PH01001695G0270	2.04005	0	4.51346
																		Phyllostachys_edulis_newGene_68678	2.60169	0.600147	6.16161
																		Phyllostachys_edulis_newGene_2514	0.960021	0	4.09973
																		PH01001932G0350	3.80925	0	5.44363
																		PH01000568G0640	2.25351	0.549607	5.67017
																		PH01003800G0070	0.731762	0	2.05559
																		PH01002950G0300	1.81245	0	5.73864
																		Phyllostachys_edulis_newGene_36863	4.13277	0.694772	10.3008
																		PH01002354G0070	2.33272	0	11.5163
																		PH01000041G1650	1.50032	0.087615	3.6776
																		PH01001722G0420	0.558932	0	1.77403
																		PH01000891G0420	31.6127	0.182831	87.5128
																		Phyllostachys_edulis_newGene_82939	7.28802	0	20.7567
																		PH01000021G0190	3.00955	0	9.28006
																		PH01035718G0010	1.91548	0	4.33729
																		PH01000130G1140	0.901184	0	2.90112
																		Phyllostachys_edulis_newGene_72541	2.94397	0	63.2746
																		Phyllostachys_edulis_newGene_66564	5.60334	0	10.1102
																		Phyllostachys_edulis_newGene_2358	1.83185	0	9.31513
																		Phyllostachys_edulis_newGene_73989	1.63768	0	6.63303
																		PH01004885G0050	2.64536	0	12.3064
																		PH01004761G0020	1.00328	0	1.77414
																		Phyllostachys_edulis_newGene_79333	2.71599	0	6.56111
																		Phyllostachys_edulis_newGene_63781	2.04156	0	10.7317
																		PH01000064G1900	7.94352	0.404782	22.0154
																		PH01000845G0110	3.44477	0	9.15276
																		Phyllostachys_edulis_newGene_46650	1.4465	0	6.61787
																		PH01000097G1770	1.88865	0	4.70443
																		PH01007660G0010	1.20676	0	7.67951
																		PH01003836G0090	2.9461	0.033899	6.21527
																		Phyllostachys_edulis_newGene_51958	0.847486	0	1.60919
																		Phyllostachys_edulis_newGene_39411	3.19694	0	11.0111
																		PH01000319G0220	0.883115	0	3.29764
																		PH01002445G0270	2.85235	0	6.24429
																		PH01000628G0330	1.22501	0.183118	4.2165
																		PH01000054G0290	1.44561	0	3.19309
																		Phyllostachys_edulis_newGene_41632	0.79328	0	2.05104
																		Phyllostachys_edulis_newGene_70340	1.79202	0	5.88613
																		PH01000511G1000	9.13668	0	15.8117
																		PH01004741G0050	9.09685	0.947219	18.861
																		PH01000278G0970	2.23948	0	9.56733
																		Phyllostachys_edulis_newGene_42521	3.71909	0	8.30855
																		PH01000076G2050	0.803059	0	1.9665
																		Phyllostachys_edulis_newGene_41855	0.181226	0	6.35407
																		PH01000533G0270	1.27035	0	2.82989
																		PH01000533G0200	6.73821	0.642511	17.9194
																		PH01000309G1270	0.615459	0	3.29098
																		PH01162702G0010	1.09416	0	4.00005
																		PH01001262G0260	1.55951	0	7.4593
																		Phyllostachys_edulis_newGene_59780	1.32781	0.114569	4.81362
																		PH01000139G0430	2.84696	0	7.05852
																		Phyllostachys_edulis_newGene_69614	1.16657	0	3.81765
																		Phyllostachys_edulis_newGene_51965	15.5224	1.01636	45.6212
																		Phyllostachys_edulis_newGene_11636	1.74107	0	12.9903
																		PH01000097G0110	21.2377	2.183	42.9269
																		PH01000358G0330	0.323672	0	0.890676
																		PH01001523G0110	2.38868	0.029997	5.20742
																		PH01000501G0450	1.56947	0	4.47168
																		PH01000028G1310	0.414546	0	1.31546
																		PH01000912G0060	1.53666	0	6.00312
																		PH01000511G0150	7.30275	0	20.8414
																		Phyllostachys_edulis_newGene_24315	4.94242	0	13.9704
																		PH01000226G0100	1.21465	0	1.85705
																		PH01000261G1080	4.36093	0	7.78891
																		PH01000173G0630	14.484	1.44624	51.1288
																		Phyllostachys_edulis_newGene_86568	2.22599	0	6.69294
																		PH01000182G0380	4.40127	0	7.21142
																		PH01000825G0300	5.4713	0	16.7952
																		Phyllostachys_edulis_newGene_30293	1.03187	0	9.4562
																		Phyllostachys_edulis_newGene_40202	4.93598	0.281693	10.4881
																		Phyllostachys_edulis_newGene_32140	4.29801	0	8.34066
																		PH01000022G1700	8.1987	0	1.37614
																		PH01000134G0110	14.0473	4.777	27.9079
																		PH01002938G0080	4.9684	0	8.82752
																		PH01001724G0410	0.9947	0	2.84943
																		Phyllostachys_edulis_newGene_70223	0.650328	0	4.30952
																		Phyllostachys_edulis_newGene_69606	1.40222	19.3645	2.48424
																		Phyllostachys_edulis_newGene_57275	5.10438	0	15.8642
																		PH01001798G0420	5.63803	0	16.319
																		Phyllostachys_edulis_newGene_78500	2.69041	0	6.587
																		PH01001973G0150	2.31268	0	5.03157
																		PH01001128G0130	1.39031	0	5.00177
																		PH01000417G0100	0.538049	0	3.65523
																		PH01000778G0480	0.447353	0	2.44217
																		PH01001197G0140	2.34362	0	3.56552
																		Phyllostachys_edulis_newGene_50337	2.31429	0	7.64424
																		PH01003393G0080	5.20055	0.087846	13.7388
																		Phyllostachys_edulis_newGene_52991	0.376006	0	4.4307
																		Phyllostachys_edulis_newGene_67050	0.501411	0	1.68765
																		PH01000136G0790	4.58497	0	17.9694
																		PH01002296G0110	3.46164	0	8.37186
																		Phyllostachys_edulis_newGene_76723	2.23223	0	27.4685
																		Phyllostachys_edulis_newGene_56393	10.674	0	25.508
																		PH01001492G0340	3.78686	0	14.1849
																		PH01005385G0130	0.700902	0	7.27319
																		PH01001487G0030	1.8541	0	3.46108
																		Phyllostachys_edulis_newGene_47890	1.42943	0	3.09834
																		Phyllostachys_edulis_newGene_52798	1.6467	0.112248	4.45727
																		PH01000548G0730	3.98639	0	10.3445
																		PH01000909G0340	3.34092	0	8.10267
																		Phyllostachys_edulis_newGene_79969	1.86733	0	5.7844
																		Phyllostachys_edulis_newGene_71582	2.77704	0	15.8468
																		Phyllostachys_edulis_newGene_12028	1.78097	0	4.83509
																		Phyllostachys_edulis_newGene_86929	4.43694	0	12.1636
																		Phyllostachys_edulis_newGene_57441	3.43584	1.0935	6.99668
																		PH01000327G0330	12.6045	0.378558	31.3849
																		PH01000004G4460	8.9848	0	22.5558
																		PH01000347G0570	3.48233	0	7.94207
																		Phyllostachys_edulis_newGene_31272	0.934434	0	6.32226
																		PH01000596G0450	0.578822	0	1.53051
																		Phyllostachys_edulis_newGene_28877	0.729158	0	2.4523
																		Phyllostachys_edulis_newGene_27385	2.33656	0	4.59054
																		Phyllostachys_edulis_newGene_73569	4.25414	0	9.34934
																		Phyllostachys_edulis_newGene_31365	5.27921	0	15.6183
																		PH01000141G1320	7.5785	0.518642	36.8371
																		Phyllostachys_edulis_newGene_85614	2.68663	0.37622	36.4879
																		PH01003284G0180	4.01439	0	9.13312
																		PH01002944G0150	0.450457	0	1.86332
																		PH01000129G0840	2.90019	0	6.84816
																		PH01003277G0140	2.3262	0	5.04232
																		Phyllostachys_edulis_newGene_70392	0.925553	0.062812	2.01698
																		PH01001791G0500	2.83996	0	12.3519
																		Phyllostachys_edulis_newGene_3102	3.20529	0	6.88636
																		PH01000405G0510	3.67387	0	20.5548
																		PH01001830G0080	6.38535	0.215955	18.5218
																		PH01004625G0060	0.235898	0	0.653334
																		PH01001209G0390	2.93897	0.48728	6.45201
																		Phyllostachys_edulis_newGene_45787	29.0822	0.110851	65.3128
																		Phyllostachys_edulis_newGene_87933	0.475154	0	1.2545
																		Phyllostachys_edulis_newGene_70964	2.245	0	9.60105
																		Phyllostachys_edulis_newGene_54398	5.49117	0	19.0469
																		Phyllostachys_edulis_newGene_77273	1.0691	0.075151	3.59125
																		PH01002213G0250	0.561808	0	2.63088
																		PH01000417G0900	1.79528	0	4.72113
																		Phyllostachys_edulis_newGene_32057	1.76859	0	5.95114
																		Phyllostachys_edulis_newGene_41569	2.17236	0	3.78795
																		Phyllostachys_edulis_newGene_32119	1.06848	0	2.46282
																		Phyllostachys_edulis_newGene_72545	45.9657	0	3.79701
																		PH01000586G0870	10.702	4.23013	18.6702
																		PH01000140G1280	9.73375	0	3.89583
																		PH01000276G1080	0.679326	0	1.94196
																		PH01000606G0250	2.60298	0	5.55233
																		PH01000122G0020	1.66402	0	8.07444
																		Phyllostachys_edulis_newGene_31434	10.6308	0	70.8762
																		Phyllostachys_edulis_newGene_12768	9.41204	0	93.5912
																		Phyllostachys_edulis_newGene_70132	2.37528	0	3.34201
																		Phyllostachys_edulis_newGene_77133	1.73821	0	3.75491
																		PH01001294G0180	0.743611	0	1.30525
																		Phyllostachys_edulis_newGene_40480	1.60247	0	6.19146
																		PH01084942G0010	9.76509	0	27.8448
																		Phyllostachys_edulis_newGene_36064	12.6411	1.61212	58.5468
																		PH01002335G0340	25.4217	10.3123	83.1389
																		Phyllostachys_edulis_newGene_38380	15.4123	0	30.3796
																		PH01000327G0350	7.19909	0	14.4198
																		PH01000098G0730	2.43422	0	4.95688
																		PH01002290G0110	1.35681	0	2.44553
																		PH01198176G0010	1.69284	0	7.04524
																		PH01000016G1040	1.95912	0	3.96106
																		Phyllostachys_edulis_newGene_36609	0.382826	0	0.985476
																		PH01002041G0310	5.64686	0	14.4742
																		PH01002113G0300	1.87886	0	4.08619
																		PH01000244G0580	7.95429	0	26.8124
																		PH01000588G0680	16.8457	0	45.6603
																		PH01000639G0270	5.15751	0	15.44
																		PH01002823G0110	3.31091	0	11.4029
																		Phyllostachys_edulis_newGene_55881	1.1422	0	6.33348
																		PH01000429G1070	0.785155	0	3.71305
																		Phyllostachys_edulis_newGene_75367	1.8653	0	4.37603
																		Phyllostachys_edulis_newGene_41473	0.724394	0	2.52644
																		Phyllostachys_edulis_newGene_42341	5.9443	0.113221	11.702
																		PH01000295G0700	0.834211	0	4.47819
																		PH01002528G0290	2.63918	0	7.07882
																		PH01000788G0270	6.00332	0	14.6735
																		PH01004006G0090	2.66556	0	11.5446
																		PH01002880G0130	48.9987	0	112.937
																		PH01001638G0130	2.52584	0	8.07804
																		Phyllostachys_edulis_newGene_26131	5.35578	0.463194	14.6849
																		PH01001009G0010	0.949751	0	27.1018
																		PH01003580G0100	9.81459	0	27.7671
																		PH01003914G0150	2.01884	0	4.77839
																		Phyllostachys_edulis_newGene_37198	1.64513	0	3.89916
																		PH01001223G0200	14.7311	0	46.334
																		Phyllostachys_edulis_newGene_53917	2.04501	0	24.7049
																		Phyllostachys_edulis_newGene_37444	1.44206	0	3.07898
																		Phyllostachys_edulis_newGene_66413	1.43293	0	3.9222
																		Phyllostachys_edulis_newGene_57504	2.48033	0.033604	5.61851
																		Phyllostachys_edulis_newGene_47732	5.26741	0.47919	10.1306
																		Phyllostachys_edulis_newGene_55861	3.57254	0	7.89263
																		Phyllostachys_edulis_newGene_60249	1.18863	0	2.34194
																		Phyllostachys_edulis_newGene_25294	4.42948	0	8.90113
																		PH01000193G1280	1.09571	0	3.08698
																		PH01000589G0300	17.9582	0	40.9199
																		PH01000026G1780	2.3893	0	8.42628
																		Phyllostachys_edulis_newGene_50338	1.13462	0	4.89667
																		Phyllostachys_edulis_newGene_34270	10.0856	0.609263	16.7581
																		PH01000134G0950	13.0042	0	25.8383
																		Phyllostachys_edulis_newGene_71273	4.00982	0.231979	12.7976
																		Phyllostachys_edulis_newGene_73867	3.68808	0	7.76352
																		Phyllostachys_edulis_newGene_87934	1.47695	0	6.47845
																		Phyllostachys_edulis_newGene_71153	24.5685	0	143.983
																		PH01000515G0560	8.39017	0	32.5004
																		Phyllostachys_edulis_newGene_53180	1.41548	0	4.27463
																		Phyllostachys_edulis_newGene_52153	2.47638	0	13.3952
																		Phyllostachys_edulis_newGene_61296	3.51422	0	8.43598
																		PH01003141G0090	1.26069	0	2.90173
																		PH01000471G0250	1.45166	0	5.03054
																		PH01000703G0460	3.22436	0	6.31963
																		PH01000850G0320	2.63509	0	8.75105
