# Supplementary material for: Differential transcriptome analysis and identification of genes related to resistance to blight in three varieties of Bambusa pervariabilis × Dendrocalamopsis grandis
Source: PeerJ. 2021 Oct 18;9:e12301. doi: 10.7717/peerj.12301 (PMC8530093; doi:10.7717/peerj.12301)
Supplement: Supplemental Information 3 [file peerj-09-12301-s003.xlsx]

## Sheet: S2
article title：Differential transcriptome analysis and identification of genes related to resistance to blight in three species of Bambusa pervariabilis × Dendrocalamopisis grandis author names：Fengying Luo1†, Xinmei Fang1†, Han Liu2, Tianhui Zhu1, Shan Han1, Qi Peng1, Shujiang Li1,3* e-mail address of the corresponding author: 14087@sicau.edu.cn
Table S3 The DEGs among different varieties inoculated with sterile water.
S3 vs S6		S3 vs S8		S6 vs S8
id	logFC	id	logFC	id	logFC
PH01000279G0080	-9.11618	PH01001778G0130	-9.64678	Phyllostachys_edulis_newGene_87078	-5.33682
Phyllostachys_edulis_newGene_86451	-6.97746	PH01002127G0220	-6.65812	Phyllostachys_edulis_newGene_41775	-4.38248
Phyllostachys_edulis_newGene_18008	-6.86755	Phyllostachys_edulis_newGene_27814	-6.37333	Phyllostachys_edulis_newGene_3109	-5.97241
PH01000330G0380	-6.9575	Phyllostachys_edulis_newGene_6415	-4.26397	PH01000035G1760	-3.87008
PH01002127G0220	-6.61853	Phyllostachys_edulis_newGene_75068	-5.88589	Phyllostachys_edulis_newGene_58069	-5.20574
Phyllostachys_edulis_newGene_74576	-7.39376	PH01000373G0550	-7.07296	Phyllostachys_edulis_newGene_26788	-3.18208
PH01000846G0450	-5.65467	Phyllostachys_edulis_newGene_74797	-4.13236	PH01001805G0390	-4.32113
PH01000051G1290	-6.21527	PH01000009G2390	-4.71804	PH01000287G0850	-4.39678
Phyllostachys_edulis_newGene_26713	-6.3118	PH01000035G1760	-6.99771	PH01000737G0140	-2.99288
Phyllostachys_edulis_newGene_50248	-5.2709	PH01006029G0090	-5.69309	PH01000949G0040	-4.24783
PH01004067G0120	-6.85223	Phyllostachys_edulis_newGene_61327	-6.54914	PH01000032G0810	-3.36598
PH01000485G0330	-5.26735	Phyllostachys_edulis_newGene_73138	-3.66396	PH01004200G0090	-3.87
PH01006208G0020	-8.13533	PH01000947G0320	-3.69431	Phyllostachys_edulis_newGene_26766	-6.35465
PH01004452G0080	-6.46084	Phyllostachys_edulis_newGene_39010	-3.8205	PH01002347G0080	-5.63681
PH01005973G0040	-6.29367	Phyllostachys_edulis_newGene_61326	-6.01721	Phyllostachys_edulis_newGene_15864	-2.76718
PH01001730G0080	-7.04629	Phyllostachys_edulis_newGene_19254	-3.20487	PH01000416G0200	-2.59489
PH01000097G0840	-4.86714	Phyllostachys_edulis_newGene_42063	-3.30941	PH01269761G0010	-4.81243
Phyllostachys_edulis_newGene_27318	-4.81854	PH01001090G0180	-5.49511	PH01001444G0130	-2.83994
PH01161657G0010	-5.83643	PH01000297G0140	-5.03559	PH01000087G0190	-2.92665
Phyllostachys_edulis_newGene_65647	-5.70962	Phyllostachys_edulis_newGene_71956	-2.86155	Phyllostachys_edulis_newGene_13289	-4.47352
PH01001262G0330	-4.83048	PH01003937G0060	-3.60153	PH01146554G0010	-3.89681
Phyllostachys_edulis_newGene_74742	-4.67518	PH01000397G0450	-2.85801	PH01001166G0210	-2.88619
Phyllostachys_edulis_newGene_64289	-5.01423	PH01001730G0080	-6.04936	Phyllostachys_edulis_newGene_53776	-4.68959
PH01003385G0010	-4.94157	Phyllostachys_edulis_newGene_87286	-4.71566	PH01003320G0070	-5.14585
Phyllostachys_edulis_newGene_34109	-6.99898	Phyllostachys_edulis_newGene_42062	-5.40876	Phyllostachys_edulis_newGene_64671	-2.26098
Phyllostachys_edulis_newGene_65076	-6.23963	PH01001244G0260	-2.77121	Phyllostachys_edulis_newGene_72213	-3.00677
Phyllostachys_edulis_newGene_87809	-4.42958	PH01005233G0060	-4.10027	PH01000209G0300	-2.39059
Phyllostachys_edulis_newGene_57841	-5.62523	PH01003971G0130	-4.14996	PH01002984G0040	-2.71741
Phyllostachys_edulis_newGene_2484	-4.37549	PH01001892G0210	-3.55012	PH01002440G0190	-3.31259
PH01002229G0070	-4.27588	Phyllostachys_edulis_newGene_1656	-3.72781	PH01000164G0530	-2.2279
Phyllostachys_edulis_newGene_41527	-4.46108	PH01003110G0170	-3.34643	Phyllostachys_edulis_newGene_85507	-4.24439
PH01002437G0140	-4.69216	Phyllostachys_edulis_newGene_26713	-3.02295	Phyllostachys_edulis_newGene_47851	-5.09092
PH01001038G0160	-4.37598	Phyllostachys_edulis_newGene_47129	-2.47949	Phyllostachys_edulis_newGene_54342	-2.11597
PH01003971G0130	-4.13492	Phyllostachys_edulis_newGene_87377	-5.0114	PH01001504G0250	-2.49514
PH01006055G0040	-4.61569	PH01005134G0090	-2.80844	Phyllostachys_edulis_newGene_31396	-4.82262
PH01000505G0760	-4.66996	PH01002809G0020	-2.31907	Phyllostachys_edulis_newGene_79182	-3.47912
Phyllostachys_edulis_newGene_33753	-4.69083	Phyllostachys_edulis_newGene_61253	-3.76045	PH01213102G0010	-2.44357
Phyllostachys_edulis_newGene_67444	-4.7001	PH01000560G0040	-4.46074	PH01000144G1120	-1.97354
Phyllostachys_edulis_newGene_62474	-5.54315	Phyllostachys_edulis_newGene_56934	-2.12939	PH01001359G0120	-2.92572
PH01001038G0420	-5.02589	PH01001371G0200	-3.371	PH01000002G2300	-2.95013
Phyllostachys_edulis_newGene_49068	-7.15806	Phyllostachys_edulis_newGene_74398	-3.13729	Phyllostachys_edulis_newGene_52562	-2.31012
Phyllostachys_edulis_newGene_48689	-4.07144	Phyllostachys_edulis_newGene_55141	-2.81241	PH01000012G1020	-3.55474
Phyllostachys_edulis_newGene_6415	-3.91854	Phyllostachys_edulis_newGene_45275	-2.18584	PH01000025G1630	-2.35617
PH01000573G0640	-5.74129	Phyllostachys_edulis_newGene_41297	-3.40566	PH01001577G0190	-2.11988
PH01000306G0980	-6.28553	PH01000130G0820	-8.46479	PH01000051G0950	-2.55293
Phyllostachys_edulis_newGene_53519	-3.74764	PH01005973G0040	-3.2318	PH01000229G1380	-2.71631
PH01000026G0510	-3.75203	Phyllostachys_edulis_newGene_45142	-2.056	PH01000727G0620	-3.52842
PH01001584G0330	-3.74388	Phyllostachys_edulis_newGene_79404	-2.49732	PH01000259G0460	-2.9528
PH01000291G0340	-3.71664	Phyllostachys_edulis_newGene_35778	-2.97113	PH01002899G0210	-1.76044
PH01001810G0250	-3.69636	PH01174643G0010	-4.60956	PH01001144G0050	-1.82942
PH01003141G0090	-4.88137	Phyllostachys_edulis_newGene_20051	-3.17551	PH01002053G0310	-2.50065
PH01000063G0570	-4.99168	PH01000632G0220	-7.14636	Phyllostachys_edulis_newGene_46169	-1.60817
PH01000823G0670	-5.71662	PH01000716G0680	-5.74689	Phyllostachys_edulis_newGene_26765	-2.73963
PH01000733G0670	-4.30415	PH01001287G0120	-2.48823	PH01000336G1090	-3.16184
Phyllostachys_edulis_newGene_11636	-3.6087	PH01000413G0560	-8.49368	PH01000019G1600	-3.52385
PH01000816G0580	-5.42535	Phyllostachys_edulis_newGene_79505	-2.2741	PH01002452G0070	-1.41135
PH01000448G0100	-3.85825	PH01000032G2110	-3.52958	Phyllostachys_edulis_newGene_20065	-2.64357
Phyllostachys_edulis_newGene_59499	-5.65573	Phyllostachys_edulis_newGene_6127	-1.69568	PH01000056G0780	-3.28556
Phyllostachys_edulis_newGene_74797	-3.77124	PH01001064G0640	-6.11659	Phyllostachys_edulis_newGene_64895	-6.89933
PH01001299G0140	-9.40133	Phyllostachys_edulis_newGene_13371	-3.50919	PH01000425G0160	-1.86898
PH01006029G0090	-7.19699	PH01000265G0010	-1.6799	PH01001605G0300	-3.92193
Phyllostachys_edulis_newGene_76371	-3.81093	PH01000558G0900	-5.09344	PH01000654G0710	-2.99539
PH01000915G0050	-3.62389	PH01000133G1150	-5.31141	PH01000062G0100	-2.61807
PH01000474G0440	-5.69417	PH01003555G0050	-3.16671	Phyllostachys_edulis_newGene_54844	-1.37555
PH01003490G0050	-3.50516	PH01007108G0040	-5.16532	Phyllostachys_edulis_newGene_35826	-5.4283
Phyllostachys_edulis_newGene_82939	-4.27631	PH01001575G0290	-3.51414	Phyllostachys_edulis_newGene_81379	-1.67035
PH01000427G0450	-5.39987	PH01000216G0810	-2.16391	Phyllostachys_edulis_newGene_74558	-2.67024
PH01000264G0610	-3.48268	Phyllostachys_edulis_newGene_36386	-1.75689	Phyllostachys_edulis_newGene_28521	-3.26631
PH01003742G0020	-4.76844	Phyllostachys_edulis_newGene_64350	-1.93047	PH01000629G0580	-1.58763
PH01000755G0170	-3.43636	Phyllostachys_edulis_newGene_73894	-1.76119	PH01002792G0300	-2.84079
PH01067864G0010	-5.61818	Phyllostachys_edulis_newGene_31743	-2.39237	PH01004029G0080	-1.50967
Phyllostachys_edulis_newGene_27814	-6.27564	PH01002347G0080	-3.32957	PH01001053G0070	-1.28986
PH01000478G0990	-3.7138	PH01000263G0270	-1.80518	PH01001816G0270	-1.2609
PH01000006G1440	-3.17659	PH01002562G0020	-2.60529	Phyllostachys_edulis_newGene_84492	-3.29281
Phyllostachys_edulis_newGene_31515	-5.30348	PH01000296G0570	-3.03849	PH01000844G0300	-1.81075
PH01005377G0030	-8.01936	PH01001596G0160	-1.83617	PH01005323G0060	-3.44393
PH01182528G0010	-3.60962	Phyllostachys_edulis_newGene_66057	-1.45198	PH01000761G0570	-2.61038
PH01001800G0280	-3.45534	PH01000361G0700	-1.85188	PH01000039G0780	-5.19239
Phyllostachys_edulis_newGene_69802	-3.1125	Phyllostachys_edulis_newGene_53382	-1.5809	PH01000464G0700	-1.31899
Phyllostachys_edulis_newGene_25862	-3.32733	PH01001387G0240	-4.02521	Phyllostachys_edulis_newGene_71467	-4.65797
PH01001167G0340	-3.59093	Phyllostachys_edulis_newGene_33212	-1.38624	PH01000652G0130	-3.07539
Phyllostachys_edulis_newGene_531	-4.77568	Phyllostachys_edulis_newGene_18882	-1.78243	PH01000083G0620	-2.50624
PH01001146G0490	-4.22378	Phyllostachys_edulis_newGene_37858	-1.4183	PH01002550G0210	-4.24669
PH01000653G0470	-4.68274	PH01003339G0020	-2.81831	PH01000215G0900	-2.77655
Phyllostachys_edulis_newGene_8305	-3.58326	Phyllostachys_edulis_newGene_84130	-1.44501	PH01001059G0450	-3.57702
PH01005037G0050	-4.93384	PH01000169G0880	-2.29378	PH01000167G0400	-3.50314
Phyllostachys_edulis_newGene_68926	-3.05472	Phyllostachys_edulis_newGene_68246	-1.69275	Phyllostachys_edulis_newGene_41321	-2.43604
Phyllostachys_edulis_newGene_73138	-3.2135	Phyllostachys_edulis_newGene_66230	-1.90775	PH01002343G0150	-1.67774
Phyllostachys_edulis_newGene_51173	-7.18176	Phyllostachys_edulis_newGene_87763	-2.34899	PH01000715G0650	-2.38115
PH01043877G0010	-4.61079	Phyllostachys_edulis_newGene_74948	-2.01271	Phyllostachys_edulis_newGene_33637	-3.34519
PH01002763G0090	-2.95365	Phyllostachys_edulis_newGene_68129	-1.77031	Phyllostachys_edulis_newGene_38227	-1.78056
PH01000421G0730	-5.08943	PH01002028G0330	-2.46758	Phyllostachys_edulis_newGene_25475	-5.35014
PH01000895G0220	-3.93016	PH01003006G0150	-2.29518	Phyllostachys_edulis_newGene_29711	-2.97576
PH01000479G0320	-5.07149	Phyllostachys_edulis_newGene_30603	-1.28948	Phyllostachys_edulis_newGene_57053	-3.53389
PH01000949G0570	-2.97793	Phyllostachys_edulis_newGene_41375	-3.04306	Phyllostachys_edulis_newGene_36990	-2.28082
PH01000174G0370	-5.42168	Phyllostachys_edulis_newGene_76121	-3.47625	PH01001785G0290	-2.74987
PH01002506G0280	-2.89976	Phyllostachys_edulis_newGene_52961	-2.35218	Phyllostachys_edulis_newGene_74645	-3.40034
Phyllostachys_edulis_newGene_71376	-2.82957	PH01001584G0330	-4.05774	PH01000003G2600	-2.32168
Phyllostachys_edulis_newGene_84721	-3.58284	PH01002310G0030	-3.58311	PH01004502G0030	-1.63715
PH01000536G0430	-3.68047	Phyllostachys_edulis_newGene_67957	-1.30475	Phyllostachys_edulis_newGene_53097	-4.98661
PH01000463G0410	-3.72062	Phyllostachys_edulis_newGene_26484	-1.35149	Phyllostachys_edulis_newGene_40430	-3.0327
Phyllostachys_edulis_newGene_67540	-3.06405	Phyllostachys_edulis_newGene_54746	-1.56926	PH01001626G0110	-1.4715
PH01000297G0030	-9.09087	PH01000269G0880	-3.75013	PH01000025G2180	-2.4758
PH01005309G0080	-3.79894	Phyllostachys_edulis_newGene_15424	-1.57163	PH01000155G0740	-4.78871
Phyllostachys_edulis_newGene_47598	-2.74957	PH01000000G2620	-1.52721	PH01002136G0140	-1.65456
Phyllostachys_edulis_newGene_39533	-2.79404	PH01002598G0120	-1.52091	PH01000750G0430	-1.90707
PH01000628G0560	-5.65844	PH01001494G0270	-1.58788	PH01000510G0100	-1.19178
Phyllostachys_edulis_newGene_79852	-3.82305	PH01000392G1020	-1.31931	PH01000336G0490	-3.89313
PH01017692G0010	-5.70781	PH01004595G0120	-2.0905	PH01002161G0010	-2.63526
PH01001038G0430	-3.21392	Phyllostachys_edulis_newGene_49464	-1.88294	PH01000447G0740	-3.36245
Phyllostachys_edulis_newGene_39010	-3.40485	Phyllostachys_edulis_newGene_9919	-2.92701	Phyllostachys_edulis_newGene_12535	-2.99857
PH01001692G0270	-2.69454	Phyllostachys_edulis_newGene_84637	-1.29304	PH01000597G0340	-2.47407
PH01000042G1600	-4.0241	PH01000041G1250	-4.76352	Phyllostachys_edulis_newGene_27894	-3.13426
Phyllostachys_edulis_newGene_68678	-3.85561	PH01000434G0720	-2.62094	PH01007108G0040	-5.90887
PH01000003G2350	-3.09235	PH01000025G1630	-2.10419	Phyllostachys_edulis_newGene_43567	-3.56172
Phyllostachys_edulis_newGene_46543	-3.92514	PH01000039G0530	-1.29984	PH01000754G0440	-2.53291
Phyllostachys_edulis_newGene_15424	-3.38156	PH01001615G0240	-4.96769	Phyllostachys_edulis_newGene_79669	-3.18047
PH01005481G0010	-3.49464	Phyllostachys_edulis_newGene_51123	-1.18944	Phyllostachys_edulis_newGene_39070	-2.24079
Phyllostachys_edulis_newGene_47065	-2.76493	Phyllostachys_edulis_newGene_64720	-1.22684	PH01000451G0660	-1.13755
PH01002980G0150	-3.05447	PH01003371G0190	-1.36063	Phyllostachys_edulis_newGene_84516	-1.49982
Phyllostachys_edulis_newGene_56995	-3.2249	PH01005237G0010	-2.98252	PH01000606G0530	-2.90858
PH01000457G0160	-7.29248	PH01000000G5960	-5.04499	PH01004866G0030	-2.8172
Phyllostachys_edulis_newGene_75068	-5.71272	PH01000205G0080	-1.34059	PH01000322G0350	-2.85954
Phyllostachys_edulis_newGene_58290	-2.98488	PH01001557G0400	-4.36097	PH01000152G1240	-1.57302
PH01000270G0210	-3.22988	Phyllostachys_edulis_newGene_69207	-1.40939	PH01002137G0030	-2.49904
Phyllostachys_edulis_newGene_60318	-3.17891	PH01005037G0050	-1.49415	Phyllostachys_edulis_newGene_56432	-4.29822
PH01000122G0020	-2.6084	Phyllostachys_edulis_newGene_46104	-4.86181	PH01002819G0060	-2.32251
PH01000012G1040	-6.82225	PH01005304G0120	-1.49155	PH01000169G0880	-3.1622
Phyllostachys_edulis_newGene_34213	-6.17064	Phyllostachys_edulis_newGene_27805	-3.75401	Phyllostachys_edulis_newGene_54380	-3.86927
Phyllostachys_edulis_newGene_28190	-3.11736	PH01002134G0230	-3.38274	PH01000092G1150	-1.74445
Phyllostachys_edulis_newGene_5268	-3.16566	PH01000849G0460	-3.07775	PH01002036G0260	-1.42287
Phyllostachys_edulis_newGene_43152	-2.65264	PH01000254G0870	-2.63055	PH01000716G0350	-3.09269
PH01000019G1840	-7.4077	PH01002045G0440	-1.55517	Phyllostachys_edulis_newGene_40713	-7.90431
Phyllostachys_edulis_newGene_66572	-3.1204	PH01000404G0960	-1.21635	PH01000101G1180	-1.62872
Phyllostachys_edulis_newGene_84458	-3.87487	Phyllostachys_edulis_newGene_43958	-2.08729	Phyllostachys_edulis_newGene_34280	-4.38833
Phyllostachys_edulis_newGene_37891	-2.49326	PH01000991G0110	-1.57462	PH01000641G0820	-2.39759
PH01001412G0340	-2.51512	PH01002182G0340	-2.93463	PH01000141G1400	-1.61419
PH01000424G0360	-4.33502	PH01001806G0200	-1.78188	PH01000036G1460	-1.63487
PH01000029G0270	-2.58669	PH01000065G1160	-2.57366	PH01000144G1610	-3.82323
PH01002457G0030	-2.78469	PH01241143G0010	-3.9183	PH01000262G0890	-3.54214
PH01001333G0120	-3.01689	PH01080423G0010	-4.62416	PH01000040G0160	-3.64571
Phyllostachys_edulis_newGene_30102	-3.83574	Phyllostachys_edulis_newGene_64486	-2.386	PH01004898G0060	-2.33843
Phyllostachys_edulis_newGene_17743	-2.43109	Phyllostachys_edulis_newGene_46543	-4.2076	PH01000650G0460	-5.07958
Phyllostachys_edulis_newGene_7870	-4.1819	Phyllostachys_edulis_newGene_81695	-3.22106	PH01000288G0820	-6.37957
PH01000082G0850	-3.45825	Phyllostachys_edulis_newGene_56142	-1.26612	PH01000014G0540	-3.40759
Phyllostachys_edulis_newGene_46431	-2.47854	PH01000964G0510	-2.70147	PH01000784G0510	-1.94417
Phyllostachys_edulis_newGene_82347	-3.21418	PH01002061G0210	-1.37232	Phyllostachys_edulis_newGene_31053	-1.21605
PH01000052G1030	-2.66402	Phyllostachys_edulis_newGene_2993	-2.01043	PH01000416G0550	-1.59349
Phyllostachys_edulis_newGene_60768	-3.12103	PH01000004G3560	-1.57019	Phyllostachys_edulis_newGene_63237	-5.43195
PH01002192G0260	-5.26626	PH01001978G0240	-1.10077	Phyllostachys_edulis_newGene_33339	-2.09544
PH01001317G0160	-5.56872	Phyllostachys_edulis_newGene_57936	-4.48223	PH01000057G0120	-2.92812
PH01001599G0310	-4.0576	Phyllostachys_edulis_newGene_80504	-1.09586	Phyllostachys_edulis_newGene_69436	-5.52924
PH01004839G0040	-4.98129	PH01000478G0610	-2.17514	PH01002329G0140	-2.94633
Phyllostachys_edulis_newGene_31043	-2.33874	PH01000615G0220	-1.52854	PH01001003G0680	-6.29885
PH01001936G0100	-3.22953	PH01000009G1900	-1.34333	Phyllostachys_edulis_newGene_70897	-3.87505
Phyllostachys_edulis_newGene_61858	-2.57313	Phyllostachys_edulis_newGene_80974	-1.16221	PH01000353G0970	-2.2153
PH01003916G0010	-3.252	PH01002984G0100	-1.32449	PH01000990G0440	-1.15893
PH01003574G0160	-2.32126	Phyllostachys_edulis_newGene_66000	-1.2699	Phyllostachys_edulis_newGene_83606	-2.19779
PH01003071G0200	-4.0062	PH01000536G0010	-4.15693	PH01000057G0990	-2.18466
Phyllostachys_edulis_newGene_44521	-3.83619	PH01000180G0940	-1.24168	Phyllostachys_edulis_newGene_39523	-6.61037
PH01000214G0640	-2.56087	PH01001724G0420	-1.44658	PH01002249G0190	-1.25488
Phyllostachys_edulis_newGene_44898	-2.43669	Phyllostachys_edulis_newGene_2641	-1.0438	Phyllostachys_edulis_newGene_60605	-2.25871
PH01193926G0010	-2.99739	PH01001233G0190	-1.60348	Phyllostachys_edulis_newGene_59439	-2.97907
Phyllostachys_edulis_newGene_58939	-3.60322	PH01001562G0450	-1.06925	PH01000951G0330	-1.78829
PH01000082G0020	-3.92952	PH01000426G0260	-1.84471	PH01001111G0260	-2.11829
PH01000297G0090	-4.86192	Phyllostachys_edulis_newGene_531	-2.16219	PH01001538G0080	-1.60701
PH01002963G0090	-3.00564	Phyllostachys_edulis_newGene_16959	-1.05103	PH01001080G0120	-2.08854
PH01005089G0130	-4.02939	PH01000056G0870	-2.85996	Phyllostachys_edulis_newGene_68808	-1.37984
PH01001648G0180	-6.87216	PH01000593G0720	-1.74067	PH01000003G3690	-2.0499
Phyllostachys_edulis_newGene_62523	-3.11313	PH01002447G0330	-1.41603	Phyllostachys_edulis_newGene_29365	-4.24528
PH01002462G0030	-6.21965	PH01000935G0040	-5.24155	PH01000010G0850	-2.21681
PH01000356G0010	-2.66398	Phyllostachys_edulis_newGene_54411	-1.39998	PH01000126G0460	-3.10913
Phyllostachys_edulis_newGene_48785	-4.66137	PH01001672G0230	-1.59382	Phyllostachys_edulis_newGene_76800	-2.89642
PH01000781G0620	-4.65082	Phyllostachys_edulis_newGene_84759	-1.88634	PH01000305G1060	-1.77039
Phyllostachys_edulis_newGene_83493	-2.84914	PH01002968G0010	-1.23598	Phyllostachys_edulis_newGene_31920	-2.81221
PH01001806G0270	-5.31303	PH01001513G0070	-1.57961	PH01004135G0080	-2.90697
Phyllostachys_edulis_newGene_61327	-6.49567	PH01001280G0150	-1.33845	Phyllostachys_edulis_newGene_29740	-2.18791
Phyllostachys_edulis_newGene_66183	-2.29212	PH01000032G0410	-2.12052	PH01000028G0940	-1.66414
Phyllostachys_edulis_newGene_42063	-2.78759	Phyllostachys_edulis_newGene_66841	-1.02442	PH01000555G0340	-2.16668
PH01000971G0560	-3.33577	PH01000295G0240	-3.2987	Phyllostachys_edulis_newGene_42651	-1.55572
PH01000024G2570	-2.86585	PH01000517G0290	-1.92127	PH01001955G0010	-2.38434
PH01003994G0140	-2.23303	Phyllostachys_edulis_newGene_64671	-4.86826	PH01190548G0010	-1.77729
PH01000811G0680	-2.97078	Phyllostachys_edulis_newGene_64507	-4.12975	Phyllostachys_edulis_newGene_49520	-2.73974
PH01001156G0060	-2.22655	PH01000002G1570	-2.30332	PH01000892G0310	-1.69561
PH01005144G0070	-2.19112	Phyllostachys_edulis_newGene_18008	-2.99003	Phyllostachys_edulis_newGene_46206	-4.42654
Phyllostachys_edulis_newGene_22099	-3.39806	PH01000708G0820	-2.15918	PH01004824G0040	-4.33824
Phyllostachys_edulis_newGene_49483	-2.18328	Phyllostachys_edulis_newGene_62516	-1.78642	PH01003742G0160	-2.49425
PH01001175G0460	-3.81274	PH01002249G0190	-1.29944	PH01000451G0150	-1.00005
PH01000055G1320	-2.82429	PH01000713G0320	-1.08996	PH01000165G0920	-6.35824
PH01001239G0400	-2.36826	PH01003243G0070	-1.41832	PH01001603G0340	-3.86153
PH01006629G0010	-2.63693	PH01000960G0590	-2.36009	PH01001535G0130	-4.16719
PH01003018G0150	-4.88365	PH01001599G0340	-1.468	PH01000906G0040	-1.41352
Phyllostachys_edulis_newGene_38441	-2.22167	PH01001226G0630	-3.63165	Phyllostachys_edulis_newGene_35287	-3.62284
PH01000171G1160	-3.90845	PH01000341G0150	-2.36132	Phyllostachys_edulis_newGene_51646	-3.90689
PH01003834G0160	-3.39287	PH01000378G0990	-1.06374	PH01005304G0120	-2.12556
Phyllostachys_edulis_newGene_45273	-4.29906	PH01001573G0280	-1.42304	PH01001262G0160	-2.38092
PH01001513G0470	-2.48184	PH01001359G0360	-1.07121	PH01000020G2310	-4.57014
PH01245362G0010	-2.78779	PH01000184G1020	-1.60457	Phyllostachys_edulis_newGene_37353	-6.21429
PH01000189G0260	-2.12222	PH01000373G0290	-1.35843	PH01000024G0010	-1.04428
PH01000463G0080	-5.75371	Phyllostachys_edulis_newGene_83214	-1.05576	PH01000211G1040	-1.98794
Phyllostachys_edulis_newGene_59863	-2.90515	Phyllostachys_edulis_newGene_37057	-3.95163	PH01000918G0500	-4.2336
Phyllostachys_edulis_newGene_9106	-4.29163	Phyllostachys_edulis_newGene_32197	-1.10255	PH01001074G0430	-2.61879
PH01000047G0560	-2.29796	Phyllostachys_edulis_newGene_63921	-1.86879	Phyllostachys_edulis_newGene_26070	-4.39999
PH01000890G0540	-5.34743	PH01000029G0470	-3.78285	PH01000346G0830	-1.9426
PH01007935G0020	-2.36164	PH01001629G0390	-3.42286	PH01000169G0460	-3.12255
PH01000174G0810	-3.6011	Phyllostachys_edulis_newGene_43287	-3.53553	PH01001762G0370	-3.72673
Phyllostachys_edulis_newGene_30292	-2.85407	PH01000900G0690	-2.29545	PH01002353G0030	-1.75906
PH01002683G0180	-4.08561	Phyllostachys_edulis_newGene_84250	-1.60003	Phyllostachys_edulis_newGene_58864	-5.28286
PH01002336G0240	-3.26106	Phyllostachys_edulis_newGene_62493	-2.72195	PH01000905G0500	-1.85135
PH01000468G0630	-2.16363	PH01002691G0060	-4.39186	PH01001951G0130	-3.18098
PH01002488G0240	-4.46814	Phyllostachys_edulis_newGene_75679	-1.5545	PH01000395G0480	-2.2976
PH01004439G0140	-3.38972	PH01000152G0730	-2.51705	Phyllostachys_edulis_newGene_78773	-2.81019
PH01003184G0200	-2.17531	PH01004604G0090	-1.214	PH01000478G0160	-5.30536
PH01002445G0270	-2.83994	PH01000951G0330	-1.07072	PH01000024G1490	-1.86168
PH01000181G0680	-2.08955	PH01000378G0150	-2.07923	PH01000957G0060	-3.58099
Phyllostachys_edulis_newGene_66934	-5.19919	Phyllostachys_edulis_newGene_70722	-1.2279	PH01001332G0240	-2.53433
PH01000002G3470	-6.03458	PH01000846G0450	-2.28792	Phyllostachys_edulis_newGene_51276	-3.15898
PH01000093G1740	-2.50173	Phyllostachys_edulis_newGene_80726	-2.66795	PH01000365G0310	-2.30424
PH01000540G0860	-2.26275	PH01001910G0280	-3.13449	PH01001459G0190	-2.72514
Phyllostachys_edulis_newGene_17455	-5.12066	PH01000009G0420	-2.93184	PH01004743G0110	-1.4567
Phyllostachys_edulis_newGene_79516	-2.57954	Phyllostachys_edulis_newGene_50892	-2.17272	PH01000960G0040	-4.6139
PH01000005G1820	-3.04073	Phyllostachys_edulis_newGene_40070	-3.05998	PH01000812G0510	-2.49605
PH01000234G1320	-5.87567	PH01001955G0160	-3.83441	Phyllostachys_edulis_newGene_31009	-3.88801
PH01001477G0270	-2.27677	Phyllostachys_edulis_newGene_80621	-1.73743	Phyllostachys_edulis_newGene_48749	-3.82619
PH01002311G0030	-1.9559	PH01000609G0750	-1.41975	PH01000026G0430	-5.69718
PH01002403G0250	-5.09325	PH01159173G0010	-1.11265	PH01001910G0040	-1.09529
PH01001485G0400	-2.42249	PH01000411G0510	-1.10699	PH01000353G0820	-2.30669
PH01000437G0730	-1.98152	PH01087379G0010	-2.14941	Phyllostachys_edulis_newGene_72610	-1.43008
PH01000883G0550	-1.96675	PH01006106G0020	-1.39052	Phyllostachys_edulis_newGene_30340	-4.26071
PH01004369G0010	-2.17613	PH01000036G0080	-1.10518	PH01001507G0440	-7.48819
Phyllostachys_edulis_newGene_25660	-3.30878	PH01001291G0360	-2.15212	Phyllostachys_edulis_newGene_54228	-2.37841
PH01000397G0450	-2.24007	PH01000355G0780	-1.6213	PH01006106G0050	-7.27192
Phyllostachys_edulis_newGene_61326	-5.86276	PH01004136G0030	-1.78288	PH01004556G0080	-5.58468
Phyllostachys_edulis_newGene_60960	-1.91265	PH01000668G0620	-1.73101	Phyllostachys_edulis_newGene_68937	-4.68061
PH01000915G0450	-2.08154	PH01000036G2310	-2.90653	PH01007571G0010	-2.93805
Phyllostachys_edulis_newGene_72585	-3.22201	PH01000460G0130	-2.3456	PH01001822G0090	-1.73515
PH01000356G0360	-6.4116	Phyllostachys_edulis_newGene_27222	-1.4333	Phyllostachys_edulis_newGene_148	-2.50186
PH01000230G0210	-4.31465	Phyllostachys_edulis_newGene_44446	-1.86823	PH01000629G0460	-1.00122
PH01003023G0290	-2.53464	PH01003202G0120	-1.65055	PH01003258G0190	-4.84651
PH01004763G0040	-2.47591	Phyllostachys_edulis_newGene_38512	-2.47291	Phyllostachys_edulis_newGene_56436	-2.3535
PH01000001G3350	-1.99302	PH01002219G0230	-3.75731	Phyllostachys_edulis_newGene_29417	-2.55557
Phyllostachys_edulis_newGene_70804	-2.21979	Phyllostachys_edulis_newGene_40546	-1.35148	Phyllostachys_edulis_newGene_21407	-6.12572
Phyllostachys_edulis_newGene_68526	-4.54428	Phyllostachys_edulis_newGene_40433	-1.31652	PH01001127G0450	-2.19954
Phyllostachys_edulis_newGene_31434	-2.24922	PH01003789G0080	-1.0355	PH01000135G0900	-1.23256
PH01003790G0160	-2.27531	Phyllostachys_edulis_newGene_79173	-2.98581	PH01000625G0660	-1.66348
Phyllostachys_edulis_newGene_74702	-2.07727	PH01001872G0340	-3.84035	Phyllostachys_edulis_newGene_87804	-5.38975
Phyllostachys_edulis_newGene_51581	-2.53481	PH01000863G0730	-1.37876	Phyllostachys_edulis_newGene_67075	-2.43316
PH01000911G0480	-2.68989	PH01003606G0260	-2.09604	PH01000753G0680	-4.54735
PH01000348G0970	-2.03834	PH01000433G0700	-1.67772	PH01003663G0190	-2.71509
PH01000015G2600	-4.37099	Phyllostachys_edulis_newGene_77325	-2.90963	Phyllostachys_edulis_newGene_32782	-2.32106
Phyllostachys_edulis_newGene_85698	-3.08825	Phyllostachys_edulis_newGene_70354	-1.90294	PH01001599G0340	-3.31096
PH01001370G0510	-4.02455	Phyllostachys_edulis_newGene_63788	-1.22886	PH01002448G0200	-4.10285
Phyllostachys_edulis_newGene_52291	-5.19524	PH01002067G0020	-1.45267	PH01000690G0410	-7.76984
PH01000426G0260	-2.3095	PH01000637G0470	-1.18848	PH01004458G0030	-3.57424
Phyllostachys_edulis_newGene_17018	-1.86404	PH01000413G0480	-2.69894	PH01000291G0940	-2.46171
PH01003858G0090	-2.71673	PH01002139G0190	-3.56777	PH01000374G0830	-2.7979
Phyllostachys_edulis_newGene_53606	-3.81926	PH01005362G0110	-3.24854	PH01001133G0380	-3.26922
PH01006031G0030	-3.92485	Phyllostachys_edulis_newGene_46958	-2.1536	PH01000298G0330	-1.70637
PH01004142G0010	-5.74624	Phyllostachys_edulis_newGene_80107	-2.39741	Phyllostachys_edulis_newGene_43395	-2.52583
PH01000023G0490	-2.80127	PH01009953G0010	-1.10848	PH01000171G0690	-3.63949
Phyllostachys_edulis_newGene_17724	-3.36303	PH01001876G0380	-2.1781	PH01001699G0100	-2.80634
Phyllostachys_edulis_newGene_22560	-1.80559	PH01004347G0010	-1.12018	PH01001222G0080	-2.99019
Phyllostachys_edulis_newGene_31875	-2.29512	PH01001010G0010	-1.62201	PH01003148G0100	-1.79641
PH01002705G0220	-2.17789	PH01000376G0190	-1.43416	PH01002395G0110	-3.37575
PH01001513G0070	-1.84252	Phyllostachys_edulis_newGene_48860	-2.45319	PH01000407G0730	-1.02546
Phyllostachys_edulis_newGene_60927	-2.70577	PH01167417G0010	-3.18215	PH01004829G0010	-4.16325
Phyllostachys_edulis_newGene_72290	-4.69042	Phyllostachys_edulis_newGene_60474	-4.95072	PH01000298G0800	-1.99262
PH01003422G0160	-2.42813	PH01003439G0190	-1.71724	PH01001083G0220	-1.96826
PH01000192G0660	-1.86712	PH01000622G0510	-1.06942	Phyllostachys_edulis_newGene_86781	-1.1281
PH01004637G0120	-7.19927	Phyllostachys_edulis_newGene_33815	-1.64243	PH01003394G0090	-2.95571
PH01001791G0500	-1.94695	PH01000020G1080	-1.1015	PH01000791G0220	-1.16515
Phyllostachys_edulis_newGene_39796	-2.07463	Phyllostachys_edulis_newGene_30144	-1.84494	PH01001142G0050	-3.61462
Phyllostachys_edulis_newGene_87286	-4.41899	Phyllostachys_edulis_newGene_86407	-1.63967	PH01002916G0040	-1.82796
PH01001498G0450	-4.23192	PH01000465G0610	-1.33238	Phyllostachys_edulis_newGene_35457	-1.05256
PH01005962G0060	-4.45039	Phyllostachys_edulis_newGene_48749	-2.42276	PH01000293G0890	-2.7306
PH01000699G0610	-4.47255	Phyllostachys_edulis_newGene_31833	-1.12393	PH01000501G0070	-2.62236
Phyllostachys_edulis_newGene_79294	-4.70983	Phyllostachys_edulis_newGene_1635	-2.18736	PH01001509G0200	-4.03882
PH01000128G1160	-1.7759	PH01000935G0770	-2.3894	PH01000014G2300	-1.35392
PH01000001G2410	-2.99836	PH01001725G0030	-1.39059	PH01002142G0290	-3.36862
PH01002075G0180	-3.09558	PH01000019G0630	-1.08607	PH01001443G0400	-1.39632
PH01000942G0540	-2.67364	Phyllostachys_edulis_newGene_68323	-1.60627	PH01001356G0230	-3.83307
PH01001405G0550	-3.7534	Phyllostachys_edulis_newGene_41576	-1.03091	PH01000160G0960	-1.78522
Phyllostachys_edulis_newGene_54650	-3.07158	PH01000253G1030	-2.00467	Phyllostachys_edulis_newGene_83218	-1.77848
PH01000457G0570	-3.88557	PH01000120G1730	-1.33006	PH01003126G0080	-5.0734
PH01000330G0530	-2.7981	PH01000214G1380	-1.74233	Phyllostachys_edulis_newGene_49341	-1.06211
Phyllostachys_edulis_newGene_22043	-1.79193	PH01001724G0210	-2.73953	PH01000652G0510	-1.64135
PH01000336G0710	-2.50224	PH01002175G0240	-2.15694	PH01003235G0120	-2.11826
PH01000242G0550	-4.23808	PH01000067G0250	-2.78986	PH01003347G0090	-1.49062
PH01001573G0480	-1.94686	PH01002524G0210	-3.01776	PH01000169G0870	-1.05821
PH01000837G0060	-4.29081	PH01001929G0330	-4.51711	Phyllostachys_edulis_newGene_43568	-3.71468
Phyllostachys_edulis_newGene_41632	-2.52352	PH01000536G0060	-2.47857	PH01080423G0010	-3.39819
PH01000615G0340	-2.76807	Phyllostachys_edulis_newGene_28749	-1.89979	Phyllostachys_edulis_newGene_27066	-3.46255
PH01001382G0170	-1.70204	Phyllostachys_edulis_newGene_45534	-1.41221	PH01000385G0220	-4.3163
PH01000068G1130	-5.1801	Phyllostachys_edulis_newGene_62049	-1.40343	PH01002055G0300	-2.36678
Phyllostachys_edulis_newGene_85011	-3.41066	PH01000031G2300	-1.39776	PH01001064G0640	-4.31413
PH01000357G0810	-3.99388	PH01002974G0110	-5.13211	PH01000432G0330	-2.22333
Phyllostachys_edulis_newGene_47129	-1.79167	PH01003073G0070	-1.24809	PH01001584G0170	-3.14262
PH01004130G0160	-1.6611	PH01000003G1660	-1.6557	PH01000544G0520	-3.13589
PH01000572G0370	-2.80978	PH01002075G0180	-3.48817	PH01241143G0010	-2.84824
PH01000812G0410	-1.68179	PH01000479G0310	-3.40198	PH01003590G0060	-2.48636
Phyllostachys_edulis_newGene_17127	-1.97609	PH01000090G0730	-3.26372	PH01000058G1370	-1.00012
PH01000713G0350	-3.47599	PH01000967G0060	-2.81296	Phyllostachys_edulis_newGene_72185	-1.23681
Phyllostachys_edulis_newGene_7903	-3.05301	Phyllostachys_edulis_newGene_42637	-1.71651	PH01000810G0400	-2.78502
PH01000639G0220	-2.25213	PH01000680G0680	-2.31922	PH01000716G0680	-3.09824
PH01000014G1270	-1.91099	PH01000011G0550	-1.02486	PH01004739G0010	-2.03981
Phyllostachys_edulis_newGene_66207	-1.8628	PH01000543G0780	-4.76887	PH01000515G0420	-1.30296
Phyllostachys_edulis_newGene_34953	-3.3855	PH01000432G0330	-1.23467	PH01001761G0090	-5.67236
PH01003439G0190	-2.23619	Phyllostachys_edulis_newGene_56520	-1.12824	Phyllostachys_edulis_newGene_71551	-2.91477
PH01002759G0120	-3.11211	Phyllostachys_edulis_newGene_51998	-1.26735	PH01001109G0130	-2.51187
Phyllostachys_edulis_newGene_42062	-5.18226	PH01000176G0280	-3.12277	PH01000005G1450	-1.14857
Phyllostachys_edulis_newGene_86929	-5.97373	PH01000004G0400	-3.3679	PH01002277G0200	-1.90562
Phyllostachys_edulis_newGene_40272	-3.20284	Phyllostachys_edulis_newGene_36676	-1.90709	PH01007031G0020	-5.30897
Phyllostachys_edulis_newGene_67672	-3.58849	PH01000656G0560	-3.7282	Phyllostachys_edulis_newGene_59724	-3.46451
PH01000054G0580	-3.57989	PH01003385G0010	-1.25216	PH01000758G0100	-3.25695
PH01000781G0220	-6.18384	PH01004791G0030	-1.63456	Phyllostachys_edulis_newGene_30405	-3.38269
Phyllostachys_edulis_newGene_48670	-6.47664	PH01000027G0800	-1.2141	PH01001170G0170	-2.1994
PH01001117G0440	-4.72766	PH01000505G0760	-1.42117	PH01000210G0150	-4.40062
PH01003007G0250	-4.42782	PH01000331G0370	-2.16838	PH01007786G0030	-5.42235
Phyllostachys_edulis_newGene_73078	-2.15435	Phyllostachys_edulis_newGene_86323	-1.19124	PH01000824G0460	-1.50008
PH01001573G0330	-1.63699	PH01000664G0030	-1.24015	PH01004021G0080	-1.07423
PH01001775G0220	-1.98504	PH01001098G0490	-1.11068	PH01195305G0010	-1.29168
Phyllostachys_edulis_newGene_63956	-3.76376	Phyllostachys_edulis_newGene_953	-2.65189	PH01000405G0390	-2.04393
Phyllostachys_edulis_newGene_39349	-1.66628	PH01005399G0010	-1.4493	Phyllostachys_edulis_newGene_33984	-3.58609
PH01000251G0250	-4.5735	Phyllostachys_edulis_newGene_67427	-1.5641	Phyllostachys_edulis_newGene_54319	-4.21787
PH01002316G0030	-1.63781	PH01157007G0010	-1.96592	PH01000606G0390	-3.56136
Phyllostachys_edulis_newGene_22113	-1.82378	PH01000348G0830	-1.26461	PH01001046G0060	-2.20074
PH01003531G0030	-1.76533	PH01000966G0470	-1.053	Phyllostachys_edulis_newGene_88172	-2.85519
PH01005902G0100	-2.48453	PH01000376G0170	-1.58265	PH01004198G0130	-1.6838
PH01000268G0490	-2.5548	PH01000572G0230	-1.48666	PH01005616G0020	-4.14654
PH01001599G0350	-1.81289	Phyllostachys_edulis_newGene_74221	-2.48516	PH01001521G0150	-1.94581
PH01000356G0350	-1.81759	Phyllostachys_edulis_newGene_72290	-1.60222	PH01003941G0030	-4.2046
PH01002055G0060	-2.41128	PH01001536G0150	-2.986	PH01006257G0040	-4.10525
Phyllostachys_edulis_newGene_74982	-2.20648	PH01000790G0070	-2.59415	Phyllostachys_edulis_newGene_76443	-1.041
PH01002310G0030	-3.57361	PH01000383G0390	-1.31508	Phyllostachys_edulis_newGene_64113	-1.28413
Phyllostachys_edulis_newGene_76438	-2.69299	PH01001115G0640	-1.03173	Phyllostachys_edulis_newGene_83035	-3.82125
Phyllostachys_edulis_newGene_52889	-1.5399	PH01003857G0160	-3.4027	Phyllostachys_edulis_newGene_27688	-3.02907
PH01004196G0140	-1.78531	PH01000046G1780	-1.32953	PH01000441G0520	-2.35128
Phyllostachys_edulis_newGene_71063	-2.47641	PH01000666G0820	-2.7277	PH01000749G0530	-2.51335
Phyllostachys_edulis_newGene_53163	-2.3913	Phyllostachys_edulis_newGene_61894	-1.90124	PH01003879G0070	-1.08184
PH01001615G0340	-2.46594	PH01000168G0410	-4.18589	PH01002494G0300	-1.29499
PH01002998G0230	-2.51365	PH01000172G0970	-1.00929	PH01000531G0030	-5.44608
Phyllostachys_edulis_newGene_41053	-1.71691	PH01005522G0100	-2.9305	PH01003093G0130	-3.06804
PH01002701G0030	-4.22775	Phyllostachys_edulis_newGene_79660	-2.1686	PH01001829G0270	-3.1948
PH01001656G0370	-4.69393	Phyllostachys_edulis_newGene_60918	-1.63324	PH01001170G0240	-2.68174
PH01000000G2820	-2.40151	Phyllostachys_edulis_newGene_73628	-1.19384	PH01001308G0580	-1.47556
PH01004791G0030	-6.04053	Phyllostachys_edulis_newGene_52397	-1.64606	PH01002828G0040	-2.67262
PH01000259G1320	-2.67086	Phyllostachys_edulis_newGene_68345	-1.30749	PH01001601G0110	-2.7038
Phyllostachys_edulis_newGene_54379	-4.03996	PH01000356G0640	-3.92188	Phyllostachys_edulis_newGene_47722	-6.59736
PH01005199G0080	-3.60964	Phyllostachys_edulis_newGene_7260	-2.71266	Phyllostachys_edulis_newGene_26681	-2.57736
PH01000096G1860	-3.14053	PH01002041G0150	-1.30209	PH01000299G0540	-2.3096
PH01000466G0380	-3.16413	Phyllostachys_edulis_newGene_47052	-1.1745	Phyllostachys_edulis_newGene_46402	-2.86914
Phyllostachys_edulis_newGene_36143	-3.20105	PH01000082G0850	-1.12343	PH01000001G1300	-1.28284
Phyllostachys_edulis_newGene_41837	-3.67382	PH01002816G0020	-1.53092	PH01004748G0100	-2.35624
PH01001920G0120	-2.61954	PH01000983G0230	-4.24192	PH01000078G0530	-1.21306
PH01001999G0060	-1.92607	PH01000038G1600	-2.02344	PH01001378G0550	-4.05155
Phyllostachys_edulis_newGene_45534	-2.81371	PH01000370G0900	-3.28023	PH01000014G2450	-1.29063
Phyllostachys_edulis_newGene_73539	-3.33185	Phyllostachys_edulis_newGene_49470	-5.61517	PH01000750G0370	-1.85948
Phyllostachys_edulis_newGene_29029	-3.33174	Phyllostachys_edulis_newGene_53803	-3.04607	Phyllostachys_edulis_newGene_79197	-4.47375
Phyllostachys_edulis_newGene_38453	-4.89414	Phyllostachys_edulis_newGene_83810	-1.51593	PH01000495G0210	-1.21201
PH01001001G0360	-1.81391	Phyllostachys_edulis_newGene_43056	-2.2096	Phyllostachys_edulis_newGene_45537	-3.40068
Phyllostachys_edulis_newGene_26571	-2.03592	PH01086705G0010	-5.29593	PH01005362G0110	-3.80521
Phyllostachys_edulis_newGene_20004	-3.4224	Phyllostachys_edulis_newGene_13038	-3.32272	Phyllostachys_edulis_newGene_31084	-1.68624
PH01000057G1550	-5.78849	PH01000045G1410	-1.66035	PH01004776G0080	-1.9296
PH01000097G1350	-4.96218	PH01000810G0400	-1.36719	PH01000243G1050	-2.57335
Phyllostachys_edulis_newGene_56279	-1.4724	Phyllostachys_edulis_newGene_45862	-1.94488	Phyllostachys_edulis_newGene_65991	-3.01161
Phyllostachys_edulis_newGene_82583	-2.19573	PH01000259G1320	-1.95748	PH01002051G0210	-1.80818
Phyllostachys_edulis_newGene_55141	-2.35255	PH01002940G0220	-1.74727	Phyllostachys_edulis_newGene_25550	-2.09214
Phyllostachys_edulis_newGene_48968	-4.43923	PH01005712G0040	-1.67901	Phyllostachys_edulis_newGene_57862	-2.01797
Phyllostachys_edulis_newGene_54890	-1.60289	PH01004135G0070	-1.55938	PH01000292G0160	-3.58089
PH01000589G0240	-4.98393	Phyllostachys_edulis_newGene_81696	-1.01944	PH01002169G0400	-2.17178
PH01000356G0310	-7.41588	PH01001109G0060	-2.32144	PH01001180G0340	-1.81912
PH01000666G0920	-3.47916	PH01000837G0060	-1.2609	PH01000378G0160	-1.56218
PH01000915G0610	-1.50014	PH01004926G0010	-1.96684	PH01000284G0800	-3.40526
PH01000985G0600	-1.81002	PH01004130G0160	-2.05056	Phyllostachys_edulis_newGene_47857	-2.21421
Phyllostachys_edulis_newGene_28228	-5.94952	PH01000025G0290	-1.05235	Phyllostachys_edulis_newGene_48026	-5.83999
Phyllostachys_edulis_newGene_79177	-4.70549	PH01000670G0270	-1.20326	Phyllostachys_edulis_newGene_24569	-1.31832
PH01001325G0420	-4.25219	PH01001255G0210	-1.02202	PH01002361G0300	-1.32682
PH01003871G0080	-1.44445	Phyllostachys_edulis_newGene_38751	-1.29996	PH01000026G1880	-4.64573
Phyllostachys_edulis_newGene_80563	-1.46173	PH01000029G2160	-1.07146	PH01000298G0070	-1.77499
Phyllostachys_edulis_newGene_51177	-3.44036	PH01000743G0130	-2.54733	PH01000758G0220	-2.77516
Phyllostachys_edulis_newGene_57063	-3.52944	PH01000453G0130	-3.27121	PH01000691G0680	-3.38401
PH01001681G0050	-2.33427	Phyllostachys_edulis_newGene_10650	-2.19359	PH01000142G0060	-1.73483
Phyllostachys_edulis_newGene_70336	-1.76271	PH01001543G0400	-1.40399	Phyllostachys_edulis_newGene_88032	-1.40222
PH01002911G0010	-1.56109	Phyllostachys_edulis_newGene_30351	-2.2959	Phyllostachys_edulis_newGene_59912	-2.773
PH01000824G0500	-2.32081	PH01000706G0380	-4.16917	PH01000227G0270	-1.90676
PH01003134G0050	-1.55726	PH01000304G0290	-1.52998	Phyllostachys_edulis_newGene_11326	-3.05572
PH01009463G0010	-4.3618	Phyllostachys_edulis_newGene_29107	-1.24305	PH01000616G0210	-1.09081
PH01000585G0840	-1.43382	PH01008511G0020	-4.55698	PH01000573G0230	-1.16429
PH01165045G0010	-4.0338	PH01007031G0020	-1.54064	Phyllostachys_edulis_newGene_84315	-2.20982
Phyllostachys_edulis_newGene_52780	-4.02259	Phyllostachys_edulis_newGene_56152	-1.39935	PH01001011G0510	-1.01094
Phyllostachys_edulis_newGene_68855	-2.49644	Phyllostachys_edulis_newGene_31622	-1.32335	PH01004595G0120	-2.0737
Phyllostachys_edulis_newGene_39272	-4.92366	Phyllostachys_edulis_newGene_74108	-1.47043	PH01000997G0520	-3.57345
PH01000298G0040	-1.51074	PH01000078G0500	-1.4783	PH01000135G1210	-3.38213
PH01002938G0010	-5.36744	PH01002172G0070	-1.62896	PH01001918G0090	-1.67449
PH01001001G0190	-4.81593	PH01001136G0170	-1.80085	Phyllostachys_edulis_newGene_63353	-2.01243
Phyllostachys_edulis_newGene_51565	-2.66013	Phyllostachys_edulis_newGene_45438	-2.29709	PH01000388G0780	-1.04141
PH01006268G0010	-3.66812	Phyllostachys_edulis_newGene_33291	-1.7168	Phyllostachys_edulis_newGene_64552	-1.66386
Phyllostachys_edulis_newGene_30148	-1.90543	PH01002440G0400	-4.15508	PH01000253G0060	-2.17317
PH01001554G0260	-1.75346	Phyllostachys_edulis_newGene_34138	-3.8854	Phyllostachys_edulis_newGene_46679	-2.16635
Phyllostachys_edulis_newGene_73997	-2.19958	PH01001610G0170	-3.24266	PH01002743G0190	-2.47864
PH01000187G0380	-3.78817	PH01003941G0030	-2.78541	PH01000670G0130	-1.48539
PH01002041G0150	-2.8737	Phyllostachys_edulis_newGene_77388	-2.70449	PH01001196G0170	-1.84493
Phyllostachys_edulis_newGene_80082	-1.93023	PH01000558G0660	-2.8172	PH01000356G0330	-6.3975
Phyllostachys_edulis_newGene_60781	-1.97555	Phyllostachys_edulis_newGene_87288	-3.23108	PH01001641G0030	-5.62711
PH01005129G0100	-4.48817	PH01000904G0010	-2.69221	PH01000339G0550	-3.02167
Phyllostachys_edulis_newGene_76918	-3.05957	PH01000346G0910	-1.91033	PH01000144G0920	-1.49252
PH01001554G0250	-3.79235	PH01000005G1300	-3.16419	PH01000920G0420	-1.94398
PH01002350G0270	-4.84355	PH01000000G0290	-1.04552	PH01000374G0350	-1.67735
PH01000515G0140	-1.42904	PH01000009G2810	-1.10283	PH01000224G0170	-1.58663
PH01004659G0050	-2.40898	PH01050322G0010	-1.38372	PH01001686G0260	-2.4778
Phyllostachys_edulis_newGene_53581	-1.78727	Phyllostachys_edulis_newGene_33853	-1.54097	PH01001280G0570	-4.75535
Phyllostachys_edulis_newGene_44458	-1.37635	PH01002819G0060	-1.62165	PH01001218G0130	-2.0438
PH01000068G0760	-4.32747	Phyllostachys_edulis_newGene_86204	-1.47249	PH01000143G1600	-1.96017
PH01000735G0110	-3.23948	Phyllostachys_edulis_newGene_80564	-1.16359	Phyllostachys_edulis_newGene_39327	-5.65042
PH01001918G0180	-2.91437	PH01000781G0220	-2.70953	PH01006983G0030	-5.79318
PH01004171G0070	-4.32848	Phyllostachys_edulis_newGene_49838	-3.49985	PH01001024G0330	-3.15432
PH01003771G0070	-5.71595	PH01002701G0030	-1.26295	PH01002426G0280	-2.00283
Phyllostachys_edulis_newGene_26699	-1.59394	PH01001557G0390	-1.14346	PH01002212G0070	-2.73336
PH01000099G0620	-1.71134	PH01000277G0970	-2.68168	PH01000087G1520	-2.25548
PH01000021G0190	-4.31904	PH01000018G1850	-4.51149	PH01162652G0010	-4.26631
Phyllostachys_edulis_newGene_71559	-1.82922	Phyllostachys_edulis_newGene_65894	-1.82688	PH01005544G0050	-3.42669
Phyllostachys_edulis_newGene_43599	-4.23256	PH01000163G0150	-1.99771	PH01000014G2340	-1.43288
PH01000410G0480	-5.50026	Phyllostachys_edulis_newGene_17488	-1.77383	PH01003949G0060	-1.25438
PH01002067G0020	-3.55835	PH01000341G0240	-2.87633	Phyllostachys_edulis_newGene_87086	-3.17477
PH01000594G0730	-5.07607	PH01005386G0020	-1.33835	PH01002561G0250	-1.39832
Phyllostachys_edulis_newGene_81779	-3.14629	PH01000531G0740	-1.3772	PH01001226G0630	-1.47618
PH01003328G0010	-2.4141	PH01000407G0270	-3.49802	Phyllostachys_edulis_newGene_52055	-2.70329
PH01002084G0070	-1.38048	PH01265261G0010	-1.05139	PH01000339G0590	-4.37999
Phyllostachys_edulis_newGene_19870	-2.59426	PH01000183G0310	-2.32369	PH01000432G0510	-1.67017
PH01000040G2070	-4.86483	PH01003005G0220	-3.97134	Phyllostachys_edulis_newGene_70527	-6.35383
Phyllostachys_edulis_newGene_39362	-1.57183	PH01003246G0060	-1.47455	PH01005955G0080	-4.87464
PH01000240G0320	-2.73249	Phyllostachys_edulis_newGene_49164	-1.95465	Phyllostachys_edulis_newGene_80269	-3.73105
PH01000289G1200	-2.1989	PH01000012G1020	-1.44061	Phyllostachys_edulis_newGene_40536	-3.14909
PH01000628G0330	-1.35068	PH01002582G0030	-1.79834	PH01000009G0420	-2.02492
Phyllostachys_edulis_newGene_66843	-5.91069	PH01000001G5130	-3.07953	Phyllostachys_edulis_newGene_86300	-4.0714
PH01000665G0590	-3.03542	Phyllostachys_edulis_newGene_44962	-2.59234	PH01001151G0280	-2.21175
PH01000111G0850	-2.41508	PH01003223G0230	-1.51038	PH01000032G2150	-1.40365
PH01000468G0130	-2.57946	PH01002837G0260	-1.38899	Phyllostachys_edulis_newGene_50883	-3.77993
PH01002227G0070	-2.00979	PH01000242G0550	-1.04384	Phyllostachys_edulis_newGene_52740	-2.31511
PH01000004G0870	-3.77448	PH01000360G0050	-4.56094	Phyllostachys_edulis_newGene_58723	-1.36679
Phyllostachys_edulis_newGene_48408	-5.52789	Phyllostachys_edulis_newGene_55074	-2.67749	PH01002132G0200	-1.95478
PH01001275G0430	-4.71147	PH01000915G0610	-1.20359	PH01002162G0290	-2.04041
PH01002623G0180	-2.45889	Phyllostachys_edulis_newGene_64388	-4.21213	Phyllostachys_edulis_newGene_18635	-1.94835
PH01000182G1350	-1.31982	Phyllostachys_edulis_newGene_67145	-2.76297	PH01001251G0410	-2.43369
PH01007750G0010	-1.48001	PH01002041G0120	-2.98122	PH01000370G0370	-3.17382
PH01002997G0140	-4.66367	PH01000365G0310	-1.19202	PH01005566G0040	-1.78425
Phyllostachys_edulis_newGene_71146	-3.80427	Phyllostachys_edulis_newGene_69980	-1.40958	PH01000183G0570	-1.2161
PH01000150G0210	-2.68292	PH01000721G0410	-1.04879	PH01000432G0390	-1.51484
PH01001096G0530	-1.35631	PH01003243G0250	-1.01654	PH01004022G0080	-1.31844
PH01000072G0880	-6.79779	PH01001525G0180	-2.12012	PH01001535G0570	-1.25262
Phyllostachys_edulis_newGene_12895	-1.96418	Phyllostachys_edulis_newGene_31137	-1.54407	PH01004265G0010	-3.78931
PH01001038G0230	-3.21293	PH01004159G0100	-2.49084	PH01002374G0100	-3.07187
PH01000266G1280	-3.11512	PH01005919G0030	-1.34149	Phyllostachys_edulis_newGene_44912	-2.11801
PH01000124G0660	-4.57451	PH01003962G0170	-1.37728	PH01000044G1350	-3.27839
PH01001786G0050	-2.48448	Phyllostachys_edulis_newGene_57862	-1.18063	Phyllostachys_edulis_newGene_19358	-4.26011
Phyllostachys_edulis_newGene_64899	-1.7182	PH01000791G0820	-1.15226	PH01000113G1150	-1.25862
PH01004026G0190	-1.88874	Phyllostachys_edulis_newGene_36249	-1.00616	PH01002278G0240	-4.49932
PH01000679G0550	-1.27707	Phyllostachys_edulis_newGene_84722	-1.1229	PH01000089G0920	-2.50015
PH01000682G0550	-4.14054	PH01000014G0540	-1.50584	PH01001298G0450	-3.12264
PH01000068G1310	-3.10824	PH01000000G0960	-3.09533	PH01003036G0080	-1.50371
PH01006123G0050	-5.10212	PH01002010G0290	-1.07751	Phyllostachys_edulis_newGene_37173	-2.58571
PH01003558G0070	-3.04411	Phyllostachys_edulis_newGene_34084	-2.16146	PH01002584G0110	-4.18972
Phyllostachys_edulis_newGene_47273	-1.36311	PH01000061G0380	-3.53996	PH01000701G0290	-1.71264
PH01006362G0040	-1.29018	PH01000515G0660	-2.16982	Phyllostachys_edulis_newGene_60931	-3.72114
PH01001937G0240	-2.37107	PH01001109G0010	-2.94478	PH01002816G0020	-1.89021
Phyllostachys_edulis_newGene_30846	-1.40607	PH01004356G0100	-1.73565	PH01001281G0400	-1.53708
Phyllostachys_edulis_newGene_25443	-1.77531	PH01000702G0290	-3.97244	PH01000331G0860	-2.139
PH01003071G0110	-3.30145	PH01001406G0410	-1.86333	PH01000993G0340	-3.09157
PH01002653G0320	-1.58444	Phyllostachys_edulis_newGene_85842	-1.37598	PH01000095G0450	-1.91094
Phyllostachys_edulis_newGene_79491	-1.2653	PH01000478G0160	-2.86263	PH01001134G0130	-2.74921
Phyllostachys_edulis_newGene_41252	-2.19161	PH01000690G0430	-1.93256	PH01003665G0130	-1.95241
PH01000035G1760	-3.41394	PH01001060G0550	-1.05822	PH01001818G0410	-3.1108
PH01000068G1380	-2.09972	Phyllostachys_edulis_newGene_17959	-1.50492	PH01000003G3120	-3.57352
PH01000199G0530	-5.39361	Phyllostachys_edulis_newGene_59024	-1.72191	Phyllostachys_edulis_newGene_62289	-1.43875
PH01000051G0480	-6.04544	Phyllostachys_edulis_newGene_68550	-2.98127	PH01000047G0130	-1.51401
PH01000174G0100	-3.36377	PH01029929G0010	-2.24735	Phyllostachys_edulis_newGene_46406	-4.74194
PH01000017G1970	-2.04648	Phyllostachys_edulis_newGene_70034	-1.38651	PH01001444G0400	-2.31226
PH01000114G0030	-5.04984	PH01000379G0990	-1.02091	PH01000788G0260	-1.14413
PH01000172G0050	-3.80896	PH01000005G4070	-1.16592	PH01000164G0020	-3.35361
Phyllostachys_edulis_newGene_36511	-1.91614	PH01002523G0030	-1.03703	Phyllostachys_edulis_newGene_48302	-2.48643
PH01000930G0570	-2.61197	PH01000447G0740	-4.13891	PH01001238G0300	-3.06435
Phyllostachys_edulis_newGene_60194	-4.24803	Phyllostachys_edulis_newGene_43924	-1.00326	PH01000758G0450	-2.68984
PH01004912G0050	-1.25984	PH01000598G0150	-3.54534	Phyllostachys_edulis_newGene_9730	-3.35985
PH01000369G0170	-1.30238	Phyllostachys_edulis_newGene_48680	-1.05904	PH01001364G0450	-3.69083
Phyllostachys_edulis_newGene_33036	-4.18699	PH01000003G3960	-1.73137	PH01006198G0020	-2.4052
PH01000613G0470	-4.27736	PH01005113G0070	-2.80434	PH01000171G0040	-3.96919
Phyllostachys_edulis_newGene_63143	-3.04282	PH01001425G0150	-2.68821	PH01000809G0460	-3.14252
PH01000015G2030	-1.3299	Phyllostachys_edulis_newGene_72292	-1.80392	PH01000094G0860	-1.52574
PH01002175G0240	-4.01444	Phyllostachys_edulis_newGene_79292	-2.81171	PH01078251G0010	-4.8612
PH01000053G1830	-4.4662	Phyllostachys_edulis_newGene_53928	-3.05259	PH01000608G0210	-1.41809
PH01000057G0130	-2.7817	PH01000922G0150	-1.11927	PH01003246G0060	-1.75556
Phyllostachys_edulis_newGene_56934	-1.37842	PH01001726G0230	-1.25533	PH01000533G0940	-1.5315
PH01000060G1710	-4.05258	Phyllostachys_edulis_newGene_7726	-1.191	PH01000302G1000	-1.47826
Phyllostachys_edulis_newGene_78109	-4.63302	PH01000152G0720	-1.95896	Phyllostachys_edulis_newGene_74730	-5.36938
Phyllostachys_edulis_newGene_54840	-2.43551	PH01000374G0350	-2.13949	PH01000019G2170	-1.69325
PH01000371G0350	-1.80161	PH01000873G0130	-1.76673	Phyllostachys_edulis_newGene_43572	-2.56567
PH01000070G0060	-3.9622	PH01001429G0080	-1.12146	Phyllostachys_edulis_newGene_73620	-2.4804
Phyllostachys_edulis_newGene_54995	-1.27647	PH01002229G0070	-1.48239	PH01002684G0240	-1.33001
PH01000179G0600	-1.56739	PH01000310G0670	-1.03421	PH01000201G0100	-1.04026
Phyllostachys_edulis_newGene_5878	-2.67722	PH01000803G0360	-1.31015	PH01000093G1880	-1.50948
PH01002890G0090	-1.77822	PH01002268G0030	-1.06243	PH01000272G0710	-3.11312
Phyllostachys_edulis_newGene_60355	-3.89865	Phyllostachys_edulis_newGene_9450	-2.72072	PH01000942G0480	-2.25345
Phyllostachys_edulis_newGene_59781	-1.28974	PH01000020G2190	-1.15902	PH01001986G0150	-1.34488
Phyllostachys_edulis_newGene_79320	-2.62116	Phyllostachys_edulis_newGene_51882	-1.5556	PH01000962G0650	-4.24724
Phyllostachys_edulis_newGene_53553	-2.17872	PH01000299G0540	-2.6014	PH01000178G0580	-2.86535
PH01001806G0200	-2.74753	PH01004676G0020	-1.82717	PH01000004G3640	-4.18548
PH01000917G0090	-3.68498	PH01000017G1990	-1.34227	Phyllostachys_edulis_newGene_40623	-4.13633
PH01000782G0330	-5.09984	PH01000825G0410	-1.34064	PH01000509G0720	-2.36807
PH01003723G0080	-2.95102	Phyllostachys_edulis_newGene_65379	-1.14555	Phyllostachys_edulis_newGene_45396	-2.40552
PH01001329G0070	-1.58205	Phyllostachys_edulis_newGene_28965	-3.71215	Phyllostachys_edulis_newGene_20057	-2.06418
PH01000749G0820	-3.29499	PH01000040G0370	-1.14322	PH01000438G0060	-3.38292
Phyllostachys_edulis_newGene_61253	-3.33432	PH01001291G0390	-1.10376	PH01005184G0010	-6.13394
Phyllostachys_edulis_newGene_65400	-2.23437	PH01001045G0070	-3.4353	Phyllostachys_edulis_newGene_66727	-6.21223
PH01000025G1210	-3.12265	PH01000174G1300	-2.4757	PH01002028G0330	-1.53921
PH01004034G0090	-3.23465	Phyllostachys_edulis_newGene_81077	-2.26501	PH01001538G0490	-2.32669
PH01002045G0440	-1.86067	PH01000695G0190	-1.21484	PH01000055G2000	-4.80698
PH01001656G0300	-2.46568	PH01000592G0750	-2.7562	PH01000010G0730	-2.36392
Phyllostachys_edulis_newGene_21338	-3.5244	PH01002904G0190	-4.56255	Phyllostachys_edulis_newGene_5592	-3.89207
PH01001852G0460	-2.89553	PH01001005G0570	-1.18455	PH01002036G0090	-2.75297
Phyllostachys_edulis_newGene_75355	-1.31868	Phyllostachys_edulis_newGene_82786	-3.32189	PH01005410G0050	-2.06954
Phyllostachys_edulis_newGene_69948	-3.28489	PH01001109G0400	-1.18414	PH01000536G0010	-2.46507
PH01003319G0220	-3.30091	PH01007983G0020	-3.53413	PH01001459G0370	-3.98067
Phyllostachys_edulis_newGene_87939	-2.27846	PH01000058G1350	-2.37353	PH01000818G0300	-3.68914
Phyllostachys_edulis_newGene_74463	-4.1328	PH01000915G0570	-2.67662	PH01000890G0730	-1.61358
PH01000352G0070	-3.92539	Phyllostachys_edulis_newGene_58008	-1.01979	PH01002743G0200	-1.14701
PH01000346G0910	-1.53355	Phyllostachys_edulis_newGene_83720	-1.3407	Phyllostachys_edulis_newGene_27680	-3.70175
Phyllostachys_edulis_newGene_31513	-5.31014	Phyllostachys_edulis_newGene_80077	-1.803	PH01000562G0840	-1.90406
PH01001183G0280	-1.1746	PH01003107G0020	-2.38939	Phyllostachys_edulis_newGene_59543	-1.6149
PH01003525G0130	-2.40739	PH01002600G0120	-1.03415	Phyllostachys_edulis_newGene_84261	-2.43236
Phyllostachys_edulis_newGene_40471	-4.73934	PH01002304G0090	-1.27097	PH01000998G0220	-2.12652
PH01000012G0960	-3.39862	PH01000026G0870	-1.40013	PH01156335G0010	-1.53392
PH01001592G0400	-3.15674	PH01000570G0730	-2.57559	Phyllostachys_edulis_newGene_61038	-3.08214
PH01000269G0880	-5.65213	Phyllostachys_edulis_newGene_27143	-1.45531	PH01000207G0720	-2.29274
PH01000436G0720	-1.36028	Phyllostachys_edulis_newGene_77754	-3.01926	PH01001159G0070	-1.9265
Phyllostachys_edulis_newGene_27457	-3.12119	Phyllostachys_edulis_newGene_58154	-1.11532	Phyllostachys_edulis_newGene_62963	-1.91028
PH01001725G0310	-3.44959	Phyllostachys_edulis_newGene_49807	-1.09797	PH01002059G0100	-1.50507
PH01005698G0030	-1.33887	PH01000502G0350	-1.36388	PH01006808G0070	-1.32108
Phyllostachys_edulis_newGene_69871	-2.27359	PH01002619G0230	-2.37711	PH01001004G0040	-3.34472
PH01004536G0090	-1.79188	PH01001671G0160	-1.56619	PH01000993G0320	-4.93576
PH01002866G0090	-1.49216	PH01000209G0380	-2.27069	PH01000493G0700	-1.04671
PH01001287G0120	-2.2573	PH01000000G0330	-1.41031	PH01004006G0080	-1.23011
PH01000077G0060	-2.91556	Phyllostachys_edulis_newGene_76742	-2.99313	PH01001146G0220	-3.43755
Phyllostachys_edulis_newGene_49464	-2.56003	PH01000358G0880	-1.05302	PH01001146G0360	-5.44335
Phyllostachys_edulis_newGene_57361	-1.23391	PH01000638G0140	-4.76466	Phyllostachys_edulis_newGene_42395	-1.45611
Phyllostachys_edulis_newGene_45516	-2.75018	PH01000009G1940	-1.12448	PH01001783G0150	-1.88109
Phyllostachys_edulis_newGene_10323	-1.59902	Phyllostachys_edulis_newGene_30560	-2.03093	PH01003974G0030	-2.44339
PH01000450G0080	-3.16462	PH01000219G0690	-1.4199	PH01000155G1560	-2.8198
Phyllostachys_edulis_newGene_44523	-1.25547	Phyllostachys_edulis_newGene_54318	-1.31111	Phyllostachys_edulis_newGene_48756	-2.79918
PH01002983G0240	-4.04361	PH01002098G0130	-3.54509	Phyllostachys_edulis_newGene_26969	-3.35917
PH01000952G0480	-2.39575	Phyllostachys_edulis_newGene_73603	-1.05759	PH01000418G0440	-1.2187
Phyllostachys_edulis_newGene_47436	-1.54832	PH01000003G1440	-2.42378	PH01000040G0830	-1.27734
PH01002725G0180	-2.12585	Phyllostachys_edulis_newGene_63108	-1.63163	PH01000122G0460	-1.61276
PH01003670G0140	-2.34759	PH01000057G0120	-1.97817	Phyllostachys_edulis_newGene_61220	-2.14323
PH01000173G1010	-6.27872	PH01000090G1480	-1.1661	PH01000784G0580	-1.09289
Phyllostachys_edulis_newGene_45832	-5.86623	Phyllostachys_edulis_newGene_68093	-1.25776	Phyllostachys_edulis_newGene_48414	-2.43608
Phyllostachys_edulis_newGene_32367	-4.98726	PH01000290G0480	-1.43396	PH01000002G0720	-2.27382
PH01001760G0350	-1.15884	Phyllostachys_edulis_newGene_56729	-1.89773	Phyllostachys_edulis_newGene_44619	-2.06155
PH01001255G0210	-2.9779	PH01000272G0990	-1.54748	Phyllostachys_edulis_newGene_38855	-1.58518
PH01000401G0170	-1.17474	PH01000120G0730	-1.39331	Phyllostachys_edulis_newGene_62844	-2.70907
Phyllostachys_edulis_newGene_12028	-2.0043	PH01000255G1150	-1.0402	PH01000090G1260	-2.55005
PH01003258G0170	-6.39878	Phyllostachys_edulis_newGene_52142	-1.05649	Phyllostachys_edulis_newGene_46391	-2.37465
Phyllostachys_edulis_newGene_43316	-1.93398	PH01000324G0830	-1.22033	PH01000141G0020	-1.75981
PH01004134G0080	-2.35409	PH01000349G0860	-1.65909	PH01000774G0330	-2.67932
PH01002435G0270	-1.14621	PH01000519G0080	-2.92368	Phyllostachys_edulis_newGene_32176	-3.75752
PH01000953G0380	-2.45127	PH01000623G0320	-1.25963	PH01004135G0070	-3.51572
PH01000369G0580	-3.3081	PH01002434G0010	-5.02521	PH01001866G0440	-1.57519
PH01003332G0010	-2.46484	Phyllostachys_edulis_newGene_61615	-1.79478	PH01000887G0460	-2.27634
PH01005144G0100	-2.30918	PH01000779G0570	-1.14971	PH01000845G0690	-1.52151
Phyllostachys_edulis_newGene_68246	-1.61813	Phyllostachys_edulis_newGene_51012	-1.07882	PH01001536G0090	-3.45381
Phyllostachys_edulis_newGene_26315	-2.43068	PH01002561G0240	-1.08741	Phyllostachys_edulis_newGene_38231	-2.47895
PH01000407G0530	-4.5217	PH01003370G0060	-2.30949	PH01002647G0020	-3.29316
Phyllostachys_edulis_newGene_51964	-2.2159	Phyllostachys_edulis_newGene_54497	-1.15754	PH01002973G0070	-4.14888
PH01003711G0200	-3.86596	PH01000303G0700	-1.96567	PH01000662G0580	-2.11882
PH01001528G0270	-2.0328	Phyllostachys_edulis_newGene_40958	-1.09728	PH01001003G0510	-1.62137
PH01158514G0010	-1.11568	PH01000606G0570	-1.63851	PH01000107G1720	-1.0449
Phyllostachys_edulis_newGene_59062	-3.50446	Phyllostachys_edulis_newGene_67405	-1.39934	Phyllostachys_edulis_newGene_29200	-1.02183
PH01002985G0130	-2.69924	PH01032713G0010	-2.64716	Phyllostachys_edulis_newGene_64059	-1.34582
PH01001473G0280	-2.17138	PH01000257G0480	-2.98382	PH01000159G0540	-1.77203
PH01000311G0160	-2.73327	PH01001536G0220	-1.81248	PH01000484G0010	-2.98695
PH01001495G0400	-2.77594	PH01001312G0420	-1.81096	PH01000056G0750	-2.31113
PH01001787G0070	-3.64919	PH01001490G0300	-1.21168	Phyllostachys_edulis_newGene_77149	-2.59723
PH01000082G1720	-2.89148	PH01000019G0310	-2.19142	PH01000393G0300	-1.68348
PH01000010G2050	-2.7394	Phyllostachys_edulis_newGene_75733	-1.86467	PH01000200G1170	-2.51451
Phyllostachys_edulis_newGene_45855	-1.68009	Phyllostachys_edulis_newGene_26626	-1.02671	PH01000294G0360	-1.36894
PH01000990G0300	-1.47265	Phyllostachys_edulis_newGene_34030	-1.36234	Phyllostachys_edulis_newGene_65277	-4.08848
Phyllostachys_edulis_newGene_62788	-2.33461	Phyllostachys_edulis_newGene_10850	-3.32364	PH01000572G0230	-5.77185
PH01091272G0010	-4.24642	PH01000009G1680	-1.29345	PH01001102G0270	-2.36702
PH01001235G0220	-4.50282	PH01000042G1220	-1.82247	PH01000152G1500	-3.88938
PH01000539G0390	-1.14277	PH01002296G0210	-2.02745	PH01000384G0450	-4.36433
Phyllostachys_edulis_newGene_41765	-6.34153	PH01000075G0960	-2.10759	PH01000365G0270	-3.6544
PH01000260G0330	-3.92274	PH01000804G0170	-1.24244	Phyllostachys_edulis_newGene_78786	-1.39081
PH01000260G0020	-6.03678	PH01002657G0270	-1.29569	Phyllostachys_edulis_newGene_44444	-2.69099
Phyllostachys_edulis_newGene_36020	-1.63672	PH01000637G0080	-1.27197	PH01000664G0700	-2.75236
PH01000950G0220	-5.56126	PH01000077G0510	-1.97399	PH01001575G0290	-3.45269
PH01001410G0050	-3.02716	PH01000093G1880	-1.04146	PH01000000G1500	-2.64409
Phyllostachys_edulis_newGene_83441	-5.39741	Phyllostachys_edulis_newGene_39272	-1.1655	PH01002598G0120	-1.6406
Phyllostachys_edulis_newGene_3995	-1.08559	Phyllostachys_edulis_newGene_62492	-1.41935	PH01000258G0150	-1.53248
PH01002251G0030	-3.17525	PH01000074G0030	-1.64673	Phyllostachys_edulis_newGene_51939	-2.37025
Phyllostachys_edulis_newGene_26872	-1.42403	Phyllostachys_edulis_newGene_55587	-2.7403	PH01004379G0050	-1.5269
PH01006188G0020	-1.13958	PH01001090G0480	-1.13145	PH01003431G0070	-1.89894
Phyllostachys_edulis_newGene_43293	-1.07535	PH01001453G0450	-1.17204	PH01000227G0920	-2.43303
PH01000171G1030	-2.78479	PH01000000G4410	-1.12747	PH01001325G0570	-1.3647
Phyllostachys_edulis_newGene_9381	-1.24381	PH01003771G0070	-5.925	PH01000936G0390	-4.44101
Phyllostachys_edulis_newGene_46955	-1.10344	PH01006153G0020	-2.71119	PH01001549G0080	-2.98548
PH01001303G0370	-2.13865	Phyllostachys_edulis_newGene_64070	-2.82452	PH01000143G0730	-4.42673
PH01003446G0180	-2.9676	PH01000367G0710	-1.53069	PH01000933G0030	-2.88297
PH01000936G0270	-2.20298	Phyllostachys_edulis_newGene_70219	-2.74041	PH01000235G0700	-1.37764
PH01044240G0010	-1.55117	PH01000216G0820	-2.11505	PH01002397G0060	-2.2599
Phyllostachys_edulis_newGene_73989	-1.66882	Phyllostachys_edulis_newGene_9468	-1.19197	PH01001661G0430	-1.75293
Phyllostachys_edulis_newGene_73260	-4.1807	Phyllostachys_edulis_newGene_70256	-2.14592	PH01002792G0200	-3.35292
PH01001536G0030	-6.43794	PH01001579G0330	-2.21284	PH01000112G0370	-2.10565
PH01001038G0450	-6.17473	PH01000439G0310	-1.7202	Phyllostachys_edulis_newGene_59107	-5.16951
Phyllostachys_edulis_newGene_71413	-3.08236	PH01002992G0200	-1.14098	PH01000118G0230	-1.42385
PH01000100G1590	-2.40446	PH01004147G0070	-1.27073	PH01001920G0160	-1.47655
PH01003555G0050	-1.7958	PH01001328G0340	-3.63542	PH01000390G0810	-3.28283
PH01000170G1070	-1.82776	Phyllostachys_edulis_newGene_83921	-1.66616	PH01001559G0180	-1.59206
Phyllostachys_edulis_newGene_8104	-3.77474	Phyllostachys_edulis_newGene_61286	-1.48054	PH01001341G0330	-2.14117
PH01000543G0780	-5.9737	Phyllostachys_edulis_newGene_38148	-1.49839	Phyllostachys_edulis_newGene_60918	-1.38123
PH01000004G1860	-2.19166	PH01000359G0640	-3.08903	PH01000366G0250	-1.21582
PH01000658G0070	-1.55073	Phyllostachys_edulis_newGene_7582	-1.10556	PH01001136G0490	-1.38699
Phyllostachys_edulis_newGene_19409	-1.05176	PH01000005G3460	-2.52954	PH01001032G0280	-1.55313
PH01000828G0220	-2.09653	PH01000068G0140	-1.22511	PH01000486G0360	-1.1804
PH01000670G0190	-2.22604	PH01001829G0120	-4.01931	PH01004590G0050	-2.82256
PH01002052G0040	-1.04561	PH01000160G0990	-1.06343	PH01000474G0270	-1.63594
PH01000436G0430	-4.13883	Phyllostachys_edulis_newGene_26439	-2.93592	PH01000776G0230	-1.41049
PH01000695G0190	-3.88856	PH01000125G1100	-1.76876	PH01000235G0770	-1.9535
Phyllostachys_edulis_newGene_13190	-1.20601	PH01006228G0030	-3.22338	Phyllostachys_edulis_newGene_55012	-1.48001
Phyllostachys_edulis_newGene_36626	-1.81761	Phyllostachys_edulis_newGene_38981	-1.00112	PH01003062G0140	-3.71751
Phyllostachys_edulis_newGene_50097	-4.52661	PH01000569G0440	-2.18404	PH01000075G1830	-2.01113
Phyllostachys_edulis_newGene_54935	-3.00604	Phyllostachys_edulis_newGene_70645	-1.04164	PH01002024G0310	-1.86131
PH01000731G0290	-3.19485	Phyllostachys_edulis_newGene_65076	-1.23258	Phyllostachys_edulis_newGene_53339	-2.07884
Phyllostachys_edulis_newGene_53989	-1.06398	Phyllostachys_edulis_newGene_67144	-1.98462	PH01000303G0970	-3.83723
Phyllostachys_edulis_newGene_87638	-3.80577	PH01069730G0010	-1.93396	PH01001286G0190	-1.34023
Phyllostachys_edulis_newGene_68877	-5.71131	Phyllostachys_edulis_newGene_68109	-1.53759	PH01000997G0470	-2.13282
PH01001006G0320	-2.01292	PH01000363G0450	-2.23833	PH01002033G0270	-4.54113
PH01003333G0130	-3.24449	PH01000128G0650	-1.76426	PH01000845G0230	-1.66657
Phyllostachys_edulis_newGene_41297	-2.90361	PH01000737G0140	-1.68364	Phyllostachys_edulis_newGene_78086	-1.57998
PH01000426G0350	-2.59967	Phyllostachys_edulis_newGene_24738	-2.07875	PH01000122G1760	-1.08928
PH01004437G0120	-2.43856	Phyllostachys_edulis_newGene_32534	-1.08497	PH01003602G0130	-2.40769
PH01000842G0280	-2.23813	PH01002176G0250	-2.27689	Phyllostachys_edulis_newGene_41047	-1.97121
PH01004966G0010	-5.15163	PH01005184G0010	-4.86524	Phyllostachys_edulis_newGene_65602	-1.68145
Phyllostachys_edulis_newGene_50412	-2.4936	Phyllostachys_edulis_newGene_16276	-1.12646	PH01000435G0990	-2.0427
PH01000440G0540	-1.64376	PH01000193G0070	-1.39546	PH01000742G0250	-1.42654
Phyllostachys_edulis_newGene_39065	-1.45207	PH01002584G0110	-2.69711	PH01002383G0120	-1.95353
PH01002304G0260	-2.38498	PH01001672G0140	-1.28998	Phyllostachys_edulis_newGene_70534	-1.61662
Phyllostachys_edulis_newGene_71966	-1.09407	Phyllostachys_edulis_newGene_75617	-1.03387	PH01000049G0480	-1.56684
PH01002240G0140	-1.16401	PH01000480G0800	-1.79793	PH01002167G0230	-2.1312
PH01000231G0250	-2.2186	PH01001692G0240	-3.42763	PH01209874G0010	-2.34909
PH01000297G0870	-2.96936	Phyllostachys_edulis_newGene_21073	-2.14194	PH01003844G0140	-1.35213
PH01001648G0190	-2.97235	PH01000491G0330	-1.6331	PH01000317G0520	-3.31496
PH01003184G0220	-4.12006	PH01000069G1880	-1.6913	Phyllostachys_edulis_newGene_47730	-4.34561
PH01000910G0650	-4.3047	PH01000824G0460	-2.26873	Phyllostachys_edulis_newGene_41453	-3.55919
Phyllostachys_edulis_newGene_8924	-3.80468	PH01000647G0200	-2.7935	PH01002650G0290	-2.78534
PH01000077G1380	-3.46686	PH01000294G1010	-1.03595	PH01000258G0510	-2.14502
PH01002148G0300	-1.09997	PH01001124G0320	-2.33815	PH01001705G0340	-1.8534
PH01004069G0060	-1.26384	PH01117651G0010	-1.15731	PH01000011G1330	-2.18272
PH01001191G0400	-2.63963	PH01002677G0090	-1.22705	PH01002012G0310	-5.28713
PH01174643G0010	-4.30104	PH01000835G0730	-1.82277	PH01000327G1100	-1.82415
Phyllostachys_edulis_newGene_87015	-1.15969	Phyllostachys_edulis_newGene_68203	-1.26325	Phyllostachys_edulis_newGene_75675	-3.7518
PH01277935G0010	-2.17966	PH01000020G1010	-4.22598	PH01000332G0530	-2.46451
Phyllostachys_edulis_newGene_68510	-1.78039	Phyllostachys_edulis_newGene_74237	-1.41784	PH01000482G0210	-1.90532
Phyllostachys_edulis_newGene_67899	-3.92758	Phyllostachys_edulis_newGene_43262	-3.33532	Phyllostachys_edulis_newGene_63003	-3.67635
PH01000122G1350	-2.28869	Phyllostachys_edulis_newGene_86871	-1.8297	PH01001626G0100	-2.62579
Phyllostachys_edulis_newGene_78500	-1.00827	Phyllostachys_edulis_newGene_51173	-1.08128	PH01001446G0440	-2.18563
Phyllostachys_edulis_newGene_82657	-2.86831	Phyllostachys_edulis_newGene_51883	-2.72147	Phyllostachys_edulis_newGene_85696	-2.15272
PH01000894G0770	-1.00139	PH01000135G1480	-3.19752	PH01002618G0050	-1.57497
Phyllostachys_edulis_newGene_71792	-2.8539	Phyllostachys_edulis_newGene_33748	-1.6005	Phyllostachys_edulis_newGene_26017	-3.82409
Phyllostachys_edulis_newGene_38169	-3.9129	PH01000214G0180	-2.10295	PH01001609G0220	-1.46082
Phyllostachys_edulis_newGene_57907	-2.27782	PH01000192G0370	-1.10299	PH01002336G0170	-2.3866
PH01002160G0120	-1.10275	PH01000401G0730	-1.15206	PH01002861G0060	-2.46789
PH01000750G0200	-1.81572	PH01000299G0440	-2.11333	PH01000538G0650	-2.42233
PH01002705G0180	-4.04232	Phyllostachys_edulis_newGene_23463	-2.31784	PH01002944G0220	-1.67348
Phyllostachys_edulis_newGene_7220	-1.78794	PH01000978G0280	-2.30614	PH01000625G0150	-2.21316
PH01000271G0610	-2.86026	PH01000634G0180	-1.66827	PH01000054G1720	-3.03294
Phyllostachys_edulis_newGene_28146	-2.72454	Phyllostachys_edulis_newGene_44943	-1.75347	PH01000033G0270	-1.69424
PH01001371G0360	-3.80288	PH01003490G0030	-1.4148	PH01000537G0600	-1.96088
PH01000373G0860	-4.20523	PH01000629G0580	-1.68374	PH01000047G1520	-2.85472
PH01000816G0010	-1.69771	PH01000041G1200	-6.60453	PH01003082G0030	-1.94631
Phyllostachys_edulis_newGene_1656	-2.49141	PH01000820G0560	-1.14261	PH01000537G0750	-1.02075
PH01001141G0100	-5.66642	PH01001651G0230	-1.3119	PH01000900G0690	-2.13674
Phyllostachys_edulis_newGene_56962	-1.59265	Phyllostachys_edulis_newGene_37288	-1.38727	Phyllostachys_edulis_newGene_59764	-1.41073
PH01001716G0170	-1.33726	PH01000733G0110	-2.5371	PH01000069G1880	-4.65349
PH01000007G1520	-1.14448	Phyllostachys_edulis_newGene_48394	-1.17307	PH01000397G0930	-1.27844
PH01001725G0030	-1.93738	PH01000720G0390	-1.51288	PH01002677G0090	-2.63511
PH01000116G0780	-1.02824	PH01000259G0680	-1.01253	PH01003555G0050	-1.83627
PH01000045G1410	-1.3973	PH01000291G1220	-1.983	PH01000000G7300	-3.62845
PH01002317G0150	-4.15766	PH01002121G0290	-2.04335	PH01000029G0660	-2.54532
PH01000004G1580	-4.33714	Phyllostachys_edulis_newGene_17855	-2.77845	PH01000626G0620	-2.20783
Phyllostachys_edulis_newGene_57936	-6.05275	Phyllostachys_edulis_newGene_55723	-1.49959	Phyllostachys_edulis_newGene_58240	-2.56712
PH01000224G0300	-2.19452	Phyllostachys_edulis_newGene_459	-1.49817	PH01008362G0020	-3.73773
Phyllostachys_edulis_newGene_79930	-4.43038	Phyllostachys_edulis_newGene_80808	-3.92989	PH01000070G0050	-4.05802
PH01000165G1550	-3.80748	Phyllostachys_edulis_newGene_69274	-1.55813	Phyllostachys_edulis_newGene_48406	-2.81413
Phyllostachys_edulis_newGene_77855	-1.78193	PH01000234G1040	-1.45466	Phyllostachys_edulis_newGene_84418	-2.08976
PH01000116G0770	-4.29367	Phyllostachys_edulis_newGene_83907	-1.32635	PH01006726G0020	-3.06606
PH01000300G0080	-1.87023	PH01000009G2190	-1.6863	PH01000450G0290	-2.73554
Phyllostachys_edulis_newGene_42776	-1.77932	PH01003666G0150	-1.06767	PH01001673G0250	-1.03749
PH01000908G0560	-2.47776	PH01000165G0980	-1.27865	PH01000041G1830	-1.39477
Phyllostachys_edulis_newGene_69661	-3.67855	PH01000633G0020	-1.77675	PH01004739G0030	-1.65103
Phyllostachys_edulis_newGene_615	-1.10261	PH01001976G0240	-3.05683	PH01000009G2190	-2.53436
Phyllostachys_edulis_newGene_65571	-3.36731	PH01000058G1400	-1.20467	Phyllostachys_edulis_newGene_30889	-2.57443
PH01000973G0500	-4.7527	PH01000039G0450	-1.88501	PH01000049G0320	-1.41389
Phyllostachys_edulis_newGene_15023	-1.21364	PH01000054G1230	-2.50226	PH01001423G0290	-2.47528
PH01000700G0550	-2.75507	PH01082021G0010	-2.17884	Phyllostachys_edulis_newGene_67504	-3.3779
PH01001747G0400	-3.15743	PH01000049G1380	-1.76282	PH01000733G0330	-3.00827
Phyllostachys_edulis_newGene_65072	-2.03347	Phyllostachys_edulis_newGene_63978	-1.76069	Phyllostachys_edulis_newGene_20095	-1.55933
PH01045329G0010	-3.14738	PH01000284G0690	-1.37222	Phyllostachys_edulis_newGene_77889	-2.27458
PH01001129G0380	-2.75082	PH01000700G0550	-1.21289	Phyllostachys_edulis_newGene_53294	-2.15585
PH01004121G0170	-2.03053	PH01001326G0300	-1.4693	PH01003433G0150	-2.66298
Phyllostachys_edulis_newGene_36234	-1.11607	Phyllostachys_edulis_newGene_7862	-1.76765	PH01003670G0040	-1.44173
Phyllostachys_edulis_newGene_64227	-2.75926	Phyllostachys_edulis_newGene_60124	-1.22325	PH01001774G0060	-3.39258
Phyllostachys_edulis_newGene_47514	-1.28394	PH01000147G1500	-1.14654	Phyllostachys_edulis_newGene_2840	-2.9671
PH01001938G0370	-1.22151	PH01000690G0310	-1.36953	PH01000623G0880	-2.60781
PH01000103G1050	-1.94375	PH01001096G0260	-1.35569	PH01000572G0380	-2.61647
PH01001213G0370	-4.22331	Phyllostachys_edulis_newGene_37670	-1.47043	Phyllostachys_edulis_newGene_54217	-3.92196
PH01001745G0160	-1.01447	PH01225068G0010	-4.73924	PH01000297G0670	-6.16179
PH01001516G0020	-2.64815	Phyllostachys_edulis_newGene_69981	-1.30055	PH01000240G0080	-3.48526
Phyllostachys_edulis_newGene_61894	-1.70527	Phyllostachys_edulis_newGene_78786	-1.67856	PH01001761G0380	-3.52022
PH01000158G0020	-4.61224	PH01000272G0400	-4.63562	Phyllostachys_edulis_newGene_39530	-2.72456
PH01000237G1180	-3.14594	Phyllostachys_edulis_newGene_41152	-1.3758	PH01000366G0010	-3.61192
Phyllostachys_edulis_newGene_66156	-3.35011	PH01000020G0980	-4.19453	PH01000513G0710	-2.57643
PH01000087G1250	-3.97504	PH01001672G0300	-2.83639	PH01002571G0210	-2.0302
PH01000530G0600	-3.76784	PH01001020G0160	-1.52673	PH01000588G0300	-4.00141
PH01005572G0060	-3.83784	PH01000226G0830	-2.38248	PH01000110G0290	-2.64849
PH01000611G0410	-3.22001	PH01000531G0180	-1.44154	PH01000773G0420	-1.88702
Phyllostachys_edulis_newGene_87003	-2.46593	Phyllostachys_edulis_newGene_48678	-2.5038	PH01001453G0070	-2.20378
Phyllostachys_edulis_newGene_54336	-2.04261	PH01000181G1390	-1.02653	PH01000531G0200	-1.38998
PH01000759G0270	-2.38155	PH01001628G0230	-1.69884	PH01001527G0160	-1.37297
Phyllostachys_edulis_newGene_32411	-3.28197	PH01000060G1060	-1.02031	PH01000000G2220	-1.02328
PH01003372G0050	-3.86496	PH01000269G0470	-1.40711	PH01004678G0050	-1.29916
PH01002465G0120	-1.68011	Phyllostachys_edulis_newGene_26729	-1.27063	Phyllostachys_edulis_newGene_30632	-2.98416
Phyllostachys_edulis_newGene_64028	-1.05556	PH01001717G0210	-1.56587	PH01001161G0170	-1.05338
PH01009953G0010	-1.54487	Phyllostachys_edulis_newGene_41029	-2.18113	Phyllostachys_edulis_newGene_67633	-1.75484
PH01000092G0350	-3.08737	PH01000974G0460	-1.75582	PH01000968G0110	-1.66358
PH01002550G0260	-4.75985	PH01001498G0450	-1.23328	PH01001626G0270	-1.31249
PH01001766G0150	-2.82557	PH01002776G0100	-1.53317	Phyllostachys_edulis_newGene_44289	-1.4
PH01000050G0890	-2.58236	PH01003060G0220	-2.49109	Phyllostachys_edulis_newGene_62863	-4.80442
Phyllostachys_edulis_newGene_29320	-1.28202	PH01001278G0450	-3.29167	PH01000628G0480	-2.14721
PH01002147G0030	-1.26063	Phyllostachys_edulis_newGene_52039	-2.28988	PH01002373G0140	-2.06578
Phyllostachys_edulis_newGene_60858	-1.38455	Phyllostachys_edulis_newGene_41642	-1.6871	Phyllostachys_edulis_newGene_61084	-2.87328
Phyllostachys_edulis_newGene_79404	-1.81213	PH01002042G0020	-1.03694	Phyllostachys_edulis_newGene_51983	-1.47812
PH01000053G1650	-1.958	PH01000770G0270	-1.6761	PH01002699G0040	-2.58249
PH01004741G0050	-4.40231	PH01002104G0290	-1.36411	PH01000044G0420	-1.18418
Phyllostachys_edulis_newGene_29507	-2.88414	Phyllostachys_edulis_newGene_55945	-1.53582	Phyllostachys_edulis_newGene_47409	-3.46194
Phyllostachys_edulis_newGene_20051	-2.62569	PH01001902G0020	-2.65176	PH01000685G0710	-1.32151
Phyllostachys_edulis_newGene_49387	-1.77037	Phyllostachys_edulis_newGene_32625	-1.49228	Phyllostachys_edulis_newGene_60257	-1.60021
PH01002260G0200	-1.21295	Phyllostachys_edulis_newGene_10875	-1.41678	Phyllostachys_edulis_newGene_70117	-3.15717
PH01000332G0310	-1.56804	PH01001117G0580	-1.10299	PH01000053G2370	-3.2785
Phyllostachys_edulis_newGene_10550	-4.22842	PH01001786G0130	-1.3216	PH01001020G0160	-1.58993
PH01001071G0480	-4.98934	PH01000309G0960	-1.10101	PH01000646G0070	-1.17328
PH01000019G0580	-1.63307	PH01000089G1640	-1.37941	PH01000523G0480	-2.43725
PH01000068G0230	-3.19445	PH01001143G0250	-2.85134	PH01000417G1120	-1.42578
Phyllostachys_edulis_newGene_34936	-4.12224	PH01000704G0300	-1.73315	PH01000511G0790	-3.04665
PH01000514G0680	-1.16792	Phyllostachys_edulis_newGene_51818	-1.22259	Phyllostachys_edulis_newGene_42833	-1.46588
PH01001173G0260	-2.33913	Phyllostachys_edulis_newGene_50051	-1.73836	PH01000573G0160	-1.12326
PH01000314G0230	-4.2283	Phyllostachys_edulis_newGene_56026	-2.86704	PH01000216G0150	-3.26309
Phyllostachys_edulis_newGene_45142	-1.29223	Phyllostachys_edulis_newGene_73725	-1.65866	PH01007181G0050	-4.17769
PH01001308G0410	-4.35403	PH01000708G0250	-1.23373	PH01188189G0010	-2.81131
Phyllostachys_edulis_newGene_70219	-2.22249	PH01002756G0180	-1.72871	Phyllostachys_edulis_newGene_27689	-1.78471
PH01000025G0600	-1.66562	PH01001168G0090	-1.75484	PH01000000G1020	-1.91894
PH01000117G0470	-2.31645	PH01000090G1640	-1.39558	Phyllostachys_edulis_newGene_72766	-3.76756
PH01003218G0110	-2.00822	PH01002246G0200	-1.66992	PH01000297G0660	-2.99423
PH01002764G0170	-3.91324	Phyllostachys_edulis_newGene_36459	-2.48592	PH01003110G0170	-2.4813
PH01002343G0290	-2.98577	Phyllostachys_edulis_newGene_64309	-1.28826	PH01000060G0730	-1.65341
Phyllostachys_edulis_newGene_29628	-5.14002	PH01000627G0240	-1.32097	PH01000214G1110	-1.06047
PH01002076G0230	-2.11687	PH01003382G0180	-1.4024	PH01004652G0010	-2.05695
Phyllostachys_edulis_newGene_32092	-2.23453	PH01003071G0110	-1.27993	PH01000134G0780	-2.21159
Phyllostachys_edulis_newGene_30282	-2.79401	PH01003525G0130	-1.57817	PH01001037G0310	-3.6238
PH01002710G0290	-3.16949	PH01000496G0570	-1.13482	PH01004686G0010	-2.26768
Phyllostachys_edulis_newGene_68608	-2.11436	Phyllostachys_edulis_newGene_60639	-1.19023	PH01000081G1010	-1.61352
Phyllostachys_edulis_newGene_11087	-4.80708	PH01000348G0270	-1.42089	PH01003212G0030	-2.71551
Phyllostachys_edulis_newGene_32007	-3.30172	Phyllostachys_edulis_newGene_73238	-1.12998	Phyllostachys_edulis_newGene_32001	-2.84482
Phyllostachys_edulis_newGene_23175	-4.36359	PH01000962G0650	-1.5141	PH01000180G0930	-1.3665
PH01000075G0480	-3.70914	PH01000197G1290	-2.14943	Phyllostachys_edulis_newGene_37878	-2.68333
PH01000167G0760	-1.3656	Phyllostachys_edulis_newGene_519	-3.92847	PH01000379G0980	-1.70461
PH01003910G0060	-4.07505	PH01003181G0020	-1.36166	PH01000239G0570	-1.23954
PH01001932G0350	-2.34964	PH01001898G0230	-1.50229	PH01000308G0060	-1.34284
Phyllostachys_edulis_newGene_7135	-3.28908	PH01000331G1170	-1.41997	PH01001109G0380	-4.32184
PH01000914G0260	-1.73337	PH01002823G0320	-1.50008	PH01000872G0310	-1.65658
PH01003357G0120	-3.80458	PH01000299G0840	-2.68011	PH01000144G1430	-3.71309
PH01000429G0550	-1.89894	Phyllostachys_edulis_newGene_38917	-1.307	PH01001347G0030	-2.33122
PH01002914G0110	-1.81702	Phyllostachys_edulis_newGene_28922	-1.23574	PH01001504G0170	-2.82965
Phyllostachys_edulis_newGene_5797	-1.42075	PH01000234G1320	-1.31229	PH01001264G0280	-2.2066
Phyllostachys_edulis_newGene_78345	-3.52923	PH01002346G0350	-1.01756	PH01000561G0400	-3.05732
PH01243276G0010	-4.69311	PH01003432G0030	-1.03898	Phyllostachys_edulis_newGene_34304	-2.8371
Phyllostachys_edulis_newGene_51958	-3.31372	Phyllostachys_edulis_newGene_53043	-4.146	PH01000375G0300	-1.77318
Phyllostachys_edulis_newGene_50384	-1.04639	PH01000527G0530	-1.09012	PH01000591G0810	-1.19483
PH01000637G0050	-3.50643	PH01000231G0250	-1.09573	PH01001563G0370	-1.90531
PH01000019G0750	-2.15077	PH01000901G0230	-1.18595	PH01001136G0480	-4.38235
PH01002514G0210	-2.37987	PH01001295G0450	-1.98089	PH01001184G0410	-1.62215
Phyllostachys_edulis_newGene_35778	-2.37702	PH01000841G0690	-1.16688	PH01000569G0190	-1.63582
PH01003060G0240	-3.1068	Phyllostachys_edulis_newGene_84704	-1.54878	PH01000048G0850	-1.4152
PH01001863G0260	-1.45624	PH01000378G0230	-3.57066	PH01000019G1410	-1.80752
Phyllostachys_edulis_newGene_24980	-2.31374	PH01001044G0430	-2.13628	PH01000359G0830	-1.12663
PH01000206G1300	-2.5687	Phyllostachys_edulis_newGene_4273	-1.96076	Phyllostachys_edulis_newGene_69625	-1.17599
PH01176376G0010	-5.71349	PH01004248G0080	-2.31641	Phyllostachys_edulis_newGene_78192	-2.68328
PH01000628G0310	-2.58781	PH01001117G0440	-4.08313	PH01000706G0410	-2.72367
Phyllostachys_edulis_newGene_34070	-3.33138	PH01001477G0090	-1.86059	PH01148329G0010	-1.21947
PH01000110G0250	-2.142	PH01000809G0120	-2.21207	PH01000000G7010	-2.51846
PH01000150G1230	-2.7228	PH01000014G2500	-2.26071	PH01000219G0260	-2.08363
PH01002560G0290	-1.19458	PH01002931G0070	-1.86148	PH01000020G1340	-1.34653
PH01009045G0010	-5.03548	PH01002440G0180	-1.63155	PH01001498G0180	-2.16164
Phyllostachys_edulis_newGene_48394	-2.27974	Phyllostachys_edulis_newGene_83441	-4.15462	PH01002088G0100	-1.56065
PH01001950G0330	-3.17962	PH01002623G0170	-1.48127	PH01000346G0570	-2.59532
Phyllostachys_edulis_newGene_54325	-3.55277	PH01000625G0180	-2.34743	PH01000077G0950	-2.92815
PH01000417G0360	-2.04572	PH01001228G0360	-1.10819	PH01001053G0160	-2.45774
Phyllostachys_edulis_newGene_32293	-2.7862	PH01000734G0060	-1.07761	PH01000516G0330	-2.39962
PH01001118G0290	-1.12836	Phyllostachys_edulis_newGene_56462	-1.40484	PH01000370G0270	-3.43654
Phyllostachys_edulis_newGene_17611	-1.92656	PH01001910G0160	-2.488	Phyllostachys_edulis_newGene_37423	-2.76108
Phyllostachys_edulis_newGene_80698	-3.2475	PH01002980G0200	-1.02487	PH01000004G2200	-3.11971
PH01000906G0010	-1.0344	Phyllostachys_edulis_newGene_71157	-1.83473	PH01000775G0830	-3.38482
Phyllostachys_edulis_newGene_29930	-4.71067	PH01002707G0030	-1.22262	PH01000328G0460	-1.15485
Phyllostachys_edulis_newGene_34878	-2.88669	Phyllostachys_edulis_newGene_77968	-1.96369	Phyllostachys_edulis_newGene_45399	-2.56108
Phyllostachys_edulis_newGene_51924	-1.21406	PH01002231G0280	-2.36333	PH01000094G1140	-3.26882
PH01000036G2060	-2.24825	PH01003859G0110	-1.05741	Phyllostachys_edulis_newGene_54617	-1.88939
PH01003240G0100	-5.97638	Phyllostachys_edulis_newGene_71217	-2.60319	Phyllostachys_edulis_newGene_29074	-3.24186
PH01002003G0250	-1.27262	Phyllostachys_edulis_newGene_14088	-4.50657	PH01000050G0800	-2.72077
PH01001353G0020	-1.70134	PH01000042G2200	-1.31553	Phyllostachys_edulis_newGene_81966	-4.1694
Phyllostachys_edulis_newGene_30560	-3.97449	PH01001590G0100	-2.10722	PH01000060G0530	-1.21985
PH01000142G0230	-6.41962	PH01000832G0680	-1.47205	Phyllostachys_edulis_newGene_86968	-2.1122
PH01000272G0400	-3.43216	Phyllostachys_edulis_newGene_38308	-1.09589	PH01000062G1290	-3.59784
PH01001001G0170	-3.30784	Phyllostachys_edulis_newGene_77059	-1.87942	PH01000035G0350	-1.39503
PH01005451G0060	-1.52554	Phyllostachys_edulis_newGene_8536	-2.66687	PH01000113G0280	-2.64873
Phyllostachys_edulis_newGene_85471	-2.57416	PH01000983G0020	-2.08067	PH01001299G0500	-1.16698
PH01002213G0380	-5.59018	PH01002934G0210	-1.1317	PH01000667G0100	-2.253
PH01000720G0530	-1.20036	PH01000063G0270	-1.39761	PH01000299G0550	-3.05407
Phyllostachys_edulis_newGene_67032	-1.94373	Phyllostachys_edulis_newGene_19304	-1.5212	PH01000045G1600	-3.72685
PH01000325G0560	-1.97106	PH01001190G0330	-1.8573	Phyllostachys_edulis_newGene_80762	-2.94568
Phyllostachys_edulis_newGene_23797	-1.67178	PH01001226G0550	-2.08952	Phyllostachys_edulis_newGene_33150	-2.17397
PH01000290G0480	-4.04843	Phyllostachys_edulis_newGene_799	-2.0636	PH01000625G0360	-1.51707
PH01002304G0090	-4.40481	Phyllostachys_edulis_newGene_43352	-1.8096	PH01000061G0590	-3.02363
PH01003340G0250	-2.1253	PH01002330G0330	-3.55399	PH01000127G0420	-3.96496
PH01001491G0170	-4.84342	PH01000827G0180	-1.11587	Phyllostachys_edulis_newGene_1607	-1.43253
PH01000319G0220	-1.00962	Phyllostachys_edulis_newGene_34442	-1.12871	PH01001060G0550	-1.7403
Phyllostachys_edulis_newGene_13371	-3.02817	PH01004966G0010	-1.17856	Phyllostachys_edulis_newGene_26061	-3.27898
PH01000355G0340	-4.27893	PH01001870G0020	-2.09096	PH01001495G0120	-1.27247
PH01003526G0090	-3.28604	PH01000687G0920	-2.31004	PH01000559G0180	-2.24495
PH01000023G1520	-3.72239	PH01002495G0070	-2.10894	PH01002017G0090	-1.64708
Phyllostachys_edulis_newGene_82936	-1.13659	PH01000473G1010	-1.96684	Phyllostachys_edulis_newGene_57462	-1.72564
Phyllostachys_edulis_newGene_7726	-2.95841	PH01004133G0080	-2.37016	PH01000032G1340	-3.60048
Phyllostachys_edulis_newGene_50156	-1.18063	Phyllostachys_edulis_newGene_50830	-1.99349	Phyllostachys_edulis_newGene_68722	-1.52738
PH01003805G0010	-1.04409	Phyllostachys_edulis_newGene_79784	-1.10186	PH01000080G0200	-1.33619
Phyllostachys_edulis_newGene_41950	-1.22007	Phyllostachys_edulis_newGene_38304	-1.27618	PH01000162G1260	-1.57843
Phyllostachys_edulis_newGene_80595	-4.13406	PH01000390G0410	-2.25287	PH01004432G0110	-1.17512
Phyllostachys_edulis_newGene_51965	-2.23406	Phyllostachys_edulis_newGene_37446	-1.17346	PH01000464G0670	-2.29554
PH01000809G0120	-1.598	PH01000620G0480	-1.47412	PH01000394G0510	-3.98584
PH01000701G0030	-1.39171	Phyllostachys_edulis_newGene_56748	-2.28954	PH01000162G0280	-1.73982
PH01002528G0300	-1.46329	Phyllostachys_edulis_newGene_19700	-1.01879	Phyllostachys_edulis_newGene_69929	-2.42032
Phyllostachys_edulis_newGene_58194	-3.96709	PH01000355G0810	-1.34048	PH01002279G0200	-2.10771
PH01000127G0800	-3.39072	PH01001051G0480	-2.24232	PH01001707G0480	-1.19776
PH01000144G0970	-2.48375	PH01000118G0030	-1.59922	PH01004830G0160	-3.50646
PH01000327G0270	-1.34417	PH01256985G0010	-1.83919	PH01000430G0870	-2.93824
PH01000042G0280	-1.39884	PH01003440G0030	-2.04127	PH01000003G0060	-1.47371
PH01000341G0240	-2.66397	PH01000727G0620	-1.50615	PH01000048G1310	-1.58174
PH01002098G0280	-2.85038	Phyllostachys_edulis_newGene_27351	-1.21016	PH01000001G2580	-1.73723
PH01000706G0760	-1.29863	Phyllostachys_edulis_newGene_87015	-1.84933	Phyllostachys_edulis_newGene_27072	-3.51283
PH01000001G5360	-3.44487	PH01000073G1210	-3.75827	PH01000353G0680	-2.21585
Phyllostachys_edulis_newGene_30589	-2.17406	PH01001870G0430	-1.21707	PH01003118G0100	-2.49735
Phyllostachys_edulis_newGene_52579	-3.38229	Phyllostachys_edulis_newGene_65812	-2.07098	PH01001609G0410	-1.06075
PH01000044G0760	-1.83138	PH01000003G1680	-1.45201	PH01000079G1850	-2.73476
Phyllostachys_edulis_newGene_37499	-3.99202	PH01000439G0320	-3.21222	PH01000955G0570	-2.07369
PH01000023G1620	-3.95845	Phyllostachys_edulis_newGene_83207	-1.6424	PH01159374G0010	-1.48756
Phyllostachys_edulis_newGene_70694	-2.61117	PH01000690G0610	-1.27798	PH01005439G0040	-1.44398
PH01000265G0410	-2.88373	PH01000352G0320	-3.11555	PH01000095G1440	-2.71283
PH01183435G0010	-4.51211	PH01000216G0150	-2.23075	PH01000742G0700	-1.26313
PH01000715G0200	-3.37459	PH01000701G0030	-1.27263	PH01003847G0090	-1.72186
PH01002529G0110	-2.1188	PH01176376G0010	-1.40171	PH01001516G0180	-1.0474
PH01000732G0570	-5.44576	Phyllostachys_edulis_newGene_77062	-1.70522	Phyllostachys_edulis_newGene_41498	-3.79977
Phyllostachys_edulis_newGene_48548	-2.54877	Phyllostachys_edulis_newGene_87527	-1.77794	PH01000123G1110	-1.70696
Phyllostachys_edulis_newGene_37937	-2.08497	Phyllostachys_edulis_newGene_26649	-2.15429	Phyllostachys_edulis_newGene_18932	-2.01422
PH01000017G1990	-9.06208	PH01002763G0260	-1.00167	PH01001217G0300	-2.31266
PH01000215G0540	-1.60763	Phyllostachys_edulis_newGene_63932	-1.36462	Phyllostachys_edulis_newGene_26532	-2.32713
PH01001262G0380	-1.67631	Phyllostachys_edulis_newGene_55581	-1.98163	PH01002295G0170	-1.01154
PH01004378G0040	-1.29786	Phyllostachys_edulis_newGene_30246	-1.07579	PH01002584G0160	-1.10178
PH01002634G0180	-3.00495	Phyllostachys_edulis_newGene_43321	-2.54516	PH01001918G0380	-3.98658
PH01000122G0720	-2.8387	Phyllostachys_edulis_newGene_60579	-1.37541	Phyllostachys_edulis_newGene_63452	-3.01218
PH01000364G1140	-3.89792	PH01000012G0190	-2.29451	PH01003162G0120	-2.52831
Phyllostachys_edulis_newGene_32068	-2.20366	Phyllostachys_edulis_newGene_69023	-1.41333	PH01000653G0760	-2.53911
PH01001406G0410	-4.13349	Phyllostachys_edulis_newGene_75844	-1.68742	PH01002010G0020	-1.21034
PH01000811G0600	-1.68973	PH01000008G1310	-1.0853	PH01002235G0150	-1.85499
PH01000960G0480	-3.79752	PH01000791G0370	-1.52516	Phyllostachys_edulis_newGene_26649	-4.03408
PH01000598G0150	-3.29416	Phyllostachys_edulis_newGene_74949	-2.23725	PH01000868G0480	-4.30339
PH01000974G0510	-1.94462	Phyllostachys_edulis_newGene_54293	-3.63245	Phyllostachys_edulis_newGene_53801	-3.74615
Phyllostachys_edulis_newGene_79505	-1.54661	Phyllostachys_edulis_newGene_74775	-1.35909	PH01000462G0040	-1.98496
PH01003063G0040	-2.9372	PH01001747G0400	-1.70606	PH01000028G2610	-3.15802
Phyllostachys_edulis_newGene_25937	-3.4007	PH01001393G0210	-1.71045	Phyllostachys_edulis_newGene_53229	-2.4401
PH01001577G0180	-1.58253	PH01000113G0550	-1.5971	Phyllostachys_edulis_newGene_81538	-1.63572
PH01000029G2390	-2.93168	Phyllostachys_edulis_newGene_42527	-1.2283	Phyllostachys_edulis_newGene_41489	-2.77322
PH01003808G0010	-5.30871	PH01000162G0420	-1.25473	PH01001491G0460	-1.08822
Phyllostachys_edulis_newGene_36768	-5.16109	Phyllostachys_edulis_newGene_44049	-2.24512	PH01000282G1230	-2.40771
PH01001064G0640	-2.62609	PH01000856G0030	-2.82715	PH01002495G0170	-2.07558
PH01001545G0250	-4.04181	PH01001976G0420	-1.03752	PH01001429G0120	-2.33109
PH01005698G0070	-3.7241	PH01000546G0560	-1.9538	PH01003644G0160	-2.99029
Phyllostachys_edulis_newGene_59513	-1.01833	PH01001717G0310	-1.17796	PH01000900G0600	-1.26304
PH01000431G0620	-5.38163	PH01000467G0560	-2.84759	PH01002999G0080	-2.73641
Phyllostachys_edulis_newGene_29166	-4.25795	PH01006860G0040	-1.86158	Phyllostachys_edulis_newGene_69577	-4.31146
PH01000020G1330	-1.50525	PH01001328G0510	-1.24637	Phyllostachys_edulis_newGene_38306	-2.29157
PH01000766G0340	-2.89245	PH01000028G1350	-3.41265	PH01000584G0810	-2.67736
Phyllostachys_edulis_newGene_39126	-5.77425	PH01000341G0180	-1.54965	PH01002727G0070	-1.83102
PH01000516G0700	-1.16637	PH01000602G0260	-1.23768	PH01000000G3700	-1.10637
PH01000049G1510	-2.27993	PH01001674G0100	-1.52591	Phyllostachys_edulis_newGene_40558	-2.03645
PH01000504G0590	-3.02681	PH01004177G0020	-1.02374	Phyllostachys_edulis_newGene_14143	-3.31423
PH01002546G0230	-1.04604	PH01000573G0640	-1.16348	PH01000050G1510	-3.03143
Phyllostachys_edulis_newGene_84800	-2.29367	PH01000040G0020	-1.94084	PH01000618G1010	-2.15557
Phyllostachys_edulis_newGene_6476	-2.81219	PH01000208G0510	-2.85849	Phyllostachys_edulis_newGene_74969	-1.03576
Phyllostachys_edulis_newGene_65278	-1.3477	Phyllostachys_edulis_newGene_52960	-1.20111	PH01000391G0160	-6.50683
PH01003395G0080	-2.84397	PH01000248G0080	-1.47792	PH01003439G0130	-1.41933
PH01000983G0230	-5.02734	PH01000284G0220	-1.67347	PH01000668G0390	-2.31592
PH01000543G0910	-3.21112	Phyllostachys_edulis_newGene_27141	-2.20401	Phyllostachys_edulis_newGene_48112	-2.03877
PH01001063G0490	-3.45385	PH01005184G0030	-3.16778	PH01000924G0630	-3.01298
PH01000001G2310	-1.30162	PH01000180G1240	-3.80227	PH01001498G0120	-1.10041
Phyllostachys_edulis_newGene_39948	-1.6609	PH01001261G0170	-1.28968	PH01000073G1210	-2.00738
PH01001034G0440	-1.56385	Phyllostachys_edulis_newGene_31681	-1.01689	PH01004106G0180	-3.58429
PH01000076G1530	-2.73164	PH01000431G0930	-1.79385	PH01000679G0200	-2.53017
PH01241143G0010	-1.47134	PH01003023G0090	-1.77547	PH01002002G0170	-1.8491
PH01001836G0010	-7.51679	PH01000405G0390	-1.41257	PH01004290G0140	-1.3821
PH01002131G0320	-1.65912	Phyllostachys_edulis_newGene_19633	-2.48699	Phyllostachys_edulis_newGene_23304	-4.65203
PH01002046G0230	-5.7504	PH01000370G1010	-1.31873	PH01004107G0040	-2.23885
PH01001658G0220	-1.15689	PH01001720G0330	-1.61505	PH01000743G0080	-1.37898
Phyllostachys_edulis_newGene_51528	-3.11445	Phyllostachys_edulis_newGene_32214	-1.3467	Phyllostachys_edulis_newGene_38709	-4.6178
PH01000505G0640	-1.30536	Phyllostachys_edulis_newGene_71617	-1.68834	PH01002899G0090	-1.88566
Phyllostachys_edulis_newGene_24975	-1.57884	PH01000595G0470	-2.19749	PH01005154G0100	-1.8132
Phyllostachys_edulis_newGene_30366	-3.90863	PH01001791G0490	-1.26351	Phyllostachys_edulis_newGene_29648	-2.69848
PH01005541G0030	-3.23129	Phyllostachys_edulis_newGene_42198	-1.75715	PH01039675G0010	-3.15466
PH01005436G0030	-3.15567	Phyllostachys_edulis_newGene_69134	-1.29403	PH01002102G0100	-2.05458
PH01001742G0260	-2.96513	Phyllostachys_edulis_newGene_64561	-1.258	Phyllostachys_edulis_newGene_18826	-2.48352
Phyllostachys_edulis_newGene_74953	-9.20762	PH01004006G0080	-1.97784	PH01003377G0040	-1.76019
Phyllostachys_edulis_newGene_41579	-3.30274	Phyllostachys_edulis_newGene_59848	-2.22307	PH01000032G2110	-2.68201
PH01005384G0040	-1.84458	Phyllostachys_edulis_newGene_49830	-1.57015	PH01001922G0010	-2.10096
Phyllostachys_edulis_newGene_20996	-2.85521	PH01001698G0250	-1.04242	Phyllostachys_edulis_newGene_36576	-6.12964
PH01000185G0570	-3.08558	PH01002276G0160	-2.33726	PH01000160G0390	-3.709
PH01001372G0150	-1.58046	PH01000113G1200	-1.4811	PH01000281G0740	-1.8402
Phyllostachys_edulis_newGene_17467	-1.06645	PH01000774G0100	-1.46551	PH01002041G0120	-1.49388
PH01003393G0080	-4.85598	PH01000094G1680	-2.37963	PH01002221G0280	-2.84205
PH01000370G0900	-2.00624	Phyllostachys_edulis_newGene_65277	-1.0697	PH01001115G0490	-1.39901
Phyllostachys_edulis_newGene_73967	-3.28375	PH01004500G0150	-1.26832	Phyllostachys_edulis_newGene_35767	-3.42668
PH01001179G0110	-2.78611	PH01000718G0720	-1.07269	Phyllostachys_edulis_newGene_48859	-1.97037
PH01002403G0320	-2.05653	PH01001790G0040	-2.51497	PH01000026G2310	-1.04764
PH01001784G0130	-1.66561	PH01000004G3640	-2.43126	Phyllostachys_edulis_newGene_27065	-3.64423
PH01004640G0010	-4.54533	Phyllostachys_edulis_newGene_28931	-1.58578	Phyllostachys_edulis_newGene_52089	-5.39628
PH01000164G1190	-1.70801	PH01000093G1740	-1.51914	PH01000284G0980	-3.76921
PH01004448G0090	-4.26588	PH01172955G0010	-1.35346	PH01000011G1470	-1.75171
Phyllostachys_edulis_newGene_85797	-2.24591	Phyllostachys_edulis_newGene_49737	-1.10825	PH01000238G0560	-1.54477
PH01000107G1710	-3.938	PH01000925G0590	-2.08988	Phyllostachys_edulis_newGene_36960	-2.81325
PH01000264G0040	-3.55422	Phyllostachys_edulis_newGene_46689	-1.68059	Phyllostachys_edulis_newGene_40362	-2.8422
PH01000126G0610	-3.87554	PH01000026G0430	-1.35664	Phyllostachys_edulis_newGene_55626	-3.72388
PH01004435G0030	-3.27209	Phyllostachys_edulis_newGene_38610	-1.05152	PH01000558G0660	-1.13199
PH01001139G0310	-2.43154	PH01000968G0230	-1.16715	PH01005143G0030	-2.86967
PH01162702G0010	-4.10028	PH01000656G0670	-1.67734	Phyllostachys_edulis_newGene_45377	-2.07561
Phyllostachys_edulis_newGene_65553	-4.21739	PH01004930G0010	-1.9969	PH01000423G0650	-1.44267
Phyllostachys_edulis_newGene_38007	-3.55961	Phyllostachys_edulis_newGene_18559	-1.79303	PH01000680G0150	-2.30468
Phyllostachys_edulis_newGene_74399	-2.95524	Phyllostachys_edulis_newGene_27959	-1.50067	PH01001599G0170	-3.13295
PH01001603G0500	-5.5527	PH01002829G0130	-1.07629	PH01000376G0220	-4.54699
Phyllostachys_edulis_newGene_86567	-1.7848	PH01000319G0230	-1.34553	PH01000012G2610	-1.12247
PH01002042G0020	-1.855	PH01000720G0650	-1.20316	PH01000356G0660	-3.38274
PH01001045G0070	-3.06926	PH01003072G0160	-1.79385	PH01000101G0150	-2.0063
PH01001683G0080	-2.03218	Phyllostachys_edulis_newGene_36638	-2.15158	PH01001262G0230	-1.16062
Phyllostachys_edulis_newGene_53110	-3.06624	Phyllostachys_edulis_newGene_8245	-2.48077	PH01000828G0490	-1.16779
PH01001170G0190	-2.17409	PH01000532G0920	-2.33168	PH01002755G0130	-2.76008
PH01000059G0130	-3.76464	PH01000742G0730	-2.6141	Phyllostachys_edulis_newGene_67417	-1.65917
Phyllostachys_edulis_newGene_54317	-2.04035	PH01000952G0480	-2.32717	Phyllostachys_edulis_newGene_36108	-3.36923
PH01001387G0240	-3.64245	PH01002124G0100	-1.1829	PH01000946G0330	-1.87867
Phyllostachys_edulis_newGene_55830	-3.63186	Phyllostachys_edulis_newGene_53243	-1.60907	Phyllostachys_edulis_newGene_81504	-3.06992
PH01001153G0580	-1.01182	PH01000012G1040	-1.06299	PH01001135G0080	-3.85043
PH01000267G0190	-2.28342	PH01001109G0290	-1.47372	PH01002406G0090	-2.53751
PH01000365G0710	-1.58055	Phyllostachys_edulis_newGene_82183	-1.28202	PH01000479G0310	-4.29136
PH01000062G0310	-3.72808	PH01000244G0450	-2.96408	PH01000906G0150	-2.23833
Phyllostachys_edulis_newGene_36282	-5.42143	PH01002515G0230	-2.23038	PH01000985G0240	-2.01532
Phyllostachys_edulis_newGene_34056	-1.69165	PH01001360G0070	-1.57558	PH01000340G0370	-2.75792
PH01000617G0820	-1.01513	PH01002642G0160	-1.2813	Phyllostachys_edulis_newGene_25478	-1.16243
Phyllostachys_edulis_newGene_44507	-1.43203	Phyllostachys_edulis_newGene_44130	-2.25427	PH01000395G0200	-2.97109
Phyllostachys_edulis_newGene_47372	-3.68123	Phyllostachys_edulis_newGene_72667	-1.43153	PH01001030G0370	-1.33551
PH01086705G0010	-5.18537	Phyllostachys_edulis_newGene_58970	-1.66388	PH01001103G0370	-1.12655
PH01000090G1040	-1.95242	PH01008466G0020	-1.95268	Phyllostachys_edulis_newGene_54447	-2.8933
PH01000041G0830	-2.46199	PH01000384G0540	-2.07523	PH01000343G0220	-1.52375
PH01000015G0080	-3.79501	PH01004473G0060	-1.25901	PH01000123G1100	-2.97438
Phyllostachys_edulis_newGene_57433	-4.4148	Phyllostachys_edulis_newGene_39141	-1.98037	Phyllostachys_edulis_newGene_33378	-1.10191
PH01000106G0360	-1.03728	Phyllostachys_edulis_newGene_70283	-1.12359	Phyllostachys_edulis_newGene_24591	-1.50395
Phyllostachys_edulis_newGene_79844	-2.59037	PH01151705G0010	-2.62365	PH01004428G0130	-2.91671
PH01000816G0520	-2.24538	Phyllostachys_edulis_newGene_69773	-2.11735	PH01001023G0120	-1.99648
Phyllostachys_edulis_newGene_79402	-2.9837	Phyllostachys_edulis_newGene_34332	-1.06267	PH01000733G0570	-2.53277
PH01001868G0090	-1.82894	PH01001528G0240	-3.72927	PH01001483G0050	-2.90237
PH01005428G0030	-1.26556	PH01000021G0190	-1.51906	Phyllostachys_edulis_newGene_55944	-3.06529
PH01000083G1160	-2.20751	PH01005035G0010	-1.01809	PH01001453G0010	-2.08114
PH01002603G0080	-2.89473	Phyllostachys_edulis_newGene_83083	-1.82172	PH01000326G0160	-2.56615
Phyllostachys_edulis_newGene_51233	-3.11151	PH01002550G0210	-1.63011	PH01001907G0110	-2.67281
PH01001988G0250	-3.95146	PH01000748G0450	-2.00239	PH01001479G0370	-3.3755
PH01002965G0180	-2.5641	PH01009069G0010	-1.53721	PH01000047G0470	-1.5873
PH01002271G0140	-1.9747	PH01000781G0130	-1.10899	PH01001590G0300	-1.40176
Phyllostachys_edulis_newGene_81827	-1.76048	PH01003377G0130	-2.01101	PH01000048G0790	-1.6656
Phyllostachys_edulis_newGene_69532	-1.22249	PH01001809G0330	-2.08772	Phyllostachys_edulis_newGene_71217	-4.49427
PH01000106G1250	-1.72541	PH01000013G1620	-1.53954	Phyllostachys_edulis_newGene_32576	-2.48309
Phyllostachys_edulis_newGene_78857	-1.85271	Phyllostachys_edulis_newGene_56935	-2.07467	Phyllostachys_edulis_newGene_78329	-2.31772
PH01000818G0250	-2.16751	PH01000622G0470	-1.32225	PH01000331G0190	-2.96008
PH01001295G0520	-1.35219	Phyllostachys_edulis_newGene_1666	-1.03346	PH01002976G0020	-4.78583
Phyllostachys_edulis_newGene_60409	-2.69563	PH01000978G0590	-1.64609	PH01002367G0110	-1.59039
PH01001536G0150	-2.47603	PH01000511G0920	-1.76018	PH01001125G0090	-1.80559
Phyllostachys_edulis_newGene_26254	-2.00028	PH01000928G0560	-1.22128	PH01000402G0910	-1.77447
Phyllostachys_edulis_newGene_56017	-2.50809	Phyllostachys_edulis_newGene_58289	-1.54738	PH01000458G0390	-3.67788
Phyllostachys_edulis_newGene_86185	-1.11588	Phyllostachys_edulis_newGene_52336	-2.02262	PH01000193G0210	-1.54587
PH01000003G0790	-2.83615	PH01005472G0050	-1.23637	PH01000767G0720	-1.21598
PH01000536G0060	-3.42682	Phyllostachys_edulis_newGene_78426	-1.20138	PH01003107G0020	-3.77841
PH01002919G0180	-2.67821	PH01000483G0460	-1.85875	PH01000038G0780	-1.83583
PH01000031G2510	-1.32757	Phyllostachys_edulis_newGene_65571	-2.56709	Phyllostachys_edulis_newGene_72764	-3.80996
PH01000563G0660	-3.39005	PH01000950G0220	-2.56512	PH01003462G0030	-1.41779
PH01003914G0010	-2.33904	Phyllostachys_edulis_newGene_29722	-2.04009	Phyllostachys_edulis_newGene_82485	-4.00541
PH01003421G0090	-4.10153	PH01000833G0540	-1.28482	Phyllostachys_edulis_newGene_55957	-5.17627
Phyllostachys_edulis_newGene_19650	-1.3209	PH01004749G0070	-1.32387	Phyllostachys_edulis_newGene_12838	-1.55755
PH01002050G0140	-4.51199	PH01000218G1420	-1.01877	PH01001018G0340	-2.18423
PH01002160G0010	-3.97237	PH01005282G0020	-1.04078	Phyllostachys_edulis_newGene_53268	-2.41573
PH01000442G0510	-3.65112	PH01000621G0610	-1.00795	PH01004875G0100	-1.76168
PH01005081G0030	-2.78514	PH01000199G0530	-1.7531	PH01000036G2090	-1.77539
PH01006112G0020	-2.58594	Phyllostachys_edulis_newGene_74915	-3.32892	PH01004473G0060	-4.50539
Phyllostachys_edulis_newGene_49957	-1.94911	PH01000383G0300	-1.83817	Phyllostachys_edulis_newGene_69195	-1.55472
PH01002719G0240	-4.65537	PH01001034G0230	-1.31259	PH01003669G0040	-1.86164
PH01002447G0310	-3.9404	PH01001431G0220	-1.03789	Phyllostachys_edulis_newGene_76121	-4.86925
Phyllostachys_edulis_newGene_65147	-1.02433	PH01000323G0630	-1.41758	PH01000851G0310	-2.97072
Phyllostachys_edulis_newGene_84847	-5.15367	Phyllostachys_edulis_newGene_44917	-1.85644	PH01000770G0470	-4.76953
PH01001131G0560	-1.86169	PH01000338G0060	-1.20688	PH01002188G0370	-1.67696
PH01164808G0010	-4.45977	PH01004329G0080	-1.56407	Phyllostachys_edulis_newGene_43874	-3.79538
PH01117651G0010	-1.29185	PH01000649G0580	-1.66988	PH01002747G0140	-3.73295
PH01000258G0100	-3.32167	PH01002214G0260	-1.19812	PH01000896G0310	-1.79204
PH01000353G0570	-2.00232	PH01005225G0070	-3.03872	PH01005116G0050	-1.32491
PH01000093G0840	-2.35951	PH01000018G2450	-1.84928	Phyllostachys_edulis_newGene_38610	-2.58357
PH01000050G1200	-1.17661	PH01000236G1020	-1.37473	PH01000024G2430	-1.076
PH01000824G0640	-4.66736	PH01001714G0260	-4.13805	PH01000014G2500	-1.24134
Phyllostachys_edulis_newGene_70692	-2.57123	Phyllostachys_edulis_newGene_62475	-1.28769	PH01000397G0880	-3.65876
Phyllostachys_edulis_newGene_79880	-1.01169	PH01000237G1250	-2.89944	PH01000606G0020	-1.41708
PH01000440G0290	-2.70725	Phyllostachys_edulis_newGene_48189	-1.20603	Phyllostachys_edulis_newGene_41678	-2.73404
Phyllostachys_edulis_newGene_64047	-1.88915	PH01000630G0120	-1.22718	Phyllostachys_edulis_newGene_52486	-2.15018
PH01000001G2030	-3.609	PH01000409G0550	-1.40914	Phyllostachys_edulis_newGene_70256	-2.70496
PH01000020G0500	-2.27293	Phyllostachys_edulis_newGene_35663	-1.149	PH01000064G0940	-1.19408
Phyllostachys_edulis_newGene_68295	-4.66797	PH01004634G0020	-1.09928	PH01000954G0450	-1.91701
PH01000537G0770	-5.02007	PH01001417G0480	-1.3629	PH01001738G0150	-1.04148
PH01000207G0500	-4.9063	PH01000509G0270	-1.8694	PH01001926G0380	-2.18999
PH01004749G0070	-9.24049	PH01001963G0300	-2.2308	PH01001306G0130	-2.29914
Phyllostachys_edulis_newGene_68792	-1.60724	PH01001539G0060	-1.19451	PH01000332G0410	-2.76361
Phyllostachys_edulis_newGene_32399	-2.75488	PH01001057G0520	-2.19754	PH01004068G0100	-3.68724
PH01002950G0300	-1.19537	PH01002002G0170	-3.76479	PH01003026G0060	-1.66928
PH01200434G0010	-2.40921	PH01000906G0020	-1.95647	PH01000654G0100	-2.87437
PH01001826G0250	-2.24769	PH01000886G0020	-1.45777	PH01002192G0250	-3.33012
PH01000816G0480	-1.15327	Phyllostachys_edulis_newGene_33120	-1.12196	PH01002035G0210	-1.2248
Phyllostachys_edulis_newGene_77629	-2.59305	Phyllostachys_edulis_newGene_69886	-1.30112	PH01000759G0700	-1.14146
PH01002866G0160	-1.43311	PH01000358G0410	-1.80022	PH01000254G0440	-2.57811
Phyllostachys_edulis_newGene_40357	-1.5979	PH01000605G0360	-1.01989	PH01000011G1900	-1.31165
Phyllostachys_edulis_newGene_18621	-1.49032	PH01000548G0550	-1.53952	PH01000019G2380	-2.76417
PH01000781G0130	-2.91898	Phyllostachys_edulis_newGene_70527	-1.384	PH01000511G0680	-1.60893
Phyllostachys_edulis_newGene_51605	-1.07956	PH01003393G0080	-2.26413	Phyllostachys_edulis_newGene_56186	-1.64313
PH01001222G0160	-1.87801	PH01000716G0370	-1.09176	Phyllostachys_edulis_newGene_65449	-2.88979
Phyllostachys_edulis_newGene_31148	-7.0013	Phyllostachys_edulis_newGene_4030	-1.05073	PH01000118G0190	-1.80928
PH01002562G0020	-1.93842	PH01004228G0040	-1.16628	PH01000961G0160	-2.05069
PH01000057G1720	-2.31092	PH01001478G0050	-1.50202	PH01003941G0120	-1.30403
PH01001599G0330	-1.55842	PH01000700G0580	-1.655	PH01001143G0550	-2.33829
Phyllostachys_edulis_newGene_36283	-7.48814	Phyllostachys_edulis_newGene_76598	-2.0191	PH01000542G0140	-1.17586
Phyllostachys_edulis_newGene_37372	-1.49624	Phyllostachys_edulis_newGene_60073	-1.03571	Phyllostachys_edulis_newGene_83312	-3.13128
PH01001391G0440	-1.64569	PH01000030G2230	-1.38664	PH01000814G0570	-2.05208
PH01002980G0190	-4.28868	PH01000496G0070	-1.45699	PH01000589G0720	-3.36315
PH01000573G0720	-4.59574	PH01002786G0160	-2.0883	PH01000193G0320	-1.34973
Phyllostachys_edulis_newGene_60706	-3.09556	Phyllostachys_edulis_newGene_54026	-1.20749	PH01000300G0750	-1.39797
PH01000036G0350	-3.75617	Phyllostachys_edulis_newGene_6575	-1.39317	PH01005105G0030	-1.24076
Phyllostachys_edulis_newGene_28045	-1.29362	PH01002500G0170	-2.11857	PH01000717G0560	-2.75797
PH01000300G0060	-1.30319	PH01000653G0470	-3.26023	PH01000036G0650	-1.44269
Phyllostachys_edulis_newGene_77447	-1.98579	Phyllostachys_edulis_newGene_8261	-1.47998	PH01001182G0420	-2.13432
PH01000036G1710	-1.326	PH01000352G0070	-3.70919	Phyllostachys_edulis_newGene_43990	-4.53689
PH01000068G1860	-2.43193	PH01002287G0070	-1.59965	Phyllostachys_edulis_newGene_74237	-1.98678
PH01000302G0180	-3.31601	Phyllostachys_edulis_newGene_56345	-2.17484	PH01002837G0260	-1.85041
Phyllostachys_edulis_newGene_31743	-1.68831	PH01001102G0260	-1.27801	Phyllostachys_edulis_newGene_35561	-2.05253
Phyllostachys_edulis_newGene_44988	-5.2296	Phyllostachys_edulis_newGene_2380	-1.96534	PH01002785G0230	-2.42125
PH01000138G0560	-2.7958	Phyllostachys_edulis_newGene_83524	-1.255	PH01000788G0390	-2.65998
PH01080423G0010	-1.54854	PH01003838G0050	-3.365	PH01001039G0380	-1.92644
Phyllostachys_edulis_newGene_31667	-1.98062	PH01003207G0210	-1.25994	PH01000240G0440	-2.85576
PH01001229G0370	-4.47505	PH01003597G0240	-1.04938	PH01000531G0320	-2.85728
PH01005948G0040	-1.59553	Phyllostachys_edulis_newGene_23077	-1.35967	PH01000419G0820	-2.18512
Phyllostachys_edulis_newGene_35282	-1.28078	Phyllostachys_edulis_newGene_68397	-2.41883	Phyllostachys_edulis_newGene_31829	-3.61375
PH01000242G0910	-3.44216	Phyllostachys_edulis_newGene_48938	-1.50733	PH01000021G0060	-2.1921
PH01000375G0320	-2.38165	Phyllostachys_edulis_newGene_55595	-1.8098	PH01001891G0170	-2.37477
PH01000575G0620	-2.84508	PH01000170G0990	-1.29429	PH01001115G0500	-3.23047
PH01001969G0040	-2.24997	PH01004075G0080	-1.58236	Phyllostachys_edulis_newGene_48745	-4.0357
PH01018398G0010	-2.72442	PH01000906G0010	-1.05972	PH01000299G0660	-1.32216
PH01000287G0840	-3.83254	PH01000059G2100	-1.22507	PH01003535G0210	-1.25171
Phyllostachys_edulis_newGene_46104	-4.58396	Phyllostachys_edulis_newGene_42376	-1.39336	PH01000431G0910	-3.97512
PH01002070G0120	-4.0045	PH01000014G1430	-2.7062	PH01000008G0920	-1.64301
PH01000413G0560	-6.61819	PH01000605G0240	-2.16006	PH01003000G0020	-2.06799
Phyllostachys_edulis_newGene_79173	-3.41481	Phyllostachys_edulis_newGene_75324	-1.21325	PH01001467G0220	-2.61658
Phyllostachys_edulis_newGene_66767	-1.71338	Phyllostachys_edulis_newGene_43015	-2.66756	Phyllostachys_edulis_newGene_69334	-2.94333
PH01001516G0170	-2.10245	PH01000932G0150	-1.2505	PH01001248G0260	-1.00688
PH01000442G0880	-5.34827	PH01000182G0630	-1.76686	PH01000581G0350	-1.49684
PH01000180G1130	-3.78111	PH01003063G0270	-1.89661	PH01003710G0040	-2.67058
Phyllostachys_edulis_newGene_54643	-3.73926	Phyllostachys_edulis_newGene_68877	-1.38136	Phyllostachys_edulis_newGene_32663	-4.04394
Phyllostachys_edulis_newGene_44237	-5.86985	Phyllostachys_edulis_newGene_63757	-1.71852	PH01000612G0250	-1.45616
PH01000227G0560	-1.74748	Phyllostachys_edulis_newGene_50428	-1.97125	Phyllostachys_edulis_newGene_44457	-2.67255
Phyllostachys_edulis_newGene_31071	-2.69692	PH01000012G2420	-2.47083	PH01000063G1940	-1.28234
Phyllostachys_edulis_newGene_49797	-1.88219	PH01001881G0300	-1.53312	PH01000415G1000	-5.89092
PH01001071G0470	-2.93738	PH01003355G0260	-1.24837	Phyllostachys_edulis_newGene_77700	-1.93607
PH01001914G0170	-2.38199	PH01000207G0520	-2.20394	Phyllostachys_edulis_newGene_48253	-3.59872
PH01000779G0570	-2.6457	PH01000260G1270	-1.61034	PH01003868G0040	-3.88504
PH01272512G0010	-5.26472	Phyllostachys_edulis_newGene_59574	-1.49986	PH01002029G0030	-2.59037
PH01003433G0130	-3.67707	PH01002544G0040	-1.80213	PH01000125G1510	-1.01866
Phyllostachys_edulis_newGene_75688	-3.57377	Phyllostachys_edulis_newGene_8542	-2.43728	Phyllostachys_edulis_newGene_32102	-1.44219
Phyllostachys_edulis_newGene_290	-2.06188	Phyllostachys_edulis_newGene_47576	-1.18747	PH01000483G0220	-1.39163
PH01005281G0050	-4.20571	Phyllostachys_edulis_newGene_69248	-1.0723	PH01005133G0020	-1.49087
PH01006473G0020	-4.19856	Phyllostachys_edulis_newGene_30959	-1.58714	PH01001446G0280	-2.57492
PH01000124G0300	-1.64841	Phyllostachys_edulis_newGene_44708	-1.30226	PH01001519G0160	-1.60622
Phyllostachys_edulis_newGene_82536	-4.17355	PH01000045G1070	-2.62737	PH01001070G0600	-1.87439
Phyllostachys_edulis_newGene_25646	-3.60408	PH01000605G0690	-1.88031	Phyllostachys_edulis_newGene_30635	-3.20108
PH01000459G0310	-1.13847	PH01001280G0570	-2.40701	PH01000405G0010	-1.35753
PH01000310G0670	-4.87137	PH01180739G0010	-2.39674	Phyllostachys_edulis_newGene_30249	-1.05437
PH01000299G0440	-3.48992	PH01000044G0920	-1.58969	PH01000632G0570	-1.64769
PH01002506G0180	-1.2731	PH01001218G0130	-1.07892	Phyllostachys_edulis_newGene_28080	-2.75982
PH01000129G0360	-2.4884	PH01000130G1510	-1.11549	PH01002816G0040	-1.29401
PH01004147G0020	-1.66226	Phyllostachys_edulis_newGene_31596	-2.51592	PH01001863G0010	-1.00488
Phyllostachys_edulis_newGene_52096	-3.44204	PH01000309G1120	-3.92674	PH01000945G0070	-1.31177
PH01000312G0850	-2.81099	Phyllostachys_edulis_newGene_37709	-2.28736	PH01000911G0310	-1.09249
PH01001795G0410	-4.81009	Phyllostachys_edulis_newGene_29470	-1.33438	PH01000017G1100	-1.5868
PH01004401G0050	-1.63835	PH01001609G0400	-2.27194	PH01000378G0710	-2.56771
PH01001078G0420	-4.39209	Phyllostachys_edulis_newGene_64674	-1.57314	PH01000384G0860	-1.33303
PH01001118G0110	-1.5029	Phyllostachys_edulis_newGene_53163	-1.52532	PH01000957G0560	-1.67553
Phyllostachys_edulis_newGene_55116	-3.53532	Phyllostachys_edulis_newGene_80911	-1.14161	PH01000553G0290	-2.2502
PH01001364G0200	-3.13383	PH01000936G0470	-1.14322	PH01001258G0470	-1.60293
Phyllostachys_edulis_newGene_40154	-3.07901	PH01004971G0040	-1.13217	Phyllostachys_edulis_newGene_38796	-2.59803
Phyllostachys_edulis_newGene_34655	-3.56808	PH01002809G0210	-2.11019	Phyllostachys_edulis_newGene_81696	-1.68719
PH01001091G0370	-3.52347	Phyllostachys_edulis_newGene_39805	-2.09081	PH01001979G0320	-1.5356
PH01000930G0290	-3.44254	PH01000022G1070	-1.5592	PH01002049G0060	-4.38377
PH01000877G0110	-1.2143	PH01000009G2590	-2.97081	PH01000061G1320	-1.32612
PH01002604G0160	-1.57381	Phyllostachys_edulis_newGene_56374	-1.97677	PH01000300G0920	-2.18762
PH01003883G0100	-3.28874	Phyllostachys_edulis_newGene_48407	-1.22223	PH01005076G0020	-1.70705
PH01002865G0120	-2.33551	PH01000332G0150	-2.2097	PH01000208G0510	-2.73239
PH01000154G0800	-1.62084	PH01000142G0500	-1.32024	PH01000943G0170	-2.66125
Phyllostachys_edulis_newGene_26236	-1.92027	PH01000315G0180	-1.22697	Phyllostachys_edulis_newGene_36621	-1.58235
PH01001326G0560	-1.50741	PH01260580G0010	-1.61304	PH01000793G0180	-1.63909
PH01002563G0120	-1.05584	PH01000659G0450	-1.5459	PH01002389G0090	-1.50889
Phyllostachys_edulis_newGene_45438	-3.36241	PH01001045G0370	-1.43225	PH01000005G4060	-3.1099
Phyllostachys_edulis_newGene_34933	-3.38467	PH01000340G0740	-1.3452	PH01005174G0060	-1.08932
PH01001275G0330	-2.93122	Phyllostachys_edulis_newGene_55436	-1.98012	Phyllostachys_edulis_newGene_32209	-3.25345
Phyllostachys_edulis_newGene_47550	-2.24007	Phyllostachys_edulis_newGene_31053	-1.20885	PH01000049G0190	-1.80429
PH01005828G0050	-2.02459	PH01000925G0250	-1.96498	PH01003499G0050	-1.5111
Phyllostachys_edulis_newGene_64891	-4.80615	PH01000600G0380	-1.44912	PH01000090G0730	-3.89954
PH01003619G0110	-2.78728	Phyllostachys_edulis_newGene_29569	-1.06409	Phyllostachys_edulis_newGene_42260	-3.89772
Phyllostachys_edulis_newGene_49958	-1.72124	PH01001239G0620	-2.26662	PH01000938G0330	-1.89159
PH01000578G0270	-2.36134	PH01000516G0220	-1.84746	Phyllostachys_edulis_newGene_72390	-2.56966
Phyllostachys_edulis_newGene_30667	-3.43915	PH01000094G0690	-2.18195	Phyllostachys_edulis_newGene_45228	-3.21314
PH01002880G0050	-2.98631	PH01001011G0160	-2.18351	Phyllostachys_edulis_newGene_17038	-2.10471
Phyllostachys_edulis_newGene_74287	-2.59072	Phyllostachys_edulis_newGene_44220	-1.19534	PH01000834G0450	-1.50255
PH01000973G0210	-2.98274	Phyllostachys_edulis_newGene_42738	-1.81378	PH01002263G0230	-1.98338
PH01000698G0290	-1.50283	PH01000190G0300	-1.26759	PH01001677G0210	-1.34691
Phyllostachys_edulis_newGene_63781	-1.64654	Phyllostachys_edulis_newGene_34655	-1.45576	PH01000916G0140	-1.72359
PH01000316G0370	-6.53553	PH01000200G1170	-2.57131	PH01000592G0750	-2.38283
Phyllostachys_edulis_newGene_59677	-1.12906	PH01001529G0090	-1.15427	PH01000202G0880	-1.21507
PH01000850G0270	-4.66559	PH01000612G0780	-1.24864	PH01000950G0430	-1.94853
PH01002220G0280	-2.44724	Phyllostachys_edulis_newGene_29245	-1.40482	PH01000171G0710	-3.90459
Phyllostachys_edulis_newGene_53388	-1.05218	Phyllostachys_edulis_newGene_7965	-1.05634	PH01000630G0440	-2.56168
PH01004610G0160	-2.23772	PH01000284G0340	-1.99642	PH01005496G0070	-2.32545
PH01003431G0100	-1.52376	PH01002207G0170	-1.08781	PH01000123G1400	-2.74637
PH01000002G3730	-2.38724	PH01000018G2330	-1.22171	PH01000261G1190	-1.90242
PH01000548G0070	-2.45801	PH01000276G0640	-1.53683	PH01002161G0050	-3.63252
PH01000023G1400	-1.54912	PH01000004G0240	-1.37327	Phyllostachys_edulis_newGene_66838	-3.0575
PH01000743G0130	-1.93998	Phyllostachys_edulis_newGene_27653	-2.56035	PH01000353G0230	-3.26823
PH01000014G1170	-2.34398	PH01000387G0730	-1.51332	PH01000236G0970	-2.63809
PH01002178G0110	-4.37431	Phyllostachys_edulis_newGene_48859	-1.73026	PH01004602G0080	-1.96136
PH01000173G0200	-4.75478	PH01001914G0300	-2.18941	PH01002755G0230	-1.2504
Phyllostachys_edulis_newGene_36902	-1.90133	PH01000465G0110	-1.08599	PH01001907G0090	-1.97825
PH01001474G0270	-1.90794	Phyllostachys_edulis_newGene_61893	-1.25068	Phyllostachys_edulis_newGene_50771	-1.88694
PH01000622G0470	-4.51398	Phyllostachys_edulis_newGene_44025	-1.99591	PH01000099G1140	-2.46304
PH01000355G0220	-2.36556	Phyllostachys_edulis_newGene_74992	-1.08944	PH01003857G0150	-3.60251
Phyllostachys_edulis_newGene_62271	-4.65172	Phyllostachys_edulis_newGene_55025	-1.77845	PH01000112G1050	-2.25298
PH01001298G0250	-4.99515	Phyllostachys_edulis_newGene_62295	-2.54206	PH01000054G0330	-3.19684
PH01002298G0160	-2.83443	Phyllostachys_edulis_newGene_37738	-1.2345	Phyllostachys_edulis_newGene_58967	-3.18071
PH01000514G0770	-1.09916	Phyllostachys_edulis_newGene_52744	-1.43022	PH01000317G0180	-2.33269
Phyllostachys_edulis_newGene_20829	-2.27504	PH01001631G0300	-1.03614	PH01000361G0550	-1.03098
PH01000795G0710	-2.72258	PH01000943G0090	-2.42067	PH01002478G0010	-1.86172
PH01000051G0520	-1.61263	PH01001794G0130	-1.11389	PH01000494G0590	-5.47711
PH01001087G0490	-4.0372	PH01000045G0080	-1.81393	Phyllostachys_edulis_newGene_62259	-2.37972
PH01000286G0870	-1.20044	PH01000118G1150	-1.52844	PH01000268G0100	-1.63662
Phyllostachys_edulis_newGene_87475	-2.57783	Phyllostachys_edulis_newGene_69417	-2.31503	PH01000102G0440	-1.51552
PH01000026G1260	-5.72488	Phyllostachys_edulis_newGene_51244	-1.32181	Phyllostachys_edulis_newGene_51400	-1.17418
Phyllostachys_edulis_newGene_50360	-1.5332	Phyllostachys_edulis_newGene_44048	-2.31065	PH01003284G0150	-1.39007
PH01002388G0260	-3.50414	PH01000967G0040	-6.38891	PH01000092G0950	-2.47242
PH01000739G0530	-2.86536	PH01000948G0270	-1.04206	Phyllostachys_edulis_newGene_19454	-1.23015
Phyllostachys_edulis_newGene_9450	-3.98597	PH01000727G0250	-2.69879	PH01001071G0240	-1.47611
PH01003426G0040	-1.8697	Phyllostachys_edulis_newGene_75648	-1.14276	PH01005129G0070	-1.53649
PH01004198G0120	-2.53178	PH01001845G0410	-1.80514	PH01000114G0570	-2.00666
PH01000810G0580	-1.39722	PH01132769G0010	-2.13795	PH01000182G0140	-1.43439
PH01002974G0110	-3.01112	Phyllostachys_edulis_newGene_68133	-1.86137	PH01003824G0130	-2.61205
PH01000070G1470	-1.62057	PH01000249G1050	-1.29763	PH01001480G0360	-2.28087
PH01000031G2300	-7.15095	PH01004198G0120	-1.57323	PH01014988G0010	-2.14302
Phyllostachys_edulis_newGene_72464	-1.28274	PH01000820G0220	-2.12652	PH01000036G2310	-2.32446
PH01001475G0370	-3.0395	PH01000399G0720	-1.63045	PH01000683G0620	-1.96956
Phyllostachys_edulis_newGene_42216	-1.51626	PH01002161G0050	-1.94149	Phyllostachys_edulis_newGene_49326	-6.03246
PH01000130G1350	-2.21206	PH01001724G0160	-1.86697	Phyllostachys_edulis_newGene_62245	-3.94274
Phyllostachys_edulis_newGene_46088	-3.45529	PH01000885G0130	-1.10652	PH01000654G0050	-2.60307
PH01000081G0220	-4.85996	PH01000306G0790	-1.05955	PH01000233G0070	-2.72482
Phyllostachys_edulis_newGene_17434	-4.63718	PH01001295G0520	-1.97139	PH01001690G0310	-2.95721
PH01004897G0010	-2.12266	Phyllostachys_edulis_newGene_52398	-1.89949	Phyllostachys_edulis_newGene_63261	-1.24647
Phyllostachys_edulis_newGene_76296	-2.94008	Phyllostachys_edulis_newGene_79422	-1.45677	PH01000110G1470	-1.8542
Phyllostachys_edulis_newGene_52194	-1.19624	PH01000769G0210	-1.6668	PH01001628G0230	-3.50805
PH01000343G0770	-3.90919	Phyllostachys_edulis_newGene_58504	-1.74349	PH01091146G0010	-2.39344
PH01000378G0150	-1.42956	PH01009255G0030	-1.00712	Phyllostachys_edulis_newGene_34138	-3.10951
PH01153588G0010	-1.63169	PH01000207G0510	-1.06495	PH01000161G1020	-2.09518
PH01000174G0140	-1.211	PH01000397G0880	-1.21261	Phyllostachys_edulis_newGene_30748	-2.20357
Phyllostachys_edulis_newGene_52991	-2.29795	PH01002971G0240	-1.61704	Phyllostachys_edulis_newGene_43977	-1.86698
PH01000078G0500	-3.41712	PH01004523G0030	-1.39951	Phyllostachys_edulis_newGene_77728	-1.39068
PH01000195G0990	-1.79045	Phyllostachys_edulis_newGene_83630	-1.52197	Phyllostachys_edulis_newGene_67147	-4.79192
Phyllostachys_edulis_newGene_67521	-1.5146	PH01001245G0400	-1.16921	PH01002845G0020	-1.84252
PH01002290G0270	-2.30871	PH01000356G0220	-1.65848	PH01000609G0250	-2.49577
PH01000114G0450	-2.36275	PH01003371G0200	-2.01597	PH01002698G0140	-1.19716
Phyllostachys_edulis_newGene_10534	-4.20388	PH01000078G0690	-1.86823	PH01000131G1340	-4.10163
Phyllostachys_edulis_newGene_62551	-1.94344	PH01000897G0020	-1.52858	PH01001916G0130	-3.43575
PH01001942G0200	-2.84239	PH01004114G0010	-2.21777	Phyllostachys_edulis_newGene_20709	-3.69211
PH01000417G1040	-2.32991	PH01000546G0870	-1.18345	PH01001378G0510	-2.68892
PH01002178G0190	-1.46116	PH01224347G0010	-2.10489	Phyllostachys_edulis_newGene_86771	-4.56961
PH01000716G0680	-2.9436	Phyllostachys_edulis_newGene_41030	-1.5278	PH01000818G0620	-1.64122
Phyllostachys_edulis_newGene_29569	-3.71873	Phyllostachys_edulis_newGene_69637	-1.58273	Phyllostachys_edulis_newGene_74665	-1.7711
PH01005814G0020	-4.59657	PH01003959G0060	-1.47141	PH01003880G0040	-3.00528
Phyllostachys_edulis_newGene_71802	-1.65425	PH01001577G0380	-1.5905	Phyllostachys_edulis_newGene_60813	-2.09031
PH01000135G1340	-2.24746	PH01000881G0510	-1.21108	PH01001134G0390	-1.93955
PH01000721G0480	-2.27541	PH01002267G0100	-2.6383	PH01000714G0600	-1.0353
PH01000018G1850	-4.69339	Phyllostachys_edulis_newGene_9719	-1.91007	PH01000203G0670	-1.2888
Phyllostachys_edulis_newGene_66446	-3.02026	PH01006808G0050	-1.26158	PH01000706G0720	-1.20839
PH01000368G0150	-1.46251	PH01000042G0280	-1.50433	PH01003768G0010	-2.31508
PH01000012G1640	-3.54575	Phyllostachys_edulis_newGene_35042	-1.10504	PH01000357G0230	-1.76869
Phyllostachys_edulis_newGene_42606	-3.46095	PH01000174G1510	-1.25275	PH01000625G0630	-2.26944
Phyllostachys_edulis_newGene_67145	-3.65659	Phyllostachys_edulis_newGene_45122	-1.01246	PH01002194G0180	-1.5927
PH01000004G2830	-4.66837	Phyllostachys_edulis_newGene_37620	-1.03485	Phyllostachys_edulis_newGene_43470	-4.24871
PH01000168G0410	-4.16796	PH01000291G1090	-1.28566	Phyllostachys_edulis_newGene_77773	-4.31735
Phyllostachys_edulis_newGene_45929	-2.77379	Phyllostachys_edulis_newGene_76918	-1.07864	PH01001937G0190	-2.65048
PH01000656G0560	-4.77509	Phyllostachys_edulis_newGene_74302	-1.00626	PH01001343G0320	-2.61767
PH01002302G0280	-1.15476	Phyllostachys_edulis_newGene_61776	-1.25838	PH01000385G0640	-2.15469
PH01001528G0320	-1.95865	PH01006473G0020	-1.16199	PH01003281G0080	-4.13566
Phyllostachys_edulis_newGene_57912	-1.204	Phyllostachys_edulis_newGene_68295	-1.92583	Phyllostachys_edulis_newGene_33230	-2.51362
Phyllostachys_edulis_newGene_87763	-1.63705	PH01003643G0140	-1.22951	PH01001035G0130	-4.68727
PH01000287G0350	-3.52856	Phyllostachys_edulis_newGene_26227	-1.66659	PH01000174G1210	-2.12965
Phyllostachys_edulis_newGene_78476	-1.12218	PH01000000G2440	-1.24976	PH01003497G0090	-1.11408
Phyllostachys_edulis_newGene_25394	-2.91043	Phyllostachys_edulis_newGene_66572	-3.34189	Phyllostachys_edulis_newGene_33861	-4.67461
Phyllostachys_edulis_newGene_58350	-1.12347	Phyllostachys_edulis_newGene_34677	-1.74503	Phyllostachys_edulis_newGene_25623	-2.08953
PH01009868G0020	-2.79449	Phyllostachys_edulis_newGene_15876	-1.57584	PH01003820G0150	-2.28958
PH01000013G1310	-1.51962	Phyllostachys_edulis_newGene_7285	-2.96486	Phyllostachys_edulis_newGene_41811	-2.27168
Phyllostachys_edulis_newGene_27805	-3.32445	PH01013299G0010	-1.84683	PH01004767G0040	-1.93967
PH01000956G0230	-2.1935	PH01000520G0340	-1.34765	PH01001217G0570	-3.93538
PH01006143G0050	-3.06972	PH01000019G0220	-1.80451	PH01003189G0030	-2.56438
PH01000329G0160	-4.81602	Phyllostachys_edulis_newGene_34083	-1.3123	PH01001855G0080	-1.74934
PH01001015G0560	-4.22865	PH01000003G3120	-1.45456	PH01106225G0010	-3.08046
PH01001262G0260	-3.8693	Phyllostachys_edulis_newGene_11525	-2.63571	Phyllostachys_edulis_newGene_28942	-1.7412
Phyllostachys_edulis_newGene_66230	-1.12212	Phyllostachys_edulis_newGene_69902	-1.87346	PH01000642G0150	-2.12835
PH01000195G0800	-1.37344	PH01001391G0430	-1.96957	Phyllostachys_edulis_newGene_66384	-1.55293
PH01000027G1530	-2.1941	Phyllostachys_edulis_newGene_77782	-2.16289	PH01002021G0200	-3.06035
PH01001772G0400	-1.7542	Phyllostachys_edulis_newGene_80123	-1.53745	PH01000056G1500	-2.86035
PH01003922G0080	-2.95707	PH01000972G0490	-1.04634	PH01001784G0070	-3.32981
Phyllostachys_edulis_newGene_63420	-2.12802	Phyllostachys_edulis_newGene_39639	-1.1384	PH01000034G1380	-2.04
PH01000629G0380	-1.93397	Phyllostachys_edulis_newGene_27501	-2.10298	PH01000732G0070	-2.56744
PH01000032G0890	-1.4851	PH01000957G0560	-1.51402	PH01000218G0100	-2.47593
Phyllostachys_edulis_newGene_87912	-1.34651	PH01000932G0720	-1.17657	PH01001983G0020	-1.95006
PH01000926G0410	-1.08373	Phyllostachys_edulis_newGene_88422	-1.28253	PH01000619G0280	-2.0008
PH01000266G0010	-3.18508	Phyllostachys_edulis_newGene_77855	-1.80363	PH01001759G0130	-2.36224
Phyllostachys_edulis_newGene_26890	-3.39784	Phyllostachys_edulis_newGene_56395	-1.16708	PH01000252G0500	-1.84408
PH01002290G0110	-1.89029	Phyllostachys_edulis_newGene_25733	-1.55638	PH01001681G0390	-2.36675
PH01000514G0270	-1.4494	Phyllostachys_edulis_newGene_67496	-1.42943	PH01001204G0070	-2.60338
Phyllostachys_edulis_newGene_86407	-1.88713	Phyllostachys_edulis_newGene_68332	-1.68833	Phyllostachys_edulis_newGene_57714	-1.80666
PH01002002G0080	-3.67058	PH01000358G0650	-2.02783	Phyllostachys_edulis_newGene_17001	-3.4972
PH01002691G0060	-4.50484	PH01002819G0050	-1.24371	PH01001763G0400	-1.78919
PH01000411G0510	-2.1441	Phyllostachys_edulis_newGene_22995	-1.08371	Phyllostachys_edulis_newGene_44114	-2.02815
PH01001227G0170	-5.1673	Phyllostachys_edulis_newGene_67346	-1.1603	PH01002036G0280	-1.19372
PH01000014G2120	-4.92872	Phyllostachys_edulis_newGene_52700	-1.62415	PH01000655G0730	-2.1365
Phyllostachys_edulis_newGene_55595	-1.13723	PH01000077G0950	-1.15496	PH01000720G0320	-1.60241
PH01001523G0110	-3.26295	PH01001785G0160	-3.0968	PH01000313G0880	-2.5356
PH01000814G0170	-1.15795	PH01001136G0420	-2.28878	PH01000402G1070	-1.35167
PH01000294G0920	-2.40091	PH01022497G0010	-1.27785	PH01000881G0070	-2.78809
PH01003138G0030	-1.18045	Phyllostachys_edulis_newGene_28559	-1.13134	PH01000383G0390	-1.65733
PH01000456G0940	-3.10051	PH01002236G0120	-2.25901	PH01000260G0620	-1.24586
PH01008194G0030	-2.63973	PH01000870G0270	-1.81198	PH01000724G0230	-2.2147
PH01001327G0480	-3.52544	PH01000173G0130	-1.64061	Phyllostachys_edulis_newGene_34442	-1.95111
Phyllostachys_edulis_newGene_42102	-1.28464	PH01002106G0200	-1.06038	Phyllostachys_edulis_newGene_86117	-2.8012
PH01000005G1300	-3.9072	PH01001011G0460	-1.17357	PH01000267G0670	-1.8997
PH01008005G0010	-2.17691	Phyllostachys_edulis_newGene_59567	-1.61853	PH01002887G0240	-1.36476
PH01000009G2590	-1.2275	PH01003094G0090	-1.66517	Phyllostachys_edulis_newGene_20481	-2.63279
Phyllostachys_edulis_newGene_80750	-1.31536	PH01000276G0370	-1.12743	PH01000700G0160	-2.32926
PH01000004G2710	-4.42955	PH01003340G0250	-1.67603	Phyllostachys_edulis_newGene_35062	-1.844
Phyllostachys_edulis_newGene_40776	-4.67004	PH01000201G0980	-1.62381	PH01000008G1430	-1.22822
PH01000149G0400	-2.85549	PH01000732G0040	-1.50558	PH01004181G0150	-1.6657
PH01002113G0120	-2.52801	PH01001028G0230	-1.00483	PH01001094G0480	-3.22862
PH01000720G0670	-1.67599	Phyllostachys_edulis_newGene_81547	-2.61362	PH01000362G0370	-1.09008
PH01002872G0020	-3.10411	Phyllostachys_edulis_newGene_71677	-1.75379	PH01000161G0890	-2.66367
PH01000355G0090	-6.5689	PH01001178G0330	-1.10884	PH01000672G0550	-3.62268
PH01000573G0670	-5.58746	PH01000196G1170	-2.21328	Phyllostachys_edulis_newGene_50587	-1.98509
PH01001261G0230	-1.62209	PH01000570G0480	-1.23002	PH01000049G0580	-2.98378
PH01001305G0130	-2.98158	PH01002246G0310	-1.41475	PH01000411G0930	-3.92656
PH01004803G0050	-3.14875	PH01001379G0200	-1.0026	PH01000058G1140	-3.91482
PH01002587G0010	-2.64573	Phyllostachys_edulis_newGene_85189	-2.93617	PH01000272G0010	-2.34605
Phyllostachys_edulis_newGene_65568	-4.14596	PH01000573G0670	-1.52823	PH01001151G0400	-2.40026
PH01000356G0040	-3.31482	Phyllostachys_edulis_newGene_36768	-1.33335	Phyllostachys_edulis_newGene_30320	-1.87477
PH01001496G0430	-1.9297	PH01000738G0520	-1.29903	PH01004427G0040	-2.83516
PH01004328G0130	-1.6852	PH01000002G2930	-1.64325	Phyllostachys_edulis_newGene_31414	-3.24273
PH01000152G0730	-2.67408	Phyllostachys_edulis_newGene_66606	-1.88977	PH01000620G0360	-1.0254
PH01000372G0480	-2.09871	Phyllostachys_edulis_newGene_27006	-1.44605	PH01000732G0580	-1.85885
Phyllostachys_edulis_newGene_55770	-1.8895	Phyllostachys_edulis_newGene_80221	-1.47575	Phyllostachys_edulis_newGene_34546	-1.35443
PH01000222G0700	-2.08967	PH01000975G0340	-1.85647	PH01000687G0880	-1.15638
Phyllostachys_edulis_newGene_10531	-3.08157	Phyllostachys_edulis_newGene_48665	-1.52735	Phyllostachys_edulis_newGene_65832	-1.49265
Phyllostachys_edulis_newGene_70818	-2.70745	Phyllostachys_edulis_newGene_38801	-1.13377	PH01002890G0210	-2.96443
PH01000013G0420	-3.58703	Phyllostachys_edulis_newGene_49068	-1.24817	PH01000143G0830	-4.69377
PH01002098G0130	-3.21159	PH01000215G0610	-1.40724	Phyllostachys_edulis_newGene_32238	-2.3781
PH01000087G1820	-2.36099	PH01000157G0050	-1.11501	PH01000431G1030	-2.21417
Phyllostachys_edulis_newGene_48153	-2.98872	Phyllostachys_edulis_newGene_66008	-1.42394	Phyllostachys_edulis_newGene_40855	-2.28821
PH01001802G0120	-1.79566	PH01000126G0310	-1.13471	PH01001955G0160	-3.47282
Phyllostachys_edulis_newGene_65951	-2.28109	PH01000853G0020	-1.32836	Phyllostachys_edulis_newGene_86565	-2.29191
Phyllostachys_edulis_newGene_40980	-1.19403	PH01000641G0130	-1.22793	Phyllostachys_edulis_newGene_81313	-4.19694
PH01003023G0120	-1.91292	PH01004272G0020	-2.86234	PH01001567G0410	-1.70114
PH01000016G1570	-4.8248	PH01000092G1660	-2.72123	Phyllostachys_edulis_newGene_87182	-4.58644
PH01000044G0590	-2.63225	Phyllostachys_edulis_newGene_17749	-1.96045	Phyllostachys_edulis_newGene_52737	-1.43248
Phyllostachys_edulis_newGene_40747	-2.12763	Phyllostachys_edulis_newGene_65569	-2.62537	PH01000408G0520	-2.22158
PH01001011G0290	-3.64964	PH01000214G1110	-1.12896	PH01238153G0010	-1.57757
Phyllostachys_edulis_newGene_59036	-2.08001	Phyllostachys_edulis_newGene_48779	-1.58984	PH01002744G0050	-1.56073
PH01001429G0080	-1.97948	PH01001546G0080	-1.16161	PH01000706G0110	-1.94745
Phyllostachys_edulis_newGene_43244	-2.37189	PH01000246G1010	-1.2274	PH01001030G0470	-3.80481
PH01001659G0220	-2.29635	PH01000933G0100	-1.14012	Phyllostachys_edulis_newGene_54154	-2.24028
PH01000044G0910	-2.47982	Phyllostachys_edulis_newGene_34000	-1.22599	PH01000102G1710	-2.42544
PH01024445G0010	-3.85245	PH01000005G3370	-1.48758	Phyllostachys_edulis_newGene_36835	-1.72803
PH01000309G1120	-3.90521	PH01001643G0210	-1.43844	PH01000295G0320	-2.6122
PH01000863G0750	-1.92486	PH01000317G0730	-2.4491	PH01002103G0400	-1.23023
Phyllostachys_edulis_newGene_52961	-1.64123	PH01004470G0050	-1.50028	Phyllostachys_edulis_newGene_36976	-3.85901
PH01003895G0020	-3.51022	Phyllostachys_edulis_newGene_56423	-1.9558	PH01002417G0290	-1.42523
Phyllostachys_edulis_newGene_66287	-1.47712	Phyllostachys_edulis_newGene_80533	-1.4043	PH01000381G0280	-1.18256
Phyllostachys_edulis_newGene_56101	-2.07649	Phyllostachys_edulis_newGene_83809	-1.28037	PH01000002G3370	-1.01857
Phyllostachys_edulis_newGene_82733	-1.98872	Phyllostachys_edulis_newGene_33891	-1.34848	PH01000068G0320	-2.94471
Phyllostachys_edulis_newGene_23594	-3.50818	Phyllostachys_edulis_newGene_75548	-1.73362	PH01001829G0120	-3.1614
PH01000554G0210	-1.07249	PH01001571G0310	-1.56293	PH01003454G0070	-3.52492
Phyllostachys_edulis_newGene_74104	-1.28194	Phyllostachys_edulis_newGene_31084	-1.37193	Phyllostachys_edulis_newGene_26846	-2.67996
PH01000778G0480	-2.51819	Phyllostachys_edulis_newGene_65387	-1.17761	PH01007114G0040	-2.65271
PH01001974G0340	-3.42583	PH01000003G0420	-1.07969	PH01000505G0440	-2.074
Phyllostachys_edulis_newGene_87232	-4.02388	Phyllostachys_edulis_newGene_69871	-1.74609	PH01004598G0010	-1.67642
PH01001136G0170	-6.88774	Phyllostachys_edulis_newGene_36020	-1.03981	Phyllostachys_edulis_newGene_49612	-2.26107
PH01000172G1020	-2.92555	PH01004321G0060	-2.1315	Phyllostachys_edulis_newGene_73558	-1.66049
Phyllostachys_edulis_newGene_56795	-4.59916	PH01000158G0980	-1.15818	Phyllostachys_edulis_newGene_50820	-1.76408
PH01001484G0280	-5.87499	PH01000432G0500	-1.05258	PH01000019G1450	-1.05567
PH01000361G0860	-5.67275	PH01000192G0020	-1.9003	PH01000046G0660	-2.41624
Phyllostachys_edulis_newGene_74448	-3.98649	PH01000771G0580	-1.37542	PH01008259G0010	-1.42509
PH01000065G0260	-2.53031	Phyllostachys_edulis_newGene_54790	-1.81738	Phyllostachys_edulis_newGene_37255	-2.80972
PH01004525G0040	-2.92724	Phyllostachys_edulis_newGene_77702	-2.87367	PH01000178G0170	-4.53724
PH01000733G0260	-3.16199	PH01001262G0260	-1.38655	PH01000408G0180	-2.87535
PH01001860G0200	-3.21154	PH01001527G0020	-1.21048	PH01000001G1880	-2.48177
PH01000343G0240	-1.89057	Phyllostachys_edulis_newGene_82728	-1.09948	PH01001071G0540	-2.68664
PH01002606G0090	-1.82046	Phyllostachys_edulis_newGene_36660	-2.14858	PH01002328G0180	-2.4778
PH01000074G0590	-3.73012	PH01000174G1100	-1.02283	Phyllostachys_edulis_newGene_48567	-1.6718
PH01001945G0220	-1.52423	PH01001792G0100	-1.11025	PH01002057G0150	-2.16426
PH01001150G0090	-3.33865	Phyllostachys_edulis_newGene_22391	-1.60388	PH01003153G0130	-2.99469
Phyllostachys_edulis_newGene_25718	-1.29835	Phyllostachys_edulis_newGene_32191	-1.57573	PH01000110G1030	-1.55454
Phyllostachys_edulis_newGene_80107	-2.57908	Phyllostachys_edulis_newGene_61701	-1.28895	PH01000193G0070	-1.93706
PH01005718G0070	-3.16415	PH01000323G0730	-1.49977	PH01000317G0580	-2.1919
Phyllostachys_edulis_newGene_57699	-5.54256	PH01000041G2150	-1.67413	Phyllostachys_edulis_newGene_31797	-2.84209
Phyllostachys_edulis_newGene_68296	-4.65548	PH01098998G0010	-2.1103	PH01001009G0200	-1.26114
Phyllostachys_edulis_newGene_33394	-1.19651	Phyllostachys_edulis_newGene_63525	-1.67178	Phyllostachys_edulis_newGene_39986	-2.5195
PH01000595G0420	-1.93361	Phyllostachys_edulis_newGene_33468	-3.89876	Phyllostachys_edulis_newGene_34359	-3.73204
PH01000226G0670	-4.7843	PH01000696G0390	-1.40088	Phyllostachys_edulis_newGene_47085	-3.48608
PH01000662G0760	-1.83091	Phyllostachys_edulis_newGene_8924	-1.90185	PH01000407G0960	-2.32781
PH01000104G1330	-1.87895	PH01001577G0230	-1.306	PH01001543G0210	-1.17627
Phyllostachys_edulis_newGene_46228	-1.94336	Phyllostachys_edulis_newGene_38538	-1.29696	PH01000211G0790	-3.59175
PH01104104G0010	-6.16424	Phyllostachys_edulis_newGene_35075	-1.28529	PH01002698G0160	-2.21638
PH01002517G0130	-2.08995	Phyllostachys_edulis_newGene_35771	-1.41094	PH01000158G0940	-1.81782
PH01001529G0060	-4.0899	Phyllostachys_edulis_newGene_41794	-2.271	PH01003839G0030	-4.05134
Phyllostachys_edulis_newGene_33755	-2.00561	Phyllostachys_edulis_newGene_31239	-1.02934	PH01001003G0370	-1.89932
Phyllostachys_edulis_newGene_29960	-2.87616	PH01004034G0030	-1.48755	Phyllostachys_edulis_newGene_34303	-2.59186
PH01159620G0010	-5.26315	PH01001963G0320	-1.12339	Phyllostachys_edulis_newGene_34855	-5.03115
PH01004272G0020	-1.56815	PH01000176G0540	-1.01939	Phyllostachys_edulis_newGene_31321	-1.96806
PH01001845G0190	-1.78688	Phyllostachys_edulis_newGene_53088	-1.45244	PH01000165G1070	-1.96855
PH01145882G0010	-4.23274	PH01000350G0070	-1.26326	PH01000142G0800	-2.0778
Phyllostachys_edulis_newGene_87436	-1.8279	Phyllostachys_edulis_newGene_79930	-1.92071	PH01003351G0070	-4.75008
Phyllostachys_edulis_newGene_54636	-5.88189	PH01001371G0480	-1.83572	PH01002444G0270	-1.97439
PH01000661G0760	-1.89604	PH01004006G0090	-1.73181	PH01000614G0200	-3.46961
Phyllostachys_edulis_newGene_48407	-2.79491	Phyllostachys_edulis_newGene_28350	-1.73809	PH01002049G0230	-1.41229
PH01000693G0460	-5.84565	PH01000439G0680	-2.32083	Phyllostachys_edulis_newGene_36700	-2.84455
PH01218787G0010	-2.17189	Phyllostachys_edulis_newGene_86980	-1.63626	Phyllostachys_edulis_newGene_30329	-2.15026
PH01000002G0050	-5.30171	PH01002984G0160	-1.26043	PH01000767G0430	-1.45128
Phyllostachys_edulis_newGene_74873	-3.58418	Phyllostachys_edulis_newGene_46382	-1.1261	Phyllostachys_edulis_newGene_42952	-2.22914
Phyllostachys_edulis_newGene_34531	-1.54832	Phyllostachys_edulis_newGene_74608	-1.04675	PH01000477G0740	-1.95642
PH01000720G0260	-2.28553	PH01000576G0170	-1.51293	PH01000569G0690	-2.17788
PH01003594G0040	-2.70682	PH01001283G0510	-1.12026	PH01003110G0010	-3.97457
PH01002395G0300	-2.80985	PH01000706G0050	-2.35586	PH01001650G0210	-2.04222
PH01000004G3030	-1.63089	PH01000171G0720	-1.07557	PH01001599G0050	-1.47015
PH01003421G0140	-3.45189	PH01005115G0100	-1.24177	PH01001357G0070	-1.50511
PH01000320G0990	-4.23664	Phyllostachys_edulis_newGene_17059	-1.44896	Phyllostachys_edulis_newGene_50317	-1.2919
PH01003370G0060	-1.83716	Phyllostachys_edulis_newGene_68773	-1.07767	Phyllostachys_edulis_newGene_26656	-3.26697
PH01000287G1230	-2.71921	PH01002707G0220	-2.5449	PH01000374G0610	-1.98907
Phyllostachys_edulis_newGene_85544	-3.05256	PH01000055G1880	-1.2749	PH01000673G0710	-1.03447
Phyllostachys_edulis_newGene_21490	-2.42181	PH01001583G0220	-1.54354	PH01002584G0270	-1.35551
Phyllostachys_edulis_newGene_29056	-2.85442	Phyllostachys_edulis_newGene_55786	-1.83786	PH01001382G0370	-3.6228
Phyllostachys_edulis_newGene_52906	-2.812	PH01003464G0160	-1.49446	Phyllostachys_edulis_newGene_73548	-1.48616
PH01000439G0610	-4.24391	Phyllostachys_edulis_newGene_62367	-1.21408	PH01000044G1520	-1.3296
PH01001371G0120	-1.02564	PH01001288G0020	-1.09981	Phyllostachys_edulis_newGene_55816	-3.79919
PH01000569G0500	-1.53806	Phyllostachys_edulis_newGene_68252	-1.34561	PH01000360G0570	-2.91623
Phyllostachys_edulis_newGene_81695	-2.68002	Phyllostachys_edulis_newGene_11661	-1.77903	PH01003333G0020	-1.54775
Phyllostachys_edulis_newGene_37940	-4.02721	Phyllostachys_edulis_newGene_41580	-1.10811	PH01000587G0810	-2.25305
PH01001248G0220	-3.04039	PH01000345G0300	-2.06453	PH01001205G0170	-2.53892
PH01001490G0020	-1.30255	Phyllostachys_edulis_newGene_52436	-1.89765	PH01000598G0540	-1.31858
PH01001236G0270	-3.40205	PH01001891G0070	-2.00934	Phyllostachys_edulis_newGene_44684	-1.07737
Phyllostachys_edulis_newGene_43700	-1.74051	PH01000045G0750	-1.0907	PH01002908G0200	-2.99231
PH01000095G1010	-2.18439	PH01005900G0020	-1.3665	PH01000640G0790	-1.04213
PH01005579G0050	-1.97296	PH01000106G1400	-1.75712	Phyllostachys_edulis_newGene_50838	-4.69121
Phyllostachys_edulis_newGene_83207	-3.93293	PH01001010G0220	-1.40865	PH01000115G0120	-1.58332
PH01001239G0490	-2.10816	Phyllostachys_edulis_newGene_20084	-1.79945	PH01001192G0030	-1.61265
PH01000062G0920	-1.1716	PH01000152G0440	-1.83774	Phyllostachys_edulis_newGene_72069	-2.19764
PH01002139G0430	-4.11276	PH01000598G0790	-2.02397	Phyllostachys_edulis_newGene_54051	-2.96006
PH01004676G0020	-4.52934	PH01000122G1640	-1.80241	Phyllostachys_edulis_newGene_80183	-2.46937
PH01000012G0930	-3.62894	Phyllostachys_edulis_newGene_62903	-2.44612	PH01004823G0140	-1.16236
PH01001695G0270	-3.00877	Phyllostachys_edulis_newGene_77571	-1.78511	PH01000010G2350	-1.23397
PH01000005G4150	-1.42573	PH01002431G0320	-1.96	PH01002135G0120	-5.42192
PH01002705G0160	-2.68374	PH01000205G0750	-1.28508	PH01006046G0080	-2.01194
PH01002839G0160	-1.84823	Phyllostachys_edulis_newGene_47577	-1.61774	PH01000130G1470	-1.10433
PH01000327G0800	-3.64125	Phyllostachys_edulis_newGene_68717	-1.37872	PH01000056G0500	-2.32913
PH01000595G0470	-4.07264	PH01002818G0240	-2.07256	PH01003141G0240	-3.3158
PH01000762G0520	-2.97654	PH01003205G0110	-1.91724	PH01003739G0070	-1.13309
PH01000190G1150	-1.2831	PH01002242G0010	-1.40482	PH01000363G0960	-2.30853
PH01000825G0150	-2.26478	PH01000024G2200	-1.68107	PH01003923G0240	-4.38209
PH01000157G1170	-3.28951	PH01003179G0070	-1.24649	PH01001597G0310	-1.76055
PH01002017G0380	-2.38858	PH01000001G0190	-1.56356	Phyllostachys_edulis_newGene_25766	-1.17167
PH01000195G0070	-2.00902	Phyllostachys_edulis_newGene_51214	-1.32198	PH01000834G0140	-2.25473
Phyllostachys_edulis_newGene_41152	-2.1423	PH01000130G0720	-1.71617	PH01003169G0020	-2.11236
PH01000466G0080	-2.14684	PH01001785G0170	-1.30329	Phyllostachys_edulis_newGene_4868	-2.28037
PH01000000G6760	-2.10541	Phyllostachys_edulis_newGene_66351	-1.45592	PH01000723G0340	-2.22259
PH01001198G0300	-2.20609	Phyllostachys_edulis_newGene_23899	-2.13477	Phyllostachys_edulis_newGene_29198	-1.77704
PH01000491G0330	-1.00122	Phyllostachys_edulis_newGene_33549	-1.17749	PH01180262G0010	-1.77523
PH01003023G0190	-4.2948	Phyllostachys_edulis_newGene_44944	-1.91206	PH01000087G1790	-2.66799
Phyllostachys_edulis_newGene_72541	-2.32495	Phyllostachys_edulis_newGene_38146	-1.39776	PH01001378G0310	-2.70777
PH01007017G0020	-3.68573	PH01210328G0010	-1.4177	PH01000523G0090	-1.57529
Phyllostachys_edulis_newGene_7607	-1.31817	PH01000021G0780	-1.24669	PH01001792G0100	-3.39017
PH01000110G1240	-2.91187	PH01000234G0090	-2.27557	PH01000840G0550	-3.93557
Phyllostachys_edulis_newGene_70869	-1.41246	Phyllostachys_edulis_newGene_52021	-2.01243	PH01005309G0070	-6.07464
PH01001805G0440	-3.81173	PH01000658G0740	-1.04982	PH01005227G0020	-1.93067
PH01000410G1060	-2.48791	Phyllostachys_edulis_newGene_72554	-1.69656	PH01000266G0820	-1.141
PH01000164G0660	-1.74907	PH01002856G0130	-1.17288	PH01000525G0610	-2.92917
PH01001153G0300	-1.68778	PH01000832G0520	-1.09075	Phyllostachys_edulis_newGene_26746	-2.5592
PH01000810G0600	-1.32747	Phyllostachys_edulis_newGene_87822	-1.25123	PH01000416G0170	-1.0578
PH01001493G0140	-1.39738	PH01005545G0080	-1.49439	PH01000086G1290	-1.21095
PH01000325G0810	-4.92515	Phyllostachys_edulis_newGene_62362	-1.01789	Phyllostachys_edulis_newGene_37358	-2.62508
PH01001339G0520	-3.29064	PH01001848G0150	-1.20178	PH01000323G0630	-3.08954
Phyllostachys_edulis_newGene_77789	-3.55248	PH01001615G0340	-1.44728	PH01001720G0330	-2.86763
PH01002473G0110	-1.84846	PH01000155G0470	-1.36299	PH01000299G1260	-2.23707
Phyllostachys_edulis_newGene_79039	-1.32648	Phyllostachys_edulis_newGene_22494	-1.37811	PH01002226G0010	-1.81918
PH01000017G0390	-1.33345	Phyllostachys_edulis_newGene_73240	-1.15001	PH01000496G0830	-1.13418
PH01001102G0260	-2.83888	PH01000500G0410	-1.00703	PH01000412G0910	-2.00195
Phyllostachys_edulis_newGene_61107	-3.09597	Phyllostachys_edulis_newGene_18543	-1.83863	PH01001618G0240	-1.12593
PH01002471G0320	-1.98919	Phyllostachys_edulis_newGene_35197	-1.58902	PH01000152G1310	-1.39446
PH01000678G0660	-4.63355	PH01002296G0200	-2.61439	PH01003454G0090	-2.86039
PH01260580G0010	-1.22034	PH01000065G0180	-1.17022	PH01000039G0530	-1.89364
PH01001596G0160	-2.34021	PH01005022G0010	-1.73536	PH01000543G0410	-2.94252
PH01001565G0340	-1.61553	PH01000461G0950	-1.05201	Phyllostachys_edulis_newGene_42181	-2.9917
PH01002883G0050	-2.75971	PH01000376G0330	-1.87999	PH01002432G0280	-3.76356
PH01002182G0340	-2.3322	Phyllostachys_edulis_newGene_81116	-1.63975	PH01001736G0250	-1.07515
PH01000562G0520	-2.229	Phyllostachys_edulis_newGene_67333	-1.03669	PH01000063G0640	-1.41411
PH01269467G0010	-3.22341	Phyllostachys_edulis_newGene_40276	-1.87039	Phyllostachys_edulis_newGene_74226	-4.85254
PH01000394G0180	-1.14723	Phyllostachys_edulis_newGene_10987	-1.07887	PH01000262G0150	-3.07085
Phyllostachys_edulis_newGene_38072	-2.84098	PH01000019G1840	-1.64985	Phyllostachys_edulis_newGene_77171	-3.38073
PH01000024G0440	-1.52534	PH01002699G0220	-2.2387	PH01000469G0510	-2.08726
PH01000312G0600	-1.37745	Phyllostachys_edulis_newGene_64016	-1.50582	PH01002348G0040	-2.20852
PH01000822G0090	-4.48151	Phyllostachys_edulis_newGene_43484	-1.87985	PH01001215G0490	-1.67368
PH01001072G0470	-2.35243	PH01001857G0080	-1.51306	Phyllostachys_edulis_newGene_39178	-2.33009
PH01000036G0320	-2.2043	PH01006526G0030	-1.35581	PH01002016G0140	-3.94418
Phyllostachys_edulis_newGene_6421	-1.5502	Phyllostachys_edulis_newGene_46953	-1.99638	PH01068356G0010	-1.52477
PH01000015G2730	-2.03961	PH01000009G2960	-1.33692	PH01000462G0820	-1.87659
PH01001109G0010	-3.75574	Phyllostachys_edulis_newGene_48871	-2.51488	PH01005185G0040	-3.89669
Phyllostachys_edulis_newGene_46562	-1.16423	PH01000204G0450	-1.22696	PH01002098G0210	-2.62695
PH01001525G0180	-1.43396	Phyllostachys_edulis_newGene_63152	-1.43893	PH01000453G0220	-3.0919
PH01000043G1290	-3.07638	PH01000724G0300	-2.67536	PH01003544G0090	-1.64905
Phyllostachys_edulis_newGene_83252	-3.73809	PH01000825G0330	-1.04854	PH01000990G0520	-2.72081
PH01000953G0530	-1.59083	Phyllostachys_edulis_newGene_38802	-1.36577	PH01000273G0520	-1.09185
PH01000084G0850	-2.7271	PH01132542G0010	-1.16604	PH01000322G0600	-1.11966
Phyllostachys_edulis_newGene_33647	-4.30126	PH01000466G0250	-2.1635	PH01001069G0410	-1.52098
PH01001876G0380	-2.18929	PH01001821G0300	-1.42883	PH01003734G0070	-1.61099
PH01000466G0920	-1.80214	PH01004767G0020	-1.42963	PH01000270G0760	-1.00866
Phyllostachys_edulis_newGene_21717	-2.551	PH01002724G0010	-1.01689	PH01001222G0410	-1.87813
PH01002426G0120	-4.02117	Phyllostachys_edulis_newGene_17366	-1.44862	PH01000439G0060	-1.36828
PH01000780G0450	-3.87805	PH01000064G1250	-1.22893	Phyllostachys_edulis_newGene_67281	-5.91682
PH01000849G0460	-4.43667	PH01001543G0150	-1.3499	PH01000369G0840	-1.26653
PH01000739G0140	-2.38189	PH01005385G0080	-1.02313	PH01000084G1370	-1.73299
PH01001328G0340	-4.39654	PH01000041G1980	-1.07536	PH01000481G0750	-1.41378
Phyllostachys_edulis_newGene_51994	-3.76206	PH01000160G0940	-1.09567	PH01000604G0710	-1.37133
PH01002063G0260	-2.89747	PH01001504G0200	-1.0756	PH01000670G0070	-3.44704
Phyllostachys_edulis_newGene_85867	-1.11197	PH01001237G0100	-1.30756	PH01000145G1350	-1.38271
PH01000226G0100	-4.59982	Phyllostachys_edulis_newGene_78313	-1.21239	PH01000524G0830	-1.40388
Phyllostachys_edulis_newGene_68204	-1.29679	Phyllostachys_edulis_newGene_67872	-1.03104	PH01000167G0880	-1.75673
Phyllostachys_edulis_newGene_79578	-2.03322	Phyllostachys_edulis_newGene_26031	-1.77749	PH01000490G0980	-3.28555
PH01000618G0370	-1.0936	Phyllostachys_edulis_newGene_63956	-1.06832	PH01001427G0390	-2.18557
Phyllostachys_edulis_newGene_82595	-1.01919	Phyllostachys_edulis_newGene_60207	-3.6297	PH01002219G0230	-2.46345
Phyllostachys_edulis_newGene_37057	-3.55616	PH01000266G1280	-1.21584	PH01000853G0290	-1.95913
PH01003223G0120	-2.48911	Phyllostachys_edulis_newGene_71957	-1.26547	PH01002831G0130	-2.44086
PH01000014G0360	-2.00488	PH01005351G0030	-2.11411	PH01003236G0060	-1.48673
PH01000974G0460	-2.16854	PH01016536G0020	-1.62238	PH01002112G0230	-2.15908
PH01000665G0740	-1.82179	PH01000028G0380	-1.33387	PH01205650G0010	-1.6677
Phyllostachys_edulis_newGene_49500	-1.95127	PH01000002G4080	-1.13294	Phyllostachys_edulis_newGene_69806	-3.12102
PH01002183G0030	-1.96586	PH01000297G0670	-2.32958	PH01000059G0360	-1.09124
PH01000291G1090	-5.24443	PH01000456G0120	-1.4762	PH01001441G0020	-1.47475
Phyllostachys_edulis_newGene_27731	-2.21594	Phyllostachys_edulis_newGene_24337	-1.96447	Phyllostachys_edulis_newGene_24468	-1.16051
Phyllostachys_edulis_newGene_59114	-2.1666	Phyllostachys_edulis_newGene_32860	-1.12759	PH01001507G0510	-1.35069
Phyllostachys_edulis_newGene_31272	-2.97871	PH01000182G0920	-1.30599	PH01001233G0420	-3.2794
PH01001527G0020	-2.64437	Phyllostachys_edulis_newGene_82948	-1.40766	PH01005716G0070	-2.9181
Phyllostachys_edulis_newGene_80253	-2.59495	PH01000057G0110	-1.90049	PH01000000G0330	-2.65387
Phyllostachys_edulis_newGene_54937	-1.23259	PH01002031G0230	-1.69352	Phyllostachys_edulis_newGene_30319	-1.90382
PH01002434G0010	-3.66868	PH01000592G0720	-1.0196	PH01000363G0160	-2.63855
PH01001006G0420	-1.97258	PH01003372G0140	-1.49031	PH01000265G0860	-2.88499
PH01000323G0330	-1.26878	PH01002925G0170	-1.45298	Phyllostachys_edulis_newGene_52651	-5.70286
PH01000558G0900	-3.91621	PH01000001G3620	-2.03687	PH01002139G0190	-2.62137
Phyllostachys_edulis_newGene_26797	-1.73344	Phyllostachys_edulis_newGene_9664	-1.48228	Phyllostachys_edulis_newGene_69898	-2.12471
Phyllostachys_edulis_newGene_6219	-3.15979	Phyllostachys_edulis_newGene_87528	-1.38747	Phyllostachys_edulis_newGene_87909	-1.78494
Phyllostachys_edulis_newGene_23343	-2.54384	Phyllostachys_edulis_newGene_59568	-1.38579	PH01052525G0010	-1.9242
PH01000532G0950	-2.96995	PH01000417G0610	-1.47303	PH01000904G0010	-4.04988
PH01000230G0880	-3.19596	Phyllostachys_edulis_newGene_50862	-2.3454	Phyllostachys_edulis_newGene_60063	-1.58504
PH01000686G0340	-6.48264	Phyllostachys_edulis_newGene_32312	-1.28208	Phyllostachys_edulis_newGene_793	-1.70186
PH01005032G0040	-2.57465	PH01269761G0010	-1.76478	PH01000527G0530	-2.95957
PH01000702G0290	-4.16357	PH01004060G0130	-1.27174	PH01001055G0320	-1.27443
PH01002775G0150	-3.26183	PH01078251G0010	-1.59646	PH01000015G2370	-2.8994
Phyllostachys_edulis_newGene_54786	-2.04998	PH01001261G0230	-1.67741	Phyllostachys_edulis_newGene_67116	-1.36296
PH01004308G0070	-1.50169	PH01000294G0540	-1.54128	PH01000235G0100	-1.94453
Phyllostachys_edulis_newGene_30246	-1.86893	PH01000056G0470	-1.46091	PH01000357G0760	-2.83533
PH01000427G0500	-3.05063	PH01000134G0740	-1.58754	PH01001474G0260	-1.69013
PH01002204G0210	-2.1259	Phyllostachys_edulis_newGene_53889	-2.18862	PH01003664G0110	-1.209
PH01000370G0110	-3.9719	PH01000604G0180	-1.27305	Phyllostachys_edulis_newGene_74778	-2.32186
PH01000192G0600	-1.63433	Phyllostachys_edulis_newGene_29579	-1.53253	Phyllostachys_edulis_newGene_40858	-2.38148
PH01002177G0070	-3.74109	PH01003770G0040	-1.00107	Phyllostachys_edulis_newGene_79050	-1.12141
PH01002771G0320	-2.77373	PH01000119G0780	-1.70958	Phyllostachys_edulis_newGene_77730	-3.13698
PH01000140G0280	-1.77663	Phyllostachys_edulis_newGene_678	-1.23803	PH01000407G0140	-2.81162
PH01019809G0010	-2.02536	Phyllostachys_edulis_newGene_17754	-1.22072	PH01001175G0060	-1.49861
PH01004403G0060	-3.26752	Phyllostachys_edulis_newGene_47717	-1.07662	Phyllostachys_edulis_newGene_58073	-1.51635
Phyllostachys_edulis_newGene_39411	-1.2103	Phyllostachys_edulis_newGene_62613	-2.5153	Phyllostachys_edulis_newGene_54407	-3.05698
PH01001767G0300	-2.14253	PH01001930G0220	-2.30575	PH01001259G0450	-2.24397
PH01002028G0330	-1.38156	PH01019809G0010	-4.82217	Phyllostachys_edulis_newGene_52790	-2.77408
PH01001246G0030	-1.04165	Phyllostachys_edulis_newGene_47065	-1.1416	PH01000458G0270	-2.45749
Phyllostachys_edulis_newGene_82079	-1.08145	PH01002002G0100	-2.21082	PH01000032G0410	-1.99892
PH01000974G0590	-3.77441	PH01000429G0620	-1.06479	PH01002838G0070	-1.3705
PH01006934G0040	-3.07855	PH01005863G0020	-2.23617	PH01000114G1400	-4.1002
PH01000964G0510	-2.05277	PH01002297G0300	-2.24955	Phyllostachys_edulis_newGene_36109	-2.63905
PH01046751G0010	-3.5245	Phyllostachys_edulis_newGene_50694	-1.4759	PH01000206G0500	-1.37902
Phyllostachys_edulis_newGene_83743	-1.45449	PH01000675G0120	-1.75471	Phyllostachys_edulis_newGene_73338	-3.16018
PH01001091G0170	-3.5164	PH01000125G1160	-1.44421	PH01002174G0080	-2.3129
PH01000680G0680	-1.54889	PH01002221G0180	-2.25311	PH01000006G3520	-2.43187
PH01000046G0020	-1.55073	PH01000254G0370	-1.11427	PH01000478G0610	-1.7696
Phyllostachys_edulis_newGene_84788	-3.73926	PH01002313G0050	-1.46043	PH01003162G0250	-3.09493
PH01001216G0290	-4.00086	PH01000970G0380	-1.2059	PH01002229G0040	-1.06341
Phyllostachys_edulis_newGene_81675	-1.25611	Phyllostachys_edulis_newGene_31310	-1.39624	PH01000317G0890	-1.22739
PH01001090G0120	-2.46652	PH01000986G0100	-1.01228	Phyllostachys_edulis_newGene_36740	-3.37241
PH01000064G1550	-3.98663	PH01005129G0100	-1.03084	PH01000053G0650	-2.18602
PH01001514G0210	-1.44552	PH01000433G0680	-1.79698	PH01001090G0500	-1.38345
PH01001852G0140	-1.38266	PH01000094G0910	-2.78981	PH01001227G0510	-2.15765
Phyllostachys_edulis_newGene_56268	-1.42971	Phyllostachys_edulis_newGene_67844	-1.72918	PH01001197G0410	-2.37349
PH01000783G0270	-1.35132	PH01000276G1340	-1.03793	Phyllostachys_edulis_newGene_30187	-3.80165
PH01000260G1020	-1.91539	PH01000320G0990	-1.13309	PH01005258G0010	-1.7473
Phyllostachys_edulis_newGene_27555	-2.24616	PH01000679G0200	-1.18051	PH01003970G0090	-3.23471
PH01000349G0130	-5.60213	Phyllostachys_edulis_newGene_51145	-1.28981	PH01000672G0020	-1.81045
Phyllostachys_edulis_newGene_64388	-3.9603	PH01005185G0040	-1.47415	PH01002417G0300	-3.98344
PH01000944G0100	-2.32583	PH01001876G0350	-1.4143	PH01004610G0150	-2.41219
Phyllostachys_edulis_newGene_55788	-2.0714	Phyllostachys_edulis_newGene_34878	-2.56217	Phyllostachys_edulis_newGene_61749	-3.45932
PH01003006G0150	-3.49374	PH01005657G0050	-1.0916	Phyllostachys_edulis_newGene_69543	-1.30361
Phyllostachys_edulis_newGene_32057	-3.38639	PH01000276G0060	-2.36556	PH01001158G0360	-1.47022
PH01000055G1400	-3.47498	PH01003499G0050	-1.35124	PH01000459G0010	-1.75179
Phyllostachys_edulis_newGene_24430	-2.77144	PH01000000G7400	-2.1447	PH01004825G0030	-2.87157
PH01040648G0010	-3.82905	Phyllostachys_edulis_newGene_34320	-1.68111	PH01000654G0490	-1.09137
Phyllostachys_edulis_newGene_33605	-1.29859	PH01000657G0120	-1.21967	PH01002515G0010	-2.28656
PH01002061G0210	-2.89742	PH01002938G0200	-1.00464	PH01002305G0030	-2.6656
PH01003937G0060	-4.6344	PH01000471G0210	-1.20787	Phyllostachys_edulis_newGene_3238	-3.2497
Phyllostachys_edulis_newGene_72142	-2.73011	PH01000520G0560	-1.27368	Phyllostachys_edulis_newGene_34925	-3.41887
PH01000926G0380	-2.74325	PH01002924G0170	-2.49459	Phyllostachys_edulis_newGene_106	-2.36353
PH01260225G0010	-3.3165	Phyllostachys_edulis_newGene_50958	-1.19242	PH01001995G0150	-1.57522
Phyllostachys_edulis_newGene_43232	-1.12994	PH01003491G0150	-1.60243	Phyllostachys_edulis_newGene_49954	-2.43098
PH01002277G0170	-2.2174	PH01000478G0330	-1.97681	PH01000944G0250	-3.98939
PH01007072G0010	-1.96186	PH01000068G1560	-2.50135	PH01002033G0150	-1.33862
PH01001291G0230	-1.57571	PH01000766G0300	-1.51553	Phyllostachys_edulis_newGene_54726	-1.98492
PH01001470G0150	-2.56439	Phyllostachys_edulis_newGene_70769	-1.5422	PH01005166G0070	-1.43337
Phyllostachys_edulis_newGene_27902	-1.22577	PH01001292G0230	-1.29363	Phyllostachys_edulis_newGene_35049	-4.75678
Phyllostachys_edulis_newGene_76358	-1.85701	PH01001858G0020	-1.22286	Phyllostachys_edulis_newGene_3237	-1.99486
PH01001410G0460	-2.57914	PH01004295G0090	-2.10322	PH01001897G0350	-2.00694
PH01002790G0290	-3.25061	PH01001226G0340	-1.14153	PH01000003G1680	-2.94784
Phyllostachys_edulis_newGene_64486	-1.68022	PH01000425G0390	-1.31487	PH01002669G0370	-1.52581
PH01000301G0070	-2.17625	PH01002178G0200	-1.89357	PH01000541G0630	-1.57439
PH01000714G0020	-4.53439	Phyllostachys_edulis_newGene_88046	-1.11479	PH01001125G0270	-1.66674
PH01000197G0470	-2.96542	Phyllostachys_edulis_newGene_82099	-1.92834	PH01000653G0790	-1.13726
PH01000277G0400	-2.74764	PH01002488G0240	-2.20093	PH01000602G0790	-1.42211
PH01001271G0480	-2.42149	PH01002153G0330	-1.11306	PH01001637G0470	-2.0328
PH01002524G0200	-2.37181	PH01001898G0100	-1.03165	PH01002460G0150	-1.73164
PH01000229G1390	-2.98535	PH01002642G0010	-1.94707	Phyllostachys_edulis_newGene_19284	-4.37224
PH01001678G0320	-1.78612	PH01002958G0060	-3.42063	PH01000123G1510	-2.96785
PH01002892G0220	-2.98493	Phyllostachys_edulis_newGene_51702	-1.09084	PH01002299G0310	-1.0985
PH01000258G1040	-4.42462	PH01001633G0030	-1.72005	PH01000321G0390	-1.48497
Phyllostachys_edulis_newGene_45629	-1.47419	Phyllostachys_edulis_newGene_82052	-1.99096	PH01003768G0060	-1.06293
PH01000799G0530	-2.77589	PH01000099G0950	-1.18107	PH01001693G0110	-2.57873
Phyllostachys_edulis_newGene_61440	-2.09474	Phyllostachys_edulis_newGene_72289	-5.6278	PH01000347G1160	-2.90971
PH01000333G0270	-2.90846	PH01001038G0160	-1.01751	Phyllostachys_edulis_newGene_51682	-2.62927
Phyllostachys_edulis_newGene_10797	-3.16712	PH01000033G1800	-1.12718	PH01002371G0230	-2.05852
PH01001815G0110	-1.71157	Phyllostachys_edulis_newGene_78787	-1.83484	Phyllostachys_edulis_newGene_53687	-2.61049
PH01000433G0890	-1.5318	Phyllostachys_edulis_newGene_55473	-2.38384	PH01000014G1430	-2.32848
PH01000010G2770	-3.56023	PH01000270G0090	-1.43961	PH01000009G1800	-2.70881
PH01000106G1400	-2.7299	Phyllostachys_edulis_newGene_45422	-1.4524	Phyllostachys_edulis_newGene_53855	-2.06921
Phyllostachys_edulis_newGene_64854	-1.94945	PH01000649G0590	-1.53312	PH01000145G1320	-2.62969
Phyllostachys_edulis_newGene_47457	-2.25724	PH01002448G0200	-1.71365	PH01000018G2550	-1.37478
PH01000342G0690	-3.3922	PH01001268G0330	-2.17367	PH01002403G0050	-2.96429
PH01000062G1410	-2.96656	PH01000308G0520	-1.10022	Phyllostachys_edulis_newGene_32159	-1.54257
PH01000003G3180	-1.36848	PH01000516G0090	-1.06186	Phyllostachys_edulis_newGene_54921	-2.31051
PH01000576G0710	-3.49853	Phyllostachys_edulis_newGene_25843	-1.57963	PH01001567G0120	-1.48385
Phyllostachys_edulis_newGene_44566	-2.64146	Phyllostachys_edulis_newGene_40435	-1.19619	PH01000405G0290	-3.37276
PH01000015G0090	-4.07158	PH01083471G0010	-1.1695	Phyllostachys_edulis_newGene_44228	-1.88037
PH01000391G0450	-1.97942	Phyllostachys_edulis_newGene_48387	-1.70789	Phyllostachys_edulis_newGene_57245	-2.12285
PH01002892G0120	-3.8454	PH01000413G0700	-1.3072	PH01001028G0610	-1.51146
PH01001226G0630	-2.31373	Phyllostachys_edulis_newGene_37926	-1.65441	Phyllostachys_edulis_newGene_62389	-2.39256
Phyllostachys_edulis_newGene_80133	-3.1815	PH01005515G0070	-1.49728	PH01000113G0080	-1.19769
PH01000001G2010	-2.43812	PH01000936G0050	-1.26883	PH01000187G1290	-2.13279
PH01000032G1740	-1.84947	Phyllostachys_edulis_newGene_60120	-1.59861	PH01002049G0090	-1.29595
PH01002433G0160	-3.71321	Phyllostachys_edulis_newGene_53921	-1.02778	PH01002312G0230	-1.71022
PH01000117G0520	-1.17564	PH01000524G0660	-1.97979	PH01003704G0180	-1.68658
PH01000972G0490	-2.84661	PH01001500G0090	-1.48377	PH01000784G0170	-1.35501
Phyllostachys_edulis_newGene_35003	-5.78867	PH01001695G0020	-2.02736	PH01000920G0080	-1.63157
PH01000409G0370	-1.44257	Phyllostachys_edulis_newGene_80677	-1.70974	PH01000290G0250	-4.06827
Phyllostachys_edulis_newGene_43958	-1.32893	PH01000442G0540	-1.065	PH01000001G2870	-2.23075
Phyllostachys_edulis_newGene_18556	-1.24267	PH01002942G0130	-1.08251	PH01000426G0830	-2.09987
Phyllostachys_edulis_newGene_56952	-2.43339	Phyllostachys_edulis_newGene_45516	-2.30366	PH01000540G0410	-4.04241
Phyllostachys_edulis_newGene_57267	-4.3553	PH01004640G0030	-1.47159	PH01001690G0200	-1.82127
Phyllostachys_edulis_newGene_24126	-1.67781	PH01002753G0070	-1.58543	PH01000666G0820	-2.58888
PH01000718G0720	-2.92641	Phyllostachys_edulis_newGene_34929	-2.14974	PH01001950G0080	-1.09591
PH01000585G0760	-2.23452	Phyllostachys_edulis_newGene_15064	-1.97049	Phyllostachys_edulis_newGene_57872	-1.57667
Phyllostachys_edulis_newGene_47856	-2.66928	PH01000849G0330	-1.03983	PH01002297G0300	-2.89057
Phyllostachys_edulis_newGene_38316	-1.39322	Phyllostachys_edulis_newGene_58125	-1.17522	PH01001294G0150	-2.22198
PH01003159G0030	-2.60914	PH01000062G1100	-1.30311	PH01000511G0920	-1.29687
Phyllostachys_edulis_newGene_29931	-2.66185	PH01000122G0930	-2.90073	PH01001206G0080	-1.63811
PH01001120G0310	-2.90369	Phyllostachys_edulis_newGene_47111	-1.82105	PH01000901G0320	-1.28437
PH01000191G0360	-3.42608	PH01002921G0250	-1.03007	PH01000910G0450	-2.73747
Phyllostachys_edulis_newGene_77137	-2.3031	PH01000158G0650	-1.00294	PH01000135G0070	-1.47102
Phyllostachys_edulis_newGene_82411	-2.3668	PH01035278G0010	-1.77797	PH01001267G0140	-2.23832
PH01027350G0010	-2.76572	PH01001031G0590	-1.17185	Phyllostachys_edulis_newGene_37994	-2.18917
PH01221989G0010	-1.49855	Phyllostachys_edulis_newGene_61452	-1.42611	PH01000654G0030	-2.2505
Phyllostachys_edulis_newGene_75679	-1.07323	PH01001003G0740	-1.48538	PH01002841G0200	-1.35834
PH01000083G0330	-2.86877	PH01000049G1950	-1.30184	PH01001941G0050	-2.35376
PH01000117G1050	-2.04469	PH01001552G0080	-1.28949	PH01000308G0710	-2.22663
PH01235299G0010	-1.78861	PH01002328G0180	-1.80309	PH01001506G0280	-2.96428
PH01000373G0550	-6.45748	PH01001467G0360	-1.03978	PH01000690G0040	-1.96765
Phyllostachys_edulis_newGene_31423	-3.32984	Phyllostachys_edulis_newGene_49212	-2.17781	PH01006040G0070	-1.43028
Phyllostachys_edulis_newGene_69632	-2.46847	Phyllostachys_edulis_newGene_80108	-2.61226	PH01003299G0050	-1.364
Phyllostachys_edulis_newGene_59118	-1.21334	PH01000696G0700	-2.30267	Phyllostachys_edulis_newGene_41163	-2.04049
Phyllostachys_edulis_newGene_37142	-2.04121	Phyllostachys_edulis_newGene_60825	-1.35142	Phyllostachys_edulis_newGene_26993	-1.0075
PH01001233G0460	-1.07995	PH01001616G0240	-1.27397	Phyllostachys_edulis_newGene_46163	-2.3831
Phyllostachys_edulis_newGene_33952	-1.57428	Phyllostachys_edulis_newGene_5730	-1.27809	Phyllostachys_edulis_newGene_29385	-1.44816
PH01000000G0710	-1.27189	PH01002185G0050	-1.98626	PH01000256G0290	-1.45468
PH01001393G0310	-1.51616	PH01000192G1330	-1.09916	PH01001848G0150	-4.61293
PH01001101G0220	-3.60371	Phyllostachys_edulis_newGene_35783	-1.1572	Phyllostachys_edulis_newGene_49494	-1.90475
Phyllostachys_edulis_newGene_82264	-1.0017	PH01000018G1710	-1.05623	PH01000705G0720	-1.04242
PH01000023G1230	-2.70011	Phyllostachys_edulis_newGene_81339	-1.34258	PH01000832G0600	-3.7854
PH01000000G6460	-2.3007	PH01000119G0070	-1.66357	Phyllostachys_edulis_newGene_63770	-2.33747
PH01000408G0110	-2.02264	Phyllostachys_edulis_newGene_85813	-1.27021	PH01001536G0220	-2.796
Phyllostachys_edulis_newGene_27596	-4.09734	Phyllostachys_edulis_newGene_44019	-1.21748	PH01001333G0220	-1.91037
PH01002523G0030	-1.07866	PH01000949G0380	-1.04419	PH01000120G0740	-1.36714
PH01002016G0160	-2.69765	PH01000200G0790	-1.26399	PH01000009G2460	-1.61645
PH01000290G0170	-4.15125	PH01002349G0160	-1.94028	PH01002373G0130	-1.22068
Phyllostachys_edulis_newGene_21414	-1.83231	PH01000848G0240	-1.33895	PH01000014G0030	-2.42182
PH01000852G0260	-1.40472	Phyllostachys_edulis_newGene_25675	-1.47326	Phyllostachys_edulis_newGene_51145	-2.44349
Phyllostachys_edulis_newGene_25571	-3.30726	PH01000401G0650	-1.26654	PH01051629G0010	-1.70492
Phyllostachys_edulis_newGene_42883	-1.40666	PH01000642G0240	-1.5029	PH01000402G0350	-1.46192
PH01001789G0250	-2.01664	PH01004287G0060	-1.28147	PH01000078G1740	-1.28682
PH01001131G0190	-2.36816	PH01001357G0070	-1.32687	PH01002245G0230	-1.69553
PH01000026G2010	-3.41233	PH01001942G0250	-1.76995	Phyllostachys_edulis_newGene_27161	-2.65144
PH01000173G1130	-2.61139	PH01000068G0590	-1.13175	Phyllostachys_edulis_newGene_76538	-2.27582
PH01003039G0130	-2.64988	PH01000429G0730	-1.33443	PH01001902G0010	-2.01631
PH01000694G0750	-2.66807	PH01000407G0060	-1.29882	Phyllostachys_edulis_newGene_81116	-3.23242
PH01000882G0090	-3.68898	Phyllostachys_edulis_newGene_88	-1.25276	PH01000030G2230	-3.58272
PH01001725G0150	-2.78765	Phyllostachys_edulis_newGene_66596	-1.25439	PH01000705G0460	-2.33804
PH01002857G0060	-1.85261	PH01000233G1000	-2.74159	PH01000322G0140	-3.06809
Phyllostachys_edulis_newGene_40202	-2.65833	Phyllostachys_edulis_newGene_81966	-1.16819	PH01000003G0860	-3.70494
PH01002823G0050	-2.57371	PH01004049G0170	-1.87098	PH01000219G0690	-1.98376
PH01000970G0380	-2.27534	PH01000680G0690	-1.08993	PH01000494G0450	-3.58253
Phyllostachys_edulis_newGene_49949	-3.19165	PH01002645G0080	-1.35192	Phyllostachys_edulis_newGene_27922	-2.575
PH01002433G0310	-1.53332	Phyllostachys_edulis_newGene_52647	-1.09585	PH01001324G0110	-4.30616
PH01001930G0060	-2.68259	Phyllostachys_edulis_newGene_34031	-1.34216	Phyllostachys_edulis_newGene_23728	-3.89099
PH01000299G0560	-2.9333	PH01000813G0530	-1.60096	PH01000119G0710	-1.1313
PH01000336G0560	-1.6329	PH01001088G0220	-1.14358	PH01000083G1500	-3.01651
PH01000042G1220	-4.79452	Phyllostachys_edulis_newGene_13233	-1.47724	PH01003660G0030	-1.7453
PH01001557G0090	-3.65587	PH01001056G0690	-1.8553	Phyllostachys_edulis_newGene_36019	-1.71348
Phyllostachys_edulis_newGene_74093	-2.07826	Phyllostachys_edulis_newGene_45355	-1.71704	PH01006766G0010	-1.12704
Phyllostachys_edulis_newGene_58210	-5.4008	PH01000887G0630	-1.02202	Phyllostachys_edulis_newGene_29618	-3.55793
PH01001028G0120	-2.63312	PH01015639G0010	-2.52408	PH01000153G0430	-2.84348
PH01000366G0610	-3.22793	Phyllostachys_edulis_newGene_62589	-1.04044	Phyllostachys_edulis_newGene_83411	-1.75777
PH01000002G2500	-4.65039	PH01000170G0510	-1.01562	PH01001832G0330	-2.45353
PH01001401G0380	-5.38887	PH01000254G1090	-1.52453	PH01000111G1510	-1.8388
PH01001770G0220	-1.62872	Phyllostachys_edulis_newGene_526	-1.03412	Phyllostachys_edulis_newGene_30351	-1.15652
PH01001055G0310	-2.79356	Phyllostachys_edulis_newGene_66366	-2.50853	PH01000985G0450	-2.91933
PH01000241G0070	-2.91234	PH01001280G0420	-2.91553	PH01000972G0120	-2.81594
Phyllostachys_edulis_newGene_73340	-2.19778	PH01000500G0260	-1.37425	Phyllostachys_edulis_newGene_49987	-3.0657
PH01001724G0410	-2.22762	PH01000020G2310	-1.28898	Phyllostachys_edulis_newGene_41644	-1.29297
Phyllostachys_edulis_newGene_60698	-1.62898	Phyllostachys_edulis_newGene_31312	-1.22238	Phyllostachys_edulis_newGene_63259	-1.01401
Phyllostachys_edulis_newGene_44805	-3.09112	PH01000360G1130	-2.48255	PH01000002G2740	-1.3661
PH01001484G0310	-1.61096	PH01000259G1230	-1.1041	PH01000668G0290	-3.24304
Phyllostachys_edulis_newGene_69226	-2.32967	Phyllostachys_edulis_newGene_64028	-1.67298	PH01000321G1030	-2.86793
Phyllostachys_edulis_newGene_60373	-3.42566	PH01000143G1570	-1.53234	PH01000494G0890	-1.80171
PH01000020G0790	-2.99903	PH01003264G0010	-1.50714	PH01002351G0200	-1.67249
PH01000391G0650	-3.42835	Phyllostachys_edulis_newGene_77140	-1.02351	PH01006035G0050	-3.08953
Phyllostachys_edulis_newGene_30688	-3.1826	PH01000025G1940	-1.254	PH01001942G0250	-1.87478
Phyllostachys_edulis_newGene_33491	-2.09158	PH01000525G0810	-2.18183	Phyllostachys_edulis_newGene_50195	-3.90297
PH01000201G0980	-1.23146	PH01001751G0380	-1.1463	Phyllostachys_edulis_newGene_32969	-2.55855
Phyllostachys_edulis_newGene_64350	-1.48997	Phyllostachys_edulis_newGene_74224	-1.03873	Phyllostachys_edulis_newGene_66343	-3.1092
Phyllostachys_edulis_newGene_39223	-1.77397	PH01002089G0140	-1.00033	PH01005664G0110	-2.23988
PH01000436G0130	-2.04684	PH01000402G0910	-1.41046	PH01000054G2420	-2.54258
Phyllostachys_edulis_newGene_71976	-2.43991	Phyllostachys_edulis_newGene_9385	-1.35407	Phyllostachys_edulis_newGene_57734	-1.31195
PH01000243G0350	-3.48595	Phyllostachys_edulis_newGene_57049	-1.43526	Phyllostachys_edulis_newGene_86306	-3.70767
PH01004851G0060	-2.78395	PH01001558G0210	-1.60559	PH01000186G1170	-1.20694
Phyllostachys_edulis_newGene_31516	-1.04589	Phyllostachys_edulis_newGene_39362	-1.02356	PH01002974G0110	-2.33429
Phyllostachys_edulis_newGene_22915	-1.53551	Phyllostachys_edulis_newGene_65568	-2.35373	PH01001929G0130	-2.41034
PH01000000G0290	-1.35741	PH01002518G0240	-1.87833	Phyllostachys_edulis_newGene_29555	-2.28921
PH01000961G0430	-1.548	Phyllostachys_edulis_newGene_64416	-1.35658	Phyllostachys_edulis_newGene_82349	-1.28451
PH01000006G2370	-1.98766	Phyllostachys_edulis_newGene_18112	-1.02374	PH01000152G1100	-1.60684
PH01191810G0010	-1.40871	Phyllostachys_edulis_newGene_37811	-2.28849	PH01000450G0210	-2.08335
PH01000309G1270	-2.07615	Phyllostachys_edulis_newGene_70407	-1.60159	PH01000015G2440	-3.51156
PH01002425G0170	-2.69044	PH01000045G1370	-1.21194	Phyllostachys_edulis_newGene_31387	-3.74819
PH01003177G0200	-2.52113	PH01000033G1700	-1.39328	Phyllostachys_edulis_newGene_63304	-3.65168
PH01239508G0010	-1.64368	Phyllostachys_edulis_newGene_9961	-2.12356	PH01005129G0110	-2.02133
PH01001967G0220	-3.72356	PH01002133G0180	-2.18745	Phyllostachys_edulis_newGene_44753	-4.13477
Phyllostachys_edulis_newGene_55078	-1.68294	PH01001281G0250	-1.35728	Phyllostachys_edulis_newGene_60474	-1.29124
PH01001407G0460	-2.7987	PH01001117G0020	-1.3752	PH01000535G0750	-1.21872
Phyllostachys_edulis_newGene_50862	-1.87614	Phyllostachys_edulis_newGene_71164	-1.44138	Phyllostachys_edulis_newGene_69053	-4.3872
Phyllostachys_edulis_newGene_86792	-2.37211	PH01002036G0010	-1.31973	PH01000204G0350	-2.17359
Phyllostachys_edulis_newGene_31673	-4.33105	PH01000054G1710	-2.11942	Phyllostachys_edulis_newGene_61083	-2.75432
PH01004227G0070	-1.88882	PH01028464G0010	-1.90642	PH01000740G0600	-1.83494
PH01000432G0810	-1.18344	Phyllostachys_edulis_newGene_15861	-1.64214	PH01003382G0190	-2.81599
Phyllostachys_edulis_newGene_60973	-1.35489	PH01001422G0270	-1.016	PH01001178G0490	-1.72888
PH01035278G0010	-4.01153	Phyllostachys_edulis_newGene_82209	-1.23668	PH01002934G0080	-1.66765
PH01003073G0070	-1.16793	Phyllostachys_edulis_newGene_21877	-2.43167	Phyllostachys_edulis_newGene_35463	-1.2569
Phyllostachys_edulis_newGene_53803	-2.53554	Phyllostachys_edulis_newGene_61285	-1.49811	Phyllostachys_edulis_newGene_80900	-1.453
PH01001564G0210	-3.27384	PH01001832G0040	-1.01603	Phyllostachys_edulis_newGene_13394	-3.27692
PH01001527G0140	-1.79195	PH01000145G0500	-1.27052	PH01000802G0150	-3.80678
Phyllostachys_edulis_newGene_28965	-3.59048	PH01092931G0010	-1.74977	Phyllostachys_edulis_newGene_82375	-5.68038
PH01000978G0630	-4.75847	PH01001880G0400	-1.02115	PH01001784G0050	-2.86489
PH01000080G1620	-1.82619	PH01168752G0010	-2.58136	PH01000056G0770	-2.1986
PH01000613G0090	-2.2874	Phyllostachys_edulis_newGene_39359	-1.41409	PH01001606G0180	-1.86541
PH01002460G0210	-2.65457	PH01000428G0730	-1.06504	Phyllostachys_edulis_newGene_65238	-3.23969
PH01001057G0030	-4.58155	Phyllostachys_edulis_newGene_80293	-1.23897	PH01001215G0410	-2.17364
PH01001929G0330	-4.19936	PH01000040G2000	-1.67604	PH01000051G1170	-1.09759
PH01003394G0080	-1.40983	Phyllostachys_edulis_newGene_2334	-1.58076	Phyllostachys_edulis_newGene_25459	-3.66378
PH01000437G0990	-5.49451	PH01001853G0340	-1.55852	Phyllostachys_edulis_newGene_36437	-1.73493
PH01001542G0400	-1.47437	Phyllostachys_edulis_newGene_84892	-1.45377	Phyllostachys_edulis_newGene_59665	-2.75056
PH01000790G0120	-4.08281	PH01000026G0420	-1.35937	PH01000279G0830	-2.04471
Phyllostachys_edulis_newGene_2993	-1.23863	PH01003373G0170	-1.60527	Phyllostachys_edulis_newGene_28464	-1.7183
PH01000025G1450	-3.52337	Phyllostachys_edulis_newGene_34104	-2.91503	PH01000710G0110	-2.93067
Phyllostachys_edulis_newGene_84631	-2.5484	PH01002076G0030	-2.91181	PH01000280G1190	-1.41882
PH01000935G0280	-1.84811	Phyllostachys_edulis_newGene_82412	-1.16767	PH01003928G0030	-2.52315
PH01000012G1560	-2.31722	Phyllostachys_edulis_newGene_78856	-1.6181	PH01004035G0040	-1.56088
PH01001262G0550	-2.86537	PH01000432G0850	-1.23963	PH01000014G0090	-3.21344
PH01001117G0550	-3.03747	PH01000020G1370	-1.22955	PH01000118G0760	-2.33117
PH01001155G0390	-3.18797	PH01002224G0390	-2.778	PH01000025G1920	-1.23905
PH01005293G0040	-1.53064	PH01000140G0150	-1.18597	PH01000387G0600	-1.65545
Phyllostachys_edulis_newGene_45006	-1.36719	Phyllostachys_edulis_newGene_39806	-1.98072	PH01000382G0430	-1.04543
PH01000498G0100	-2.91481	Phyllostachys_edulis_newGene_24225	-1.29748	PH01000047G2010	-1.24045
Phyllostachys_edulis_newGene_46008	-2.78565	PH01001939G0160	-1.95412	Phyllostachys_edulis_newGene_39176	-1.74796
Phyllostachys_edulis_newGene_41800	-1.13439	Phyllostachys_edulis_newGene_52997	-1.30377	Phyllostachys_edulis_newGene_81654	-3.33682
PH01001055G0590	-2.25685	Phyllostachys_edulis_newGene_53381	-1.85768	PH01002057G0320	-3.02455
PH01007660G0010	-1.58976	PH01002765G0010	-1.28647	Phyllostachys_edulis_newGene_28778	-3.09478
Phyllostachys_edulis_newGene_31758	-2.02763	Phyllostachys_edulis_newGene_73242	-1.8306	Phyllostachys_edulis_newGene_72421	-3.13426
PH01000578G0550	-2.78942	PH01001230G0380	-1.38508	PH01000355G0940	-1.46525
Phyllostachys_edulis_newGene_48786	-2.404	Phyllostachys_edulis_newGene_68857	-1.47804	PH01001360G0070	-1.89777
PH01001425G0150	-2.46014	PH01005988G0020	-1.07456	PH01000210G0210	-1.04891
Phyllostachys_edulis_newGene_72013	-1.57245	Phyllostachys_edulis_newGene_82485	-1.03271	PH01001773G0180	-2.33516
PH01002639G0010	-2.71141	Phyllostachys_edulis_newGene_30055	-1.84473	PH01000828G0500	-1.13724
Phyllostachys_edulis_newGene_61223	-1.76175	PH01000087G0200	-1.14073	Phyllostachys_edulis_newGene_38753	-1.39159
PH01000313G0530	-1.94079	PH01000560G0030	-1.11351	PH01000926G0020	-1.66534
Phyllostachys_edulis_newGene_29214	-5.15321	PH01000043G0210	-1.58438	PH01000901G0600	-1.43539
Phyllostachys_edulis_newGene_12701	-1.33688	Phyllostachys_edulis_newGene_65131	-5.0643	PH01000532G0650	-3.87485
Phyllostachys_edulis_newGene_212	-4.30641	PH01001737G0070	-1.60187	Phyllostachys_edulis_newGene_85508	-3.23537
Phyllostachys_edulis_newGene_72923	-3.05839	Phyllostachys_edulis_newGene_11645	-1.67389	PH01068923G0010	-2.35181
PH01000032G1640	-1.25681	PH01088680G0010	-1.08048	PH01001305G0100	-1.72273
PH01001646G0080	-2.61265	Phyllostachys_edulis_newGene_64536	-1.12058	PH01000182G0560	-1.01068
PH01005347G0090	-3.08631	Phyllostachys_edulis_newGene_56745	-1.04821	PH01000125G0830	-1.11316
PH01005572G0080	-1.54424	PH01000680G0220	-1.19305	Phyllostachys_edulis_newGene_70027	-5.65067
Phyllostachys_edulis_newGene_61903	-2.00571	Phyllostachys_edulis_newGene_67906	-1.8579	PH01000520G0460	-2.00302
PH01001543G0150	-1.29079	PH01000870G0470	-1.60057	Phyllostachys_edulis_newGene_55995	-2.86813
PH01001370G0350	-1.03533	Phyllostachys_edulis_newGene_81143	-1.65264	PH01001629G0390	-1.43509
PH01000928G0510	-1.52753	Phyllostachys_edulis_newGene_38316	-1.14732	PH01000076G1790	-2.92661
PH01265216G0010	-3.60965	Phyllostachys_edulis_newGene_35074	-1.83786	PH01001629G0400	-2.45135
PH01001108G0340	-2.38073	Phyllostachys_edulis_newGene_57780	-1.00812	PH01252181G0010	-3.11513
PH01000058G1580	-1.41539	Phyllostachys_edulis_newGene_37152	-2.05883	PH01000281G1010	-1.91256
PH01000209G0220	-3.11799	PH01001313G0070	-1.16768	PH01000900G0580	-1.68485
PH01000412G0060	-2.79701	PH01000077G0260	-1.49556	PH01000133G0930	-2.0517
PH01000468G0840	-1.47988	PH01000085G1330	-1.46524	PH01000701G0250	-6.49441
PH01003128G0230	-2.92345	PH01000164G0630	-1.06405	Phyllostachys_edulis_newGene_76496	-1.29725
PH01002683G0240	-2.11868	Phyllostachys_edulis_newGene_77143	-1.24364	PH01000459G0550	-1.08894
Phyllostachys_edulis_newGene_50210	-4.65333	PH01000078G0450	-1.23081	Phyllostachys_edulis_newGene_76894	-1.00561
Phyllostachys_edulis_newGene_18567	-1.36515	Phyllostachys_edulis_newGene_65465	-1.29661	Phyllostachys_edulis_newGene_81634	-3.07316
PH01001622G0070	-2.54414	PH01000872G0030	-1.16451	PH01000075G0720	-1.29018
PH01001081G0390	-2.71295	Phyllostachys_edulis_newGene_81599	-1.77816	PH01003155G0210	-2.02565
PH01000328G0180	-1.38928	PH01000243G0810	-2.27969	PH01001968G0060	-2.01273
PH01000085G0730	-2.35636	Phyllostachys_edulis_newGene_23772	-1.0781	PH01000995G0600	-1.49574
PH01006176G0030	-1.06117	PH01000041G1920	-1.45501	PH01000928G0490	-1.90585
PH01002335G0300	-4.09071	Phyllostachys_edulis_newGene_42534	-1.40462	PH01002295G0270	-2.4129
PH01002509G0130	-3.43014	Phyllostachys_edulis_newGene_48662	-2.212	Phyllostachys_edulis_newGene_34362	-1.07862
Phyllostachys_edulis_newGene_82209	-4.37699	PH01006175G0030	-1.13307	Phyllostachys_edulis_newGene_41590	-2.58576
Phyllostachys_edulis_newGene_38454	-7.36968	Phyllostachys_edulis_newGene_27349	-1.15857	PH01000715G0370	-1.14368
PH01003157G0140	-1.79454	Phyllostachys_edulis_newGene_42880	-1.02529	PH01000869G0470	-1.49877
PH01001544G0320	-2.13998	Phyllostachys_edulis_newGene_48831	-1.6368	PH01000191G0410	-1.78993
PH01002219G0230	-1.61059	Phyllostachys_edulis_newGene_70184	-1.94765	Phyllostachys_edulis_newGene_46199	-2.82046
Phyllostachys_edulis_newGene_9560	-1.74207	PH01004069G0090	-1.65056	PH01000435G0340	-4.42888
PH01000006G0450	-2.1822	Phyllostachys_edulis_newGene_36109	-1.56746	PH01000082G0580	-1.07179
PH01000750G0160	-1.56685	PH01000160G0640	-1.47645	PH01000000G0960	-3.2636
Phyllostachys_edulis_newGene_81121	-2.95588	Phyllostachys_edulis_newGene_8838	-1.86871	Phyllostachys_edulis_newGene_18495	-1.05292
PH01000445G0600	-2.06071	Phyllostachys_edulis_newGene_73673	-1.83498	Phyllostachys_edulis_newGene_45275	-2.723
PH01000044G1410	-1.74216	Phyllostachys_edulis_newGene_21521	-1.32953	Phyllostachys_edulis_newGene_66332	-2.85608
PH01001910G0160	-2.34805	PH01001959G0010	-1.54093	PH01000744G0140	-1.7572
Phyllostachys_edulis_newGene_86080	-1.76777	PH01002076G0010	-2.66739	PH01000329G0990	-2.10564
PH01004298G0140	-2.45964	PH01001286G0020	-1.10902	PH01000630G0530	-2.09212
PH01000558G0660	-1.18907	Phyllostachys_edulis_newGene_71471	-1.22886	PH01003206G0090	-2.65424
PH01004004G0060	-2.31049	PH01000087G1730	-1.30058	PH01000287G0220	-2.83011
PH01000005G3110	-1.96791	PH01003585G0020	-1.12069	PH01002340G0260	-2.16655
PH01191613G0010	-2.6925	Phyllostachys_edulis_newGene_84538	-1.57991	PH01000428G0330	-1.67548
PH01000536G0010	-2.08562	PH01000017G1630	-1.50015	PH01000143G1570	-2.92591
PH01003426G0030	-1.61243	PH01000122G0750	-1.02127	PH01003179G0070	-2.87827
PH01000815G0230	-5.08903	PH01003226G0090	-1.20995	Phyllostachys_edulis_newGene_1612	-3.96489
Phyllostachys_edulis_newGene_17979	-3.2484	Phyllostachys_edulis_newGene_44635	-2.01174	PH01002825G0120	-2.04021
PH01000165G0980	-1.38033	Phyllostachys_edulis_newGene_29396	-1.31147	Phyllostachys_edulis_newGene_59919	-3.56212
PH01007234G0010	-3.4444	Phyllostachys_edulis_newGene_65570	-1.93981	Phyllostachys_edulis_newGene_81190	-1.85873
PH01000738G0280	-2.06029	Phyllostachys_edulis_newGene_55008	-2.64911	PH01000648G0840	-2.1945
PH01000232G0180	-2.72638	Phyllostachys_edulis_newGene_64323	-2.52603	PH01000147G0590	-1.057
PH01000532G0960	-3.16549	Phyllostachys_edulis_newGene_34164	-1.95654	PH01000135G0260	-2.16304
PH01002058G0270	-1.83234	Phyllostachys_edulis_newGene_84183	-1.62842	PH01003205G0140	-2.5033
PH01000780G0510	-2.74806	Phyllostachys_edulis_newGene_80449	-3.46922	Phyllostachys_edulis_newGene_30314	-1.7997
Phyllostachys_edulis_newGene_73810	-2.84094	Phyllostachys_edulis_newGene_78890	-1.05578	Phyllostachys_edulis_newGene_33645	-2.32407
PH01001730G0270	-3.20893	PH01001154G0590	-1.18585	PH01005801G0070	-6.42751
PH01000177G0380	-1.0699	Phyllostachys_edulis_newGene_26794	-1.64835	Phyllostachys_edulis_newGene_25471	-4.13864
PH01000226G0560	-2.36437	PH01000268G0540	-1.85598	PH01000039G0930	-2.78852
Phyllostachys_edulis_newGene_21073	-1.4844	Phyllostachys_edulis_newGene_80757	-1.3601	PH01000360G0720	-3.45793
PH01000439G0570	-1.85869	Phyllostachys_edulis_newGene_68296	-1.08693	PH01001382G0100	-2.12408
PH01004885G0050	-2.92428	PH01003141G0090	-2.81359	PH01003390G0010	-1.13117
PH01005609G0070	-1.48123	Phyllostachys_edulis_newGene_39777	-1.15502	PH01002823G0320	-2.66009
PH01000868G0210	-2.37596	PH01001738G0130	-1.04044	PH01000011G3030	-2.35926
PH01001902G0330	-2.82974	Phyllostachys_edulis_newGene_86378	-2.12642	PH01004313G0130	-3.8831
Phyllostachys_edulis_newGene_62493	-2.07766	Phyllostachys_edulis_newGene_6389	-2.17793	PH01000621G0330	-1.36014
PH01000013G1210	-1.89948	PH01003628G0120	-1.09723	Phyllostachys_edulis_newGene_47547	-1.72888
PH01000001G0820	-1.72253	PH01001382G0430	-1.04219	Phyllostachys_edulis_newGene_87716	-3.22255
Phyllostachys_edulis_newGene_47100	-1.84547	Phyllostachys_edulis_newGene_66019	-1.88443	Phyllostachys_edulis_newGene_60823	-1.43036
PH01000139G0430	-1.61288	PH01002073G0100	-1.35933	Phyllostachys_edulis_newGene_62025	-1.16404
Phyllostachys_edulis_newGene_32534	-1.05583	PH01001457G0010	-1.75928	PH01000064G1360	-1.01601
Phyllostachys_edulis_newGene_40070	-2.48583	PH01000918G0400	-1.29593	PH01000411G0610	-2.57519
PH01000095G1840	-2.71216	PH01003134G0050	-1.28922	PH01000090G1630	-1.86354
PH01004605G0030	-2.75992	Phyllostachys_edulis_newGene_73112	-1.10341	PH01000750G0050	-1.83181
PH01005812G0040	-1.71475	PH01001731G0060	-1.11236	PH01000414G0910	-1.1543
PH01000033G2130	-3.40897	PH01000303G0900	-1.05595	PH01005071G0070	-4.08859
Phyllostachys_edulis_newGene_33505	-4.97099	Phyllostachys_edulis_newGene_43117	-1.20583	PH01000180G0830	-1.73093
PH01000068G0430	-2.25044	Phyllostachys_edulis_newGene_68350	-1.7549	Phyllostachys_edulis_newGene_44514	-4.07689
Phyllostachys_edulis_newGene_78300	-1.81303	PH01000625G0050	-2.36108	PH01000143G0080	-2.77427
PH01000100G1750	-2.9821	Phyllostachys_edulis_newGene_82054	-1.60693	PH01003264G0110	-1.13126
Phyllostachys_edulis_newGene_45787	-2.12118	PH01000955G0430	-1.14228	PH01000810G0650	-2.53439
PH01000316G0270	-1.52351	PH01002029G0070	-1.00303	PH01000169G1060	-1.10363
PH01000716G0510	-1.09138	PH01000183G0680	-1.71358	Phyllostachys_edulis_newGene_57019	-2.34103
PH01000814G0190	-4.06697	Phyllostachys_edulis_newGene_81849	-1.15946	PH01004034G0030	-2.7659
PH01002213G0170	-1.66151	Phyllostachys_edulis_newGene_37526	-1.07479	Phyllostachys_edulis_newGene_3512	-2.75654
Phyllostachys_edulis_newGene_35218	-1.18224	PH01005309G0060	-1.64484	PH01000272G0850	-1.16172
PH01000548G0720	-3.96798	PH01000048G1100	-1.24771	PH01000553G0440	-1.3115
Phyllostachys_edulis_newGene_83727	-1.91706	PH01107020G0010	-1.7365	PH01001920G0150	-1.09595
Phyllostachys_edulis_newGene_77388	-2.11893	PH01000068G0540	-1.75288	PH01000112G0960	-1.74375
PH01002178G0270	-2.30054	PH01000355G0040	-1.53697	Phyllostachys_edulis_newGene_10891	-4.36247
PH01001331G0470	-4.92999	Phyllostachys_edulis_newGene_39491	-1.02805	PH01005389G0010	-1.9802
PH01000570G0140	-1.7768	Phyllostachys_edulis_newGene_46448	-1.21028	PH01000278G0590	-1.24844
PH01000816G0100	-1.37353	Phyllostachys_edulis_newGene_28420	-1.20052	Phyllostachys_edulis_newGene_75966	-2.56711
Phyllostachys_edulis_newGene_50894	-1.03321	PH01000072G1000	-1.38579	Phyllostachys_edulis_newGene_26688	-1.45105
Phyllostachys_edulis_newGene_29470	-3.11826	PH01001074G0670	-1.35792	PH01003890G0120	-2.71327
PH01011415G0030	-1.73875	PH01000043G1410	-1.42279	PH01000801G0240	-2.62772
PH01001451G0330	-2.12722	Phyllostachys_edulis_newGene_33647	-1.05565	PH01000841G0660	-1.50913
PH01000043G0210	-3.79764	PH01000361G0970	-1.3313	PH01003422G0130	-2.75338
PH01000043G1970	-2.33238	PH01001331G0120	-1.88645	Phyllostachys_edulis_newGene_29159	-3.28331
PH01002859G0180	-3.51148	Phyllostachys_edulis_newGene_46955	-1.20935	PH01000376G0290	-1.88643
PH01001355G0310	-1.3805	PH01001328G0270	-1.83515	PH01001302G0450	-2.49133
PH01003911G0030	-2.4399	Phyllostachys_edulis_newGene_45273	-4.11396	PH01000376G0870	-2.33239
PH01004145G0120	-1.03275	Phyllostachys_edulis_newGene_37025	-1.15403	PH01002545G0170	-1.33977
PH01002584G0290	-1.1443	PH01006252G0010	-1.0204	PH01000101G0280	-2.57317
PH01000604G0940	-2.96203	PH01002611G0150	-1.05632	PH01003942G0020	-1.24819
Phyllostachys_edulis_newGene_66709	-2.89107	PH01000405G0880	-1.12645	PH01000868G0460	-2.63165
PH01000383G0210	-2.29879	PH01000530G0450	-1.62466	PH01000042G1920	-2.27655
PH01002474G0210	-1.77304	PH01000181G0130	-1.64518	Phyllostachys_edulis_newGene_67084	-3.18456
PH01172955G0010	-1.64945	Phyllostachys_edulis_newGene_77555	-1.32891	Phyllostachys_edulis_newGene_66395	-2.38815
Phyllostachys_edulis_newGene_65014	-1.52689	PH01009045G0010	-1.32555	PH01000056G0470	-2.94861
PH01002076G0020	-2.43601	Phyllostachys_edulis_newGene_2676	-1.15859	Phyllostachys_edulis_newGene_34984	-1.91089
PH01003179G0180	-2.26357	PH01001329G0490	-1.82614	Phyllostachys_edulis_newGene_64016	-3.1495
PH01000616G0330	-3.66741	Phyllostachys_edulis_newGene_54554	-1.12878	PH01000523G0700	-2.22277
Phyllostachys_edulis_newGene_44829	-1.29089	PH01003169G0040	-1.07295	PH01000343G0390	-2.35156
PH01000447G0290	-2.44014	PH01002919G0240	-1.70813	PH01000723G0030	-2.53779
Phyllostachys_edulis_newGene_58840	-1.3807	PH01001828G0240	-1.66113	PH01005331G0090	-3.06267
PH01004295G0090	-2.43922	PH01000113G1740	-1.13449	PH01000147G1500	-1.98527
PH01000097G1770	-1.50584	Phyllostachys_edulis_newGene_26730	-1.40226	PH01001295G0450	-2.7855
PH01000361G0700	-2.52717	PH01001016G0100	-1.04662	PH01000450G0490	-1.6537
PH01001778G0300	-2.45309	PH01000373G0860	-1.75479	PH01001537G0320	-1.96886
Phyllostachys_edulis_newGene_54573	-3.06726	Phyllostachys_edulis_newGene_4320	-1.09197	PH01004272G0130	-1.7361
PH01000341G0150	-1.65178	Phyllostachys_edulis_newGene_26437	-1.08736	PH01001477G0090	-2.84754
PH01000624G0540	-4.9024	Phyllostachys_edulis_newGene_73222	-1.05072	PH01008253G0010	-1.09378
PH01000891G0480	-3.29497	PH01002211G0270	-1.43809	PH01000234G0890	-2.99336
PH01001176G0340	-1.45041	Phyllostachys_edulis_newGene_29568	-1.04545	PH01000781G0490	-1.43729
PH01003016G0040	-1.72811	PH01000877G0310	-2.25736	PH01000038G0330	-2.81918
Phyllostachys_edulis_newGene_68332	-1.37352	PH01000464G0810	-1.12607	PH01001028G0270	-1.51698
PH01000179G1050	-3.35306	Phyllostachys_edulis_newGene_46506	-1.10746	PH01001192G0050	-2.26367
PH01029929G0010	-2.74936	PH01001502G0210	-1.01718	PH01000155G0900	-1.32763
PH01001375G0170	-2.46471	Phyllostachys_edulis_newGene_62034	-1.18253	Phyllostachys_edulis_newGene_77743	-1.9681
Phyllostachys_edulis_newGene_13320	-2.09131	PH01000090G0720	-1.31691	PH01000070G1710	-1.90495
PH01000001G0800	-3.05467	PH01002067G0070	-1.40125	Phyllostachys_edulis_newGene_36232	-1.11913
PH01000360G0050	-4.50738	Phyllostachys_edulis_newGene_53634	-2.14708	PH01001206G0170	-1.88808
PH01036056G0010	-2.31017	PH01000079G0990	-1.2127	PH01000304G0800	-1.47194
PH01009255G0030	-3.92215	PH01000832G0640	-5.46848	PH01000098G1390	-3.05724
Phyllostachys_edulis_newGene_51724	-3.24871	PH01001036G0150	-1.19465	PH01004888G0020	-3.4835
PH01001411G0130	-1.7859	PH01000120G1470	-1.02357	PH01000411G0110	-1.62443
PH01002852G0200	-4.20104	Phyllostachys_edulis_newGene_31498	-1.40708	PH01000733G0640	-1.43524
PH01001892G0210	-6.15361	Phyllostachys_edulis_newGene_63813	-1.46895	PH01000198G0460	-2.18866
PH01001733G0080	-1.34456	PH01000043G2100	-1.46849	PH01001170G0470	-3.58878
Phyllostachys_edulis_newGene_80726	-2.01291	Phyllostachys_edulis_newGene_26254	-1.51918	PH01000944G0660	-2.35776
PH01000210G0890	-6.17738	Phyllostachys_edulis_newGene_50756	-1.05321	Phyllostachys_edulis_newGene_43201	-1.37932
Phyllostachys_edulis_newGene_39192	-4.20548	Phyllostachys_edulis_newGene_36253	-1.10127	Phyllostachys_edulis_newGene_42204	-2.13138
PH01001453G0450	-3.48903	Phyllostachys_edulis_newGene_30039	-1.25444	PH01000037G0050	-1.69787
PH01000490G0040	-3.15966	PH01131697G0010	-1.28774	PH01000662G0600	-2.74245
PH01001695G0140	-1.48952	PH01000313G0040	-1.41195	PH01000361G0560	-1.5511
PH01000378G0140	-1.4668	PH01003793G0230	-1.0402	PH01000531G0210	-3.36066
PH01000390G0450	-1.69473	Phyllostachys_edulis_newGene_65400	-1.20881	PH01000142G0520	-2.08691
PH01001087G0150	-1.05868	PH01000297G0660	-1.55708	PH01000502G0800	-1.23273
Phyllostachys_edulis_newGene_55861	-1.62795	PH01002854G0180	-1.45649	PH01002860G0170	-3.81618
PH01001412G0020	-3.45187	PH01000118G0310	-1.01806	PH01003838G0050	-3.30026
Phyllostachys_edulis_newGene_56448	-2.8255	Phyllostachys_edulis_newGene_63178	-1.42639	Phyllostachys_edulis_newGene_73021	-3.67005
PH01004212G0120	-1.85729	Phyllostachys_edulis_newGene_23694	-1.62904	PH01001676G0010	-1.61464
PH01000932G0310	-1.35488	PH01003944G0140	-1.41893	PH01003416G0040	-2.06088
PH01001250G0350	-3.72358	PH01102905G0010	-1.29131	Phyllostachys_edulis_newGene_70395	-5.0518
Phyllostachys_edulis_newGene_81143	-4.09579	Phyllostachys_edulis_newGene_70452	-1.70876	PH01001274G0330	-1.79792
PH01000314G0690	-1.88794	Phyllostachys_edulis_newGene_72083	-1.91734	Phyllostachys_edulis_newGene_26104	-1.89961
Phyllostachys_edulis_newGene_58230	-1.03637	PH01000003G0810	-1.17637	PH01002677G0230	-3.13642
PH01000005G3460	-1.50949	PH01002743G0100	-1.30071	PH01000803G0040	-1.51906
Phyllostachys_edulis_newGene_60938	-2.40313	Phyllostachys_edulis_newGene_32884	-2.35005	PH01000556G0040	-4.74512
PH01000099G1290	-2.42134	PH01008325G0020	-1.07882	PH01000174G1100	-1.62444
PH01000333G0620	-1.62781	Phyllostachys_edulis_newGene_87462	-2.02619	PH01002164G0150	-1.54087
PH01000277G1000	-1.94108	Phyllostachys_edulis_newGene_20199	-2.56319	PH01000252G0970	-2.20496
Phyllostachys_edulis_newGene_65836	-1.14611	PH01001033G0030	-1.91394	PH01000992G0340	-2.07921
PH01000841G0210	-1.93966	Phyllostachys_edulis_newGene_68253	-1.73797	PH01001302G0470	-1.35333
PH01000271G0470	-2.14493	PH01004536G0090	-1.78476	Phyllostachys_edulis_newGene_39305	-4.10969
PH01045682G0010	-2.22991	Phyllostachys_edulis_newGene_59114	-1.0422	PH01002114G0020	-2.63101
Phyllostachys_edulis_newGene_78494	-1.97102	PH01001736G0240	-1.05396	Phyllostachys_edulis_newGene_31533	-1.59411
PH01000814G0580	-1.96777	PH01003167G0070	-1.02346	Phyllostachys_edulis_newGene_52477	-1.87215
Phyllostachys_edulis_newGene_74284	-1.67327	PH01003353G0080	-1.1892	PH01001215G0340	-2.8785
Phyllostachys_edulis_newGene_72519	-1.24926	PH01001622G0070	-1.00108	PH01000357G0710	-2.39032
PH01016536G0020	-3.8397	Phyllostachys_edulis_newGene_26997	-1.10684	PH01000125G1100	-2.49926
PH01000121G1170	-2.40193	Phyllostachys_edulis_newGene_88491	-1.21471	Phyllostachys_edulis_newGene_57733	-5.06023
PH01000003G2570	-1.27776	Phyllostachys_edulis_newGene_49903	-1.32737	PH01000058G1900	-1.77296
Phyllostachys_edulis_newGene_5076	-1.50012	Phyllostachys_edulis_newGene_44228	-1.01755	PH01002584G0240	-3.30248
PH01001738G0130	-2.42892	PH01001224G0490	-1.27081	PH01001562G0450	-1.62958
PH01004272G0160	-1.64055	PH01001904G0170	-1.63302	Phyllostachys_edulis_newGene_63378	-1.15699
PH01132542G0010	-3.44806	PH01005801G0070	-1.44347	Phyllostachys_edulis_newGene_34293	-2.45984
PH01000919G0560	-1.85163	PH01000240G0370	-1.10163	PH01002448G0280	-2.11707
Phyllostachys_edulis_newGene_62938	-2.25547	PH01000751G0380	-1.17059	Phyllostachys_edulis_newGene_69895	-1.75946
PH01000428G0610	-1.63611	PH01000018G1630	-1.42349	PH01003947G0030	-1.06825
Phyllostachys_edulis_newGene_56681	-1.55626	PH01004403G0060	-1.96297	Phyllostachys_edulis_newGene_36169	-1.01902
PH01002755G0080	-2.62081	Phyllostachys_edulis_newGene_78323	-2.50555	Phyllostachys_edulis_newGene_42090	-3.1927
PH01000487G0400	-1.97282	PH01007067G0010	-1.23352	PH01001621G0250	-1.58554
PH01005035G0010	-2.27888	PH01002171G0230	-1.26907	PH01001376G0180	-2.69477
PH01002929G0150	-1.45424	Phyllostachys_edulis_newGene_1240	-1.9542	Phyllostachys_edulis_newGene_40847	-2.01155
PH01000803G0460	-1.97235	PH01000526G0060	-2.58979	Phyllostachys_edulis_newGene_27970	-1.86988
PH01002791G0200	-2.33952	PH01002370G0230	-1.56722	PH01000077G0200	-1.7381
PH01150505G0010	-2.78012	PH01001127G0560	-1.16931	PH01005099G0030	-3.77534
PH01001973G0150	-2.14491	Phyllostachys_edulis_newGene_65777	-1.53122	Phyllostachys_edulis_newGene_48925	-1.68994
Phyllostachys_edulis_newGene_69991	-3.1181	PH01000196G0330	-1.05204	PH01001431G0380	-1.13463
Phyllostachys_edulis_newGene_49470	-5.41106	Phyllostachys_edulis_newGene_40810	-1.21202	PH01000125G0950	-1.03044
PH01002934G0030	-1.75906	Phyllostachys_edulis_newGene_30815	-1.14886	PH01000619G0080	-1.01683
PH01167417G0010	-2.6338	PH01001321G0140	-1.21305	Phyllostachys_edulis_newGene_78159	-4.79237
PH01000404G0050	-1.91327	PH01000615G0020	-1.39252	PH01001624G0310	-1.01159
PH01001365G0170	-3.57685	PH01002719G0170	-1.00846	PH01000381G0510	-1.65773
Phyllostachys_edulis_newGene_31990	-3.26074	PH01002867G0140	-1.05603	PH01001307G0260	-1.00231
PH01000001G2610	-2.25801	Phyllostachys_edulis_newGene_50914	-1.5696	PH01000892G0410	-1.01066
PH01000046G1730	-1.91433	PH01000209G0210	-2.61954	PH01000338G0010	-2.35798
PH01000023G1300	-2.4417	Phyllostachys_edulis_newGene_50048	-1.34303	Phyllostachys_edulis_newGene_53932	-3.87967
PH01000817G0620	-1.98868	Phyllostachys_edulis_newGene_63422	-1.14871	PH01000038G0110	-2.83387
PH01001049G0620	-3.57614	PH01001991G0310	-1.21452	Phyllostachys_edulis_newGene_53643	-2.60882
PH01000223G1130	-2.34467	Phyllostachys_edulis_newGene_29520	-2.11175	PH01003979G0100	-3.12452
PH01000474G0130	-2.70066	PH01000356G0330	-2.14356	PH01002711G0240	-2.41608
Phyllostachys_edulis_newGene_77212	-5.46599	PH01000058G0270	-1.02156	PH01001546G0080	-1.97391
Phyllostachys_edulis_newGene_51774	-1.73947	PH01000994G0120	-1.07194	PH01000107G0940	-1.39496
PH01000491G0810	-3.83057	PH01002564G0070	-1.42158	PH01000056G1870	-2.43896
Phyllostachys_edulis_newGene_31011	-4.16674	Phyllostachys_edulis_newGene_10391	-1.28068	Phyllostachys_edulis_newGene_66214	-3.22628
PH01001714G0230	-2.20421	PH01001816G0040	-1.04051	PH01001482G0060	-1.25995
PH01000348G0270	-1.73763	PH01001204G0070	-1.15867	PH01002248G0250	-2.60569
PH01000087G0530	-4.28424	PH01001348G0370	-1.02661	PH01003618G0070	-2.1075
PH01001835G0310	-1.39827	PH01086369G0010	-1.09764	PH01000329G1010	-2.22931
Phyllostachys_edulis_newGene_19304	-2.22942	PH01000227G0430	-1.02929	Phyllostachys_edulis_newGene_34320	-1.5422
PH01000067G0250	-2.40081	Phyllostachys_edulis_newGene_56131	-1.88511	PH01000268G0540	-1.13841
PH01004159G0100	-1.87025	Phyllostachys_edulis_newGene_74312	-2.83388	PH01000922G0240	-1.74834
Phyllostachys_edulis_newGene_42174	-1.49343	PH01000450G1030	-1.31192	PH01000704G0310	-1.57884
PH01002862G0090	-1.24766	Phyllostachys_edulis_newGene_1031	-1.5244	PH01000130G0370	-2.591
Phyllostachys_edulis_newGene_54790	-1.17779	Phyllostachys_edulis_newGene_2989	-1.06402	PH01000165G1370	-1.04386
PH01000523G0060	-1.87258	PH01000991G0340	-1.05401	Phyllostachys_edulis_newGene_55670	-2.67114
PH01000361G0510	-3.04921	PH01003420G0060	-1.25988	PH01001220G0630	-1.32496
PH01079072G0010	-3.68884	Phyllostachys_edulis_newGene_65798	-1.10308	PH01000740G0610	-2.27564
Phyllostachys_edulis_newGene_56884	-3.38952	PH01000214G0170	-2.38983	PH01001514G0250	-1.093
PH01000277G0390	-1.12913	Phyllostachys_edulis_newGene_69278	-1.38968	PH01003385G0160	-3.28937
PH01002369G0270	-3.87701	PH01001381G0150	-1.68226	PH01000323G0190	-2.73736
PH01000461G0760	-4.5306	Phyllostachys_edulis_newGene_55687	-1.33685	PH01000278G0810	-1.74513
PH01000031G1760	-2.20834	PH01004469G0020	-1.05873	PH01000918G0050	-2.75828
Phyllostachys_edulis_newGene_27225	-2.57265	PH01000068G0150	-1.11946	PH01002320G0300	-1.52855
PH01000851G0380	-1.03434	PH01000439G0880	-1.88946	PH01002767G0080	-2.59241
PH01001173G0360	-1.58669	Phyllostachys_edulis_newGene_17467	-1.09633	PH01001696G0270	-2.22643
Phyllostachys_edulis_newGene_41726	-2.10134	PH01000011G1240	-1.11443	PH01000616G0010	-1.7448
Phyllostachys_edulis_newGene_27001	-1.15985	Phyllostachys_edulis_newGene_41026	-1.31087	PH01000892G0300	-1.75531
PH01000436G0190	-2.43591	PH01000056G0490	-1.42694	PH01000644G0560	-1.95866
PH01002671G0200	-1.55841	Phyllostachys_edulis_newGene_52501	-2.04611	PH01000081G0150	-1.79368
PH01002536G0030	-1.62501	PH01003162G0080	-1.39212	Phyllostachys_edulis_newGene_37672	-1.07351
PH01000140G1140	-3.27598	PH01000178G0330	-2.14129	PH01001252G0190	-2.90573
PH01001472G0160	-1.64005	Phyllostachys_edulis_newGene_38072	-2.57681	PH01003425G0180	-1.75841
PH01001014G0340	-4.31675	PH01000276G1110	-1.35977	PH01000026G0870	-1.41207
PH01002598G0040	-2.50967	Phyllostachys_edulis_newGene_73296	-1.00624	PH01000136G1370	-1.63751
Phyllostachys_edulis_newGene_77325	-2.30219	Phyllostachys_edulis_newGene_26094	-1.07942	Phyllostachys_edulis_newGene_67266	-5.6373
Phyllostachys_edulis_newGene_50392	-1.32758	PH01000355G0880	-1.19433	PH01000438G0540	-1.95902
PH01003019G0170	-2.66571	Phyllostachys_edulis_newGene_60963	-1.07234	PH01000067G1590	-1.40076
[truncated: 13,170 more rows]
