# Supplementary material for: Differential transcriptome analysis and identification of genes related to resistance to blight in three varieties of Bambusa pervariabilis × Dendrocalamopsis grandis
Source: PeerJ. 2021 Oct 18;9:e12301. doi: 10.7717/peerj.12301 (PMC8530093; doi:10.7717/peerj.12301)
Supplement: Supplemental Information 7 [file peerj-09-12301-s007.xlsx]

## Sheet: Sheet1
品种	发病率1	发病率2	发病率3	病情指数1	病情指数2	病情指数3
3	23.3
6	6.7
8	63.3

## Sheet: Sheet2
Species	Healthy	Level 1	Level 2	Level 3	Level 4	Incidence(%)	Disease index
3＃1	23	3	2	2	0	23.3333	10.8333	23.3333	12.2222
3＃2	24	1	2	3	0	20	11.6667
3＃3	22	2	3	3	0	26.6667	14.1667
6＃1	28	1	1	0	0	6.66667	2.5	7.77778	2.77778
6＃2	27	2	1	0	0	10	3.33333
6＃3	28	1	1	0	0	6.66667	2.5
8＃1	4	4	5	7	10	86.6667	62.5	85.5556	62.7778
8＃2	4	3	5	7	11	86.6667	65
8＃3	5	2	6	9	8	83.3333	60.8333
