# Supplementary material for: Differential transcriptome analysis and identification of genes related to resistance to blight in three varieties of Bambusa pervariabilis × Dendrocalamopsis grandis
Source: PeerJ. 2021 Oct 18;9:e12301. doi: 10.7717/peerj.12301 (PMC8530093; doi:10.7717/peerj.12301)
Supplement: Supplemental Information 8 [file peerj-09-12301-s008.xlsx]

## Sheet: Sheet1
			J6			J3			J8
	Gene Name	1	2	3	1	2	3	1	2	3
	GAPDH	25.04	21.49	21.82	22.3	20.29	20.73	21.92	20.34	20.38	AVERAGE,q-PCR log2FC（J3 VS J6）	AVERAGE,q-PCR log2FC（J8 VS J6）		#ID	transcriptome log2FC（J3 VS J6）	transcriptome log2FC(J8 VS J6)
PH01000030G0570	Tfbl	24.31	24.34	20.02	27.82	28.43	28.21	35.02	35.56	26.14	6.94	11.2533		PH01000030G0570	5.40875	10.8955
PH01000322G0910	Lrr-rlk2	25.87	26.87	24.99	28.34	25.93	25.14	35.17	34.18	33.02	2.23667	10.1167		PH01000322G0910	5.59143	11.1923
PH01000356G0220	Cer1l	24.87	29.3	20.12	26.23	27.89	19.07	26.15	31.99	24.29	1.31	4.61667		PH01000356G0220	4.0748	6.59939
PH01000743G0130	Gdsl-ll	28.98	27.02	27.31	27.49	29.62	23.56	29.95	36.19	28.39	0.796667	5.64333		PH01000743G0130	1.10649	4.72851
PH01000967G0060	Prp4l	24.97	28.34	25.12	25.49	26.34	23.29	34.94	37.64	33.33	0.573333	11.0633		PH01000967G0060	2.99247	12.6126
PH01001075G0100	Scl45	17.98	24.68	22.58	23.47	25.58	26.42	23.15	30.85	29.71	5.08667	8.06		PH01001075G0100	7.77472	10.8514
PH01001222G0140	Faah	28.87	27.23	26.01	28.38	26.83	23.38	40.17	37.44	35.12	0.503333	12.11		PH01001222G0140	2.37924	10.952
PH01001261G0170	Klp	23.14	29.44	26.1	27.39	28.48	27.31	32.42	38.39	32.26	3.17667	10.0333		PH01001261G0170	6.27231	12.2207
PH01001610G0170	Plbp	18.41	20.18	20.1	25.55	26.31	25.96	27.59	29.88	29.44	8.05333	11.31		PH01001610G0170	8.16093	12.4226
PH01002098G0130	Xth28	24.44	31.96	30.19	28.49	29.94	30.01	33.24	40.08	39.3	2.29333	10.58		PH01002098G0130	4.04385	11.0634
PH01002765G0010	C2agdcp	23.93	28.81	27.82	26.38	27.85	25.97	26.06	34.93	30.97	1.55667	5.70333		PH01002765G0010	4.67682	7.16196
PH01002901G0100	Laoh	25.77	32.74	27.2	27.42	30.82	26.41	33.99	41.9	35.4	1.32333	10.43		PH01002901G0100	4.86542	10.8923
PH01003226G0090	Atlp3	23.56	26.41	26.41	29.81	29.49	28.62	33.69	37.52	35.53	5.52333	12.0233		PH01003226G0090	4.15062	11.2348
PH01151705G0010	Gdsl-ll	14.94	22.6	16.04	20.11	23.38	19.25	17.07	24.59	18.15	4.73	3.98		PH01151705G0010	7.30363	5.49636
PH01000966G0470	Pod4l	25.02	25.5	27.34	25.58	23.63	25.49	32.79	33.58	34.44	0.623333	9.55333		PH01000966G0470	1.32097	10.8253
PH01000008G1560	Myb4l	23.19	29.89	26.05	23.56	26.93	25.89	23.33	29.23	26.19	0.76	1.77667		PH01000008G1560	3.32736	4.95909
PH01004943G0040	Pec53	23.77	28.55	28.33	40.62	39.59	40.48	30.09	34.58	35.63	15.0233	8.45333		PH01004943G0040	11.9995	9.23478
newGene_56747	B-bwip1	31.14	36.25	34.08	36.23	38.38	37.28	39.38	47.36	42.42	5.15	11.1333		Phyllostachys_edulis_newGene_56747	8.74542	11.7989
newGene_63038	Egl20	24.74	29.26	31.63	41.03	40.45	41.93	31.85	38.27	38.85	14.27	9.68333		Phyllostachys_edulis_newGene_63038	11.6092	11.7797
newGene_67872	Pod16	28.27	32.39	32.63	29.55	31.43	30.94	32.6	38.5	35.78	1.22	6.43333		Phyllostachys_edulis_newGene_67872	3.40012	6.23295
newGene_84366	Cad5	25.14	26.99	24.1	24.39	22.81	24.34	23.27	23.62	26.44	0.113333	0.936667		Phyllostachys_edulis_newGene_84366	1.68046	0.942822
PH01087490G0010	PIrcsn	29.06	32.02	26.83	24.74	23.84	20.32	25.7	27.45	21.28	-4.66	-2.59		PH01087490G0010	-2.15772	-0.968048
PH01000445G0570	Podbd2	21.19	28.03	24.41	15.36	17.49	15.03	17.83	24.67	21.25	-6.90667	-1.39		PH01000445G0570	-2.10762	-0.864145
PH01000974G0460	Hltfah1	18.67	19.75	18.47	21.04	18.84	18.64	20.84	20.1	17.65	2.22	2.47		PH01000974G0460	3.59551	4.53423
PH01000040G1380	Clbd	20.76	26.52	24.12	22.32	23.56	21.32	22.93	28.63	25.25	0.276667	3.70667		PH01000040G1380	3.0661	3.21436
PH01000445G0440	Podbd4	21.68	25.07	23.95	16.36	15.63	17.52	18.33	21.36	19.94	-5.38667	-1.78667		PH01000445G0440	-1.65923	-0.884968
#ID	Gene Name	q-PCR（J3 VS J6）	transcriptome（J3 VS J6）	q-PCR（J8 VS J6）	transcriptome(J8 VS J6)
PH01000030G0570	Tfbl	6.94	5.40875	11.2533	10.8955
PH01000322G0910	Lrr-rlk2	2.23667	5.59143	10.1167	11.1923
PH01000356G0220	Cer1l	1.31	4.0748	4.61667	6.59939
PH01000743G0130	Gdsl-ll	0.796667	1.10649	5.64333	4.72851
PH01000967G0060	Prp4l	0.573333	2.99247	11.0633	12.6126
PH01001075G0100	Scl45	5.08667	7.77472	8.06	10.8514
PH01001222G0140	Faah	0.503333	2.37924	12.11	10.952
PH01001261G0170	Klp	3.17667	6.27231	10.0333	12.2207
PH01001610G0170	Plbp	8.05333	8.16093	11.31	12.4226
PH01002098G0130	Xth28	2.29333	4.04385	10.58	11.0634
PH01002765G0010	C2agdcp	1.55667	4.67682	5.70333	7.16196
PH01002901G0100	Laoh	1.32333	4.86542	10.43	10.8923
PH01003226G0090	Atlp3	5.52333	4.15062	12.0233	11.2348
PH01151705G0010	Gdsl-ll	4.73	7.30363	3.98	5.49636
PH01000966G0470	Pod4l	0.623333	1.32097	9.55333	10.8253
PH01000008G1560	Myb4l	0.76	3.32736	1.77667	4.95909
PH01004943G0040	Pec53	15.0233	11.9995	8.45333	9.23478
Phyllostachys_edulis_newGene_56747	B-bwip1	5.15	8.74542	11.1333	11.7989
Phyllostachys_edulis_newGene_63038	Egl20	14.27	11.6092	9.68333	11.7797
Phyllostachys_edulis_newGene_67872	Pod16	1.22	3.40012	6.43333	6.23295
Phyllostachys_edulis_newGene_84366	Cad5	0.113333	1.68046	0.936667	0.942822
PH01087490G0010	PIrcsn	-4.66	-2.15772	-2.59	-0.968048
PH01000445G0570	Podbd2	-6.90667	-2.10762	-1.39	-0.864145
PH01000974G0460	Hltfah1	2.22	3.59551	2.47	4.53423
PH01000040G1380	Clbd	0.276667	3.0661	3.70667	3.21436
PH01000445G0440	Podbd4	-5.38667	-1.65923	-1.78667	-0.884968
